# Supplementary material for: Association between nut intake and non-alcoholic fatty liver disease risk: a retrospective case-control study in a sample of Chinese Han adults
Source: PubMed Central journal article supplement — BMJ Open. 2019 Sep 4;9(9):e028961. doi: 10.1136/bmjopen-2019-028961 (PMC6731785; doi:10.1136/bmjopen-2019-028961), 2019-09-04
Supplement: bmjopen-2019-028961.draft_revisions.pdf [file bmjopen-2019-028961.draft_revisions.pdf]

# BMJ Open

BMJ Open is committed to open peer review. As part of this commitment we make the peer review history of every article we publish publicly available.

When an article is published we post the peer reviewers' comments and the authors' responses online. We also post the versions of the paper that were used during peer review. These are the versions that the peer review comments apply to.

The versions of the paper that follow are the versions that were submitted during the peer review process. They are not the versions of record or the final published versions. They should not be cited or distributed as the published version of this manuscript.

BMJ Open is an open access journal and the full, final, typeset and author-corrected version of record of the manuscript is available on our site with no access controls, subscription charges or pay-per-view fees (<http://bmjopen.bmj.com>).

If you have any questions on BMJ Open's open peer review process please email [editorial.bmjopen@bmj.com](mailto:editorial.bmjopen@bmj.com)

# BMJ Open

## Association between nut intake and NAFLD risk: a case-control study in a sample of Chinese Han adults

|                               |                                                                                                                                                                                                                                                                                                                                                                                                                                                                                                                                                                                                                                                                                                                                                                                                                                                                                                                                                                                                                                                                                                                                                                                                                                                                                    |
|-------------------------------|------------------------------------------------------------------------------------------------------------------------------------------------------------------------------------------------------------------------------------------------------------------------------------------------------------------------------------------------------------------------------------------------------------------------------------------------------------------------------------------------------------------------------------------------------------------------------------------------------------------------------------------------------------------------------------------------------------------------------------------------------------------------------------------------------------------------------------------------------------------------------------------------------------------------------------------------------------------------------------------------------------------------------------------------------------------------------------------------------------------------------------------------------------------------------------------------------------------------------------------------------------------------------------|
| Journal:                      | <i>BMJ Open</i>                                                                                                                                                                                                                                                                                                                                                                                                                                                                                                                                                                                                                                                                                                                                                                                                                                                                                                                                                                                                                                                                                                                                                                                                                                                                    |
| Manuscript ID                 | bmjopen-2019-028961                                                                                                                                                                                                                                                                                                                                                                                                                                                                                                                                                                                                                                                                                                                                                                                                                                                                                                                                                                                                                                                                                                                                                                                                                                                                |
| Article Type:                 | Research                                                                                                                                                                                                                                                                                                                                                                                                                                                                                                                                                                                                                                                                                                                                                                                                                                                                                                                                                                                                                                                                                                                                                                                                                                                                           |
| Date Submitted by the Author: | 07-Jan-2019                                                                                                                                                                                                                                                                                                                                                                                                                                                                                                                                                                                                                                                                                                                                                                                                                                                                                                                                                                                                                                                                                                                                                                                                                                                                        |
| Complete List of Authors:     | Chen, Bing bing; Fujian Medical University, Han, Ying; The First Affiliated Hospital of Fujian Medical University Pan, Xinting; Department of Epidemiology and Health Statistics, Fujian Provincial Key Laboratory of Environment Factors and Cancer, School of Public Health, Fujian Medical University<br>Yan, Jianhui; Department of Epidemiology and Health Statistics, Fujian Provincial Key Laboratory of Environment Factors and Cancer, School of Public Health, Fujian Medical University<br>Liu, Wenjuan; Department of Epidemiology and Health Statistics, Fujian Provincial Key Laboratory of Environment Factors and Cancer, School of Public Health, Fujian Medical University<br>li, yangfan; Department of Epidemiology and Health Statistics, Fujian Provincial Key Laboratory of Environment Factors and Cancer, School of Public Health, Fujian Medical University, Fujian, China, ;<br>lin, xu; Key Laboratory of Ministry of Education for Gastrointestinal Cancer, Fujian Medical University, Fujian, China<br>xu, shanghua; Department of Cardiology, Affiliated Nanping First Hospital, Fujian Medical University, Nanping, China<br>Peng, Xian-E; Key Laboratory of Ministry of Education for Gastrointestinal Cancer, Fujian Medical University, Fujian, |
| Keywords:                     | EPIDEMIOLOGY, NUTRITION & DIETETICS, Lipid disorders < DIABETES & ENDOCRINOLOGY                                                                                                                                                                                                                                                                                                                                                                                                                                                                                                                                                                                                                                                                                                                                                                                                                                                                                                                                                                                                                                                                                                                                                                                                    |
|                               |                                                                                                                                                                                                                                                                                                                                                                                                                                                                                                                                                                                                                                                                                                                                                                                                                                                                                                                                                                                                                                                                                                                                                                                                                                                                                    |

SCHOLARONE™  
Manuscripts

1  
2  
3 **Association between nut intake and NAFLD risk: a case-control study in a**  
4 **sample of Chinese Han adults**  
5  
6

7  
8 Bingbing Chen<sup>1#</sup>, Ying Han<sup>2#</sup>, Xinting Pan<sup>1</sup>, Jianhui Yan, Wenjuan Liu<sup>1</sup>, Yangfan Li<sup>1</sup>, Xu Lin<sup>3</sup>,  
9 Shanghua Xu<sup>4</sup>, Xian-e Peng<sup>1,3\*</sup>

10  
11 <sup>1</sup> Department of Epidemiology and Health Statistics, Fujian Provincial Key  
12  
13 Laboratory of Environment Factors and Cancer, School of Public Health, Fujian  
14  
15 Medical University, Fujian, China;

16  
17  
18 <sup>2</sup> The First Affiliated Hospital of Fujian Medical University

19  
20 <sup>3</sup> Key Laboratory of Ministry of Education for Gastrointestinal Cancer, Fujian  
21  
22 Medical University, Fujian, China;

23  
24 <sup>4</sup> Department of Cardiology, Affiliated Nanping First Hospital, Fujian Medical  
25  
26 University, Nanping, China

27  
28  
29 # Both authors contributed equally to this work.

30  
31 \* Corresponding author. Xian-E Peng, Department of Epidemiology and Health  
32  
33 Statistics, Fujian Provincial Key Laboratory of Environment Factors and Cancer,  
34  
35 School of Public Health, Fujian Medical University, Fujian, China, 3501018  
36  
37 Phone: +86-0591 22862648; E-mail: fमुखe@163.com  
38  
39

40  
41 **Running title:** Nut intake and non-alcoholic fatty liver disease  
42  
43  
44  
45

46 **Word count:** 2622  
47  
48  
49  
50  
51  
52  
53  
54  
55  
56  
57  
58  
59  
60

## Abstract

**Background/Objectives:** Nut consumption has been associated with a lower risk of type 2 diabetes, metabolic syndrome, and insulin resistance. However, its effect on the risk of non-alcoholic fatty liver disease (NAFLD) is unknown. Therefore, we investigated the relationship between nut consumption and NAFLD risk.

**Subjects/Methods:** A case-control study was conducted among 534 patients diagnosed with NAFLD and 534 controls matched by sex and age ( $\pm 5$ ) from the Affiliated Nanping First Hospital of Fujian Medical University in China. Information on dietary intake was collected using a semi-quantitative food frequency questionnaires and nut consumption was calculated. Nut consumption was categorized using quartiles based on the distribution of daily nut intake of the controls. Binary logistic regression models were used to estimate odds ratio (ORs) and the 95% confidence intervals (CIs) for the association between nut consumption and NAFLD risk.

**Results:** After adjusting for potential confounding variables, nut consumption was not associated with NAFLD risk in the overall sample. When the fully adjusted model was stratified by sex, a significant inverse association was found between high nut consumption and NAFLD only among the men in the highest quartile (OR = 0.45; 95% CI: 0.27–0.76;  $P_{\text{trend}} = 0.01$ ). The inverse association of nut consumption with NAFLD risk in men remained significant after controlling for other known or suspected risk factors for NAFLD.

**Conclusions:** Diets with a higher intake of nuts may be associated with a decreased risk of NAFLD, particularly in men.

**Keywords:** NAFLD ; Nut consumption ; case-control study

## Introduction

Non-alcoholic fatty liver disease (NAFLD) is defined as macrovesicular steatosis in  $\geq 5\%$  of hepatocytes, in the absence of a secondary cause, such as alcohol or drug use. NAFLD has become a leading cause of chronic liver disease, with a 25% prevalence worldwide<sup>1</sup>. Furthermore, a fatty liver is more prevalent in men compared with women<sup>2</sup>. The prevalence of NAFLD among the adults in China's general population is approximately 15% (6.3–27.0%), depending on the population studied<sup>3</sup>. Many studies suggest that diet and lifestyle may significantly influence the risk of NAFLD<sup>4, 5</sup>. These studies indicate that type 2 diabetes (T2D)<sup>6</sup>, metabolic syndrome (MetS), obesity<sup>7</sup>, physical activity, and a high-fat diet<sup>4</sup> are associated with an increased risk for the development of NAFLD.

Nuts are nutrient-dense foods with complex matrices rich in unsaturated fatty and other bioactive compounds (e.g., high-quality vegetable protein, fiber, minerals, tocopherols, phytosterols, and phenolic compounds)<sup>8</sup>. The global intake of nuts has increased by 59% over the past decade<sup>9</sup>. China's per capita intake of nuts was 2.2 g/day in 1982, and increased to 3.8g/day in 2012<sup>10</sup>. Although they are high in fat and energy dense, a high intake of nuts has been associated with several health benefits, including reduced risk of cardiovascular disease<sup>11</sup>, T2D<sup>12</sup>, MetS<sup>13</sup>, and insulin resistance<sup>14, 15</sup>. Moreover, nuts have antioxidative effects by decreasing lipid peroxidation and protecting against oxidative DNA damage<sup>16</sup>. Beneficial health effects have been attributed to the macronutrient and micronutrient profiles of nuts<sup>17</sup>.

NAFLD is regarded as the "hepatic manifestation of MetS." Few studies have assessed the effects of nut intake on NAFLD, despite previous findings of an inverse correlation between high nut consumption and the risk of T2D and cardiovascular disease. In this study, we analyzed the association between nut intake and NAFLD

1  
2  
3 risk and the interactions between nut intake and other established NAFLD risk factors  
4  
5 in a large case-control study with a sample of Han adults in China.  
6  
7

## 8 **Patient and Public Involvement**

9  
10 This study is a case-control design focused on a Chinese Han population between  
11  
12 18 and 70 years old. Subjects were recruited from a health examination center of  
13  
14 Nanping First Affiliated Hospital of Fujian Medical University from October 2015 to  
15  
16 September 2017. All subjects underwent abdominal ultrasound and blood biochemical  
17  
18 tests. Once cases and controls have been linked to the NAFLD, a letter of invitation  
19  
20 and information about the study will be sent to each potential case and control to  
21  
22 obtain consent. Eligible subjects will be interviewed face-to-face by investigators to  
23  
24 collect data. The study was approved by the local ethics committees of Fujian  
25  
26 Medical University (ethics number 2014096). In addition, all methods were performed  
27  
28 in accordance with the relevant guidelines and regulations.  
29  
30  
31

## 32 **Subjects and Methods**

### 33 **Participants and study design**

34  
35 We conducted the case-control study in a health examination center at the  
36  
37 Affiliated Nanping First Hospital of Fujian Medical University from April 2015 to  
38  
39 August 2017. Patients newly diagnosed with NAFLD using ultrasonography in  
40  
41 accordance with the “Guidelines for the diagnosis and treatment of nonalcoholic fatty  
42  
43 liver disease in China” were included in the study. All participants were of Chinese  
44  
45 Han ethnicity. The exclusion criteria were as follows: (a) daily alcohol intake of >40 g  
46  
47 (men) and >20 g (women), (b) a history of other liver diseases including drug-induced  
48  
49 liver disease, viral hepatitis, autoimmune hepatitis, total parenteral nutrition, and  
50  
51 hepatolenticular degeneration, (c) taking hypolipidemic or weight reduction drugs, (d)  
52  
53 age <18 or >70 years, (e) non-resident of Nanping, or (f) not of Han ethnicity. Adults  
54  
55  
56  
57  
58  
59  
60

1  
2  
3 who reported extremely abnormal levels of energy intake (2 511.60 kJ [600 kcal] or  
4  
5 17 581.20 kJ [4 200kcal] per day for men; 2 093 kJ [500 kcal] or 14,651.00 kJ [3500  
6  
7 kcal] per day for women), and those who did not answer 25 or more food-related  
8  
9 items or questions about nut intake on the questionnaire, were excluded from the  
10  
11 study.  
12  
13

14  
15 The controls were randomly selected from the same center during the study period.  
16  
17 Their eligibility criteria were identical to those of the cases, except for the  
18  
19 requirement of a diagnosis of liver steatosis; they were frequency-matched with cases  
20  
21 by age (within 5-yr intervals), gender, ethnicity, and region of origin. The study was  
22  
23 approved by the local ethics committee of Fujian Medical University. All procedures  
24  
25 were performed in accordance with relevant guidelines and regulations, and all  
26  
27 participants provided written informed consent.  
28  
29

### 30 31 **Dietary Assessment**

32  
33 Trained interviewers performed a comprehensive medical history on each  
34  
35 participant that included eliciting information about their demographic and  
36  
37 socio-economic characteristics, and lifestyle habits (e.g., smoking, drinking (alcohol),  
38  
39 tea drinking, and physical activity). The data were obtained from participants using  
40  
41 structured questionnaires during face-to-face interviews. Information about  
42  
43 participants' typical food consumption was collected using a semi-quantitative food  
44  
45 frequency questionnaire, which was developed and validated in a sample from  
46  
47 southern China <sup>18</sup>. Participants were asked to estimate the average frequency of  
48  
49 consumption of selected foods using the following response options: rarely,  
50  
51 <once/month, 1–3 times/month, 1–2 times/week, 3–4 times/week, 5–6 times/week,  
52  
53 once/day, twice/day, and >twice/day. Nut intake was defined as the consumption of  
54  
55 “peanuts, walnuts, seeds, or other nuts.” Data from a semi-quantitative food frequency  
56  
57  
58  
59  
60

1  
2  
3 questionnaire were used to calculate daily nut and energy intake. Nut consumption  
4 was converted to grams/day by multiplying the food-intake frequency by fixed  
5 portion sizes. Nutrient intake, such as mono-unsaturated fatty acids (MUFAs) and  
6 poly-unsaturated fatty acids (PUFAs) were calculated by multiplying the intake  
7 frequency of each food by the nutrient content of the specified portion, and summing  
8 the products of all the food items.  
9

### 17 **Statistical analysis**

19 Participants' characteristics were analyzed using Pearson's Chi-square test for  
20 categorical variables, and Wilcoxon's rank-sum test and ANOVA for continuous  
21 variables. Nut consumption was categorized by quartiles based on the distribution of  
22 daily nut intake by the controls (Q1-Q4). Binary logistic regression models were used  
23 to estimate the odds ratios (ORs) and their 95% confidence intervals (CIs) for the  
24 associations between nut consumption and NAFLD risk. To account for the energy  
25 content of the nut, our initial model adjusted for total energy intake by using the  
26 residuals method. The final model adjusted for potential confounders, including age,  
27 income, smoking status, educational level, and tea-drinking status, occupational status,  
28 marital status, body mass index (BMI), physical activity (The intensity of physical  
29 activity was defined in terms of Metabolic Equivalent of Energy (MET). According to  
30 a standard reference, each kind of activity was assigned a specific MET value: light  
31 physical activities were defined as <3 METs, moderate activities defined as 3~6 METs  
32 and severe activities defined as >6 METs). The total dose of physical activity equals  
33 the sum of the doses for each specific activity., and history of diabetes, hypertension,  
34 and hyperlipidemia. The final model also adjusted for MUFA and PUFA intake to  
35 control for their effects. The selection of covariates for the final model was based on  
36 clinical significance, results of previous studies, and strength of the correlation with  
37  
38  
39  
40  
41  
42  
43  
44  
45  
46  
47  
48  
49  
50  
51  
52  
53  
54  
55  
56  
57  
58  
59  
60



1  
2  
3 exposure. We tested for linear trends across categories of nut intake by assigning each  
4 participant the median value for each category and modeling this value as a  
5 continuous variable.  
6  
7  
8  
9

10 We evaluated the influence of nut consumption across strata of other potential  
11 predictors and confounders, comparing participants in the highest nut-consumption  
12 category to the lowest nut-consumption category(reference). We also analyzed the  
13 interactions of nut consumption with age, sex, BMI, smoking status, educational level,  
14 tea-drinking status, and other risk factors. We used the medians of the continuous  
15 variables to categorize them and evaluate the interactions. The criteria for statistical  
16 significance of the likelihood-ratio test of interaction effects was  $P < 0.05$ . Statistical  
17 analyses were performed using SPSS version 22 (IBM, Armonk, NY, US). All  
18  
19  
20  
21  
22  
23  
24  
25  
26  
27  
28  
29  
30  
31  
32  
33  
34  
35  
36  
37  
38  
39  
40  
41  
42  
43  
44  
45  
46  
47  
48  
49  
50  
51  
52  
53  
54  
55  
56  
57  
58  
59  
60

*P*-values were 2-tailed, and *P* < 0.05 was considered statistically significant.

Table 1 General characteristics of cases and controls stratified by sex, *n*(%)

| Variables                       | Men ( <i>n</i> =728) |                          |                              | Women( <i>n</i> =340)  |                          |                              |
|---------------------------------|----------------------|--------------------------|------------------------------|------------------------|--------------------------|------------------------------|
|                                 | Cases                | Controls( <i>n</i> =364) | <i>P</i> -value <sup>a</sup> | Cases ( <i>n</i> =170) | Controls( <i>n</i> =170) | <i>P</i> -value <sup>a</sup> |
| Age                             |                      |                          | 0.66                         |                        |                          | 0.99                         |
| <40                             | 118(32.42)           | 116(31.87)               |                              | 25(14.71)              | 22(12.94)                |                              |
| 40~60                           | 217(59.61)           | 212(58.24)               |                              | 123(72.35)             | 122(71.76)               |                              |
| ≥60                             | 29(7.97)             | 36(9.89)                 |                              | 22(12.94)              | 26(15.30)                |                              |
| Educational level               |                      |                          | 0.04                         |                        |                          | 0.75                         |
| primary school and less than    | 10(2.75)             | 23(6.32)                 |                              | 30(17.65)              | 26(15.29)                |                              |
| junior middle and high school   | 147(40.38)           | 128(35.16)               |                              | 76(44.70)              | 74(43.53)                |                              |
| junior college or above         | 207(56.87)           | 213(58.52)               |                              | 64(37.65)              | 70(41.18)                |                              |
| Occupational status             |                      |                          | 0.39                         |                        |                          | 0.43                         |
| mental labour                   | 108(29.67)           | 104(28.57)               |                              | 50(29.41)              | 48(28.24)                |                              |
| physical labor                  | 86(23.63)            | 102(28.02)               |                              | 25(14.71)              | 34(20.00)                |                              |
| other                           | 170(46.70)           | 158(43.41)               |                              | 95(55.88)              | 88(51.76)                |                              |
| Income(yuan/month)              |                      |                          | 0.35                         |                        |                          | 0.85                         |
| <2000                           | 17(4.67)             | 17(4.67)                 |                              | 15(8.82)               | 18(10.59)                |                              |
| 2000~3000                       | 87(23.90)            | 104(28.57)               |                              | 70(41.18)              | 70(41.18)                |                              |
| ≥3000                           | 260(71.43)           | 243(66.76)               |                              | 85(50.00)              | 82(48.23)                |                              |
| Marital status                  |                      |                          | 0.24                         |                        |                          | 0.52                         |
| single                          | 45(12.36)            | 56(15.38)                |                              | 4(2.35)                | 6(3.53)                  |                              |
| married or other                | 319(87.64)           | 308(84.62)               |                              | 166(97.65)             | 164(96.47)               |                              |
| Smoking status                  |                      |                          | 0.30                         |                        |                          | 0.16                         |
| never smoker                    | 199(54.67)           | 213(58.52)               |                              | 168(98.82)             | 170(100)                 |                              |
| smoker                          | 165(45.33)           | 151(41.48)               |                              | 2(1.18)                | 0(0.00)                  |                              |
| Tea-drinking status             |                      |                          | 0.30                         |                        |                          | 0.01                         |
| yes                             | 258(70.88)           | 245(63.31)               |                              | 77(45.29)              | 55(32.35)                |                              |
| no                              | 106(29.12)           | 119(32.69)               |                              | 93(54.71)              | 115(67.55)               |                              |
| Physical activity               |                      |                          | 0.02                         |                        |                          | 0.88                         |
| light                           | 175(48.08)           | 137(37.64)               |                              | 19(11.18)              | 19(11.18)                |                              |
| moderate                        | 100(27.47)           | 121(33.24)               |                              | 47(27.64)              | 43(25.29)                |                              |
| severe                          | 89(24.45)            | 106(29.12)               |                              | 104(61.18)             | 108(63.53)               |                              |
| BMI(kg/m <sup>2</sup> )         |                      |                          | 0.00                         |                        |                          | 0.00                         |
| <18.5                           | 2(0.55)              | 11(3.02)                 |                              | 1(0.59)                | 9(5.29)                  |                              |
| 18.5~24.0                       | 107(29.40)           | 257(70.61)               |                              | 72(42.35)              | 125(73.53)               |                              |
| ≥24.0                           | 255(70.05)           | 96(26.37)                |                              | 97(57.06)              | 36(21.18)                |                              |
| History of diabetes             |                      |                          | 0.67                         |                        |                          | 0.18                         |
| yes                             | 12(3.30)             | 10(2.75)                 |                              | 10(5.88)               | 5(2.94)                  |                              |
| no                              | 352(96.70)           | 354(97.25)               |                              | 160(94.12)             | 165(94.06)               |                              |
| History of hypertension         |                      |                          | 0.85                         |                        |                          | 0.63                         |
| yes                             | 15(4.12)             | 16(4.40)                 |                              | 8(4.71)                | 10(5.88)                 |                              |
| no                              | 349(95.88)           | 348(95.60)               |                              | 162(95.29)             | 160(94.12)               |                              |
| History of hyperlipidemia       |                      |                          | 0.01                         |                        |                          | 0.00                         |
| yes                             | 108(29.67)           | 77(21.15)                |                              | 51(30.00)              | 21(12.35)                |                              |
| no                              | 256(70.33)           | 287(78.85)               |                              | 119(70.00)             | 149(87.65)               |                              |
| MUFA intake,g/d <sup>b</sup>    | 34.10(28.49, 31.39)  | 26.55(26.55, 36.79)      | 0.00                         | 29.99(26.37, 36.37)    | 28.05(22.40, 31.39)      | 0.00                         |
| PUFA intake,g/d <sup>b</sup>    | 26.25(24.04, 23.90)  | 22.01(26.02)             | 0.00                         | 24.52(22.11, 27.12)    | 21.21(18.83, 24.53)      | 0.00                         |
| Energy intake,kJ/d <sup>c</sup> | 10395.64±24989.07    | 97±2348.76               | 0.01                         | 7509.73±1650.71        | 7323.78±1852.97          | 0.04                         |

<sup>a</sup>*P*-values were calculated by using the Chi-square test for categorical variables and Wilcoxon rank sum test and ANOVA test for continues variables.

<sup>b</sup>Medians (IQRs).

For peer review only - <http://bmjopen.bmj.com/site/about/guidelines.xhtml>

<sup>c</sup>Mean(s.d).

## Results

### Baseline Characteristics

Table 1 presents health-related and demographic characteristics of the NAFLD cases and matched controls. Compared with the controls, the NAFLD cases tended to have a higher BMI, higher total intake of energy, higher MUFA and PUFA consumption, and a higher number of participants with a history of hyperlipidemia among both men and women. Patients with NAFLD had a lower educational level and the men engaged in less physical activity than the controls. No statistically significant associations were found for age, occupational status, income, marital status, smoking status, history of diabetes, or hypertension between the cases and the controls.

### The associations of dietary nut intake with NAFLD

The participants' nut consumption is summarized in Table 2. Among the women, those in the NAFLD group consumed a significantly higher amount of nuts (6.80 g/d vs. 2.50 g/d;  $P = 0.02$ ) than those in the control group. No statistically significant differences were found between the cases and controls in the the sample or among the male participants. In order to adjust for potential confounding factors, quartile distributions of dietary nut consumption among the controls were used to categorize the nut intake of all the participants; the results are shown in Table 3. After adjusting for potential confounders, nut consumption was not associated with NAFLD risk among the participants in the sample. When the fully adjusted model was stratified by sex, a significant inverse association was found between nut consumption and NAFLD, but only among the men in the highest quartile (OR = 0.45; 95% CI: 0.27–0.76;  $P_{\text{trend}} = 0.01$ ).

Table 2 Comparison of nut daily intake between the case and the control

| Nut intake<br>(g/d) | Case   |           | Control |           | <i>P</i> -value <sup>a</sup> | <i>P</i> -value <sup>b</sup> |
|---------------------|--------|-----------|---------|-----------|------------------------------|------------------------------|
|                     | Median | Quartile  | Median  | Quartile  |                              |                              |
| Total population    | 3.15   | 1.46-8.80 | 2.86    | 1.22-8.98 | 0.35                         | 0.18                         |
| Men                 | 2.68   | 1.15-8.43 | 2.86    | 1.22-8.98 | 0.36                         | 0.94                         |
| Women               | 6.80   | 1.75-8.86 | 2.50    | 1.07-7.84 | 0.01                         | 0.02                         |

<sup>a</sup>*P*-values:calculated by using Wilcoxon rank sum test;before adjusting for energy.

<sup>b</sup>*P*-values :calculated by using Wilcoxon rank sum test; after adjusting for energy by using the residuals methods.

Table 3 Odds ratios (OR) and 95% confidence intervals (CI) for NAFLD in relation to nut intake

| Nut intake                    | Case<br><i>n</i> | Control<br><i>n</i> | Crude OR(95%CI) | Model 1 <sup>a</sup><br>OR(95%CI) | Model 2 <sup>a</sup><br>OR(95%CI) |
|-------------------------------|------------------|---------------------|-----------------|-----------------------------------|-----------------------------------|
| Total population <sup>b</sup> | 534              | 534                 |                 |                                   |                                   |
| Q1                            | 125              | 133                 | 1               | 1                                 | 1                                 |
| Q2                            | 112              | 134                 | 1.30(0.93-1.81) | 0.89(0.63-1.26)                   | 0.98(0.65-1.47)                   |
| Q3                            | 159              | 134                 | 1.77(1.29-2.44) | 1.26(0.90-1.77)                   | 1.16(0.78-1.72)                   |
| Q4                            | 138              | 133                 | 1.17(0.81-1.68) | 1.10(0.78-1.55)                   | 0.85(0.57-1.27)                   |
| <i>P</i> for trend*           |                  |                     | 0.46            | 0.45                              | 0.07                              |
| Men                           | 364              | 364                 |                 |                                   |                                   |
| Q1                            | 106              | 102                 | 1               | 1                                 | 1                                 |
| Q2                            | 91               | 79                  | 1.31(0.88-1.94) | 0.90(0.60-1.35)                   | 0.92(0.56-1.49)                   |
| Q3                            | 74               | 123                 | 1.81(1.24-2.65) | 1.73(1.16-2.57)                   | 1.36(0.85-2.18)                   |
| Q4                            | 93               | 60                  | 1.04(0.66-1.63) | 0.67(0.44-1.02)                   | 0.45(0.27-0.76)                   |
| <i>P</i> for trend*           |                  |                     | 0.81            | 0.04                              | 0.01                              |
| Women                         | 170              | 170                 |                 |                                   |                                   |
| Q1                            | 23               | 27                  | 1               | 1                                 | 1                                 |
| Q2                            | 33               | 43                  | 1.28(0.69-2.37) | 0.90(0.44-1.85)                   | 0.86(0.37-2.02)                   |
| Q3                            | 36               | 60                  | 1.71(0.95-3.08) | 0.70(0.35-1.41)                   | 0.56(0.25-1.28)                   |
| Q4                            | 78               | 40                  | 1.41(0.76-2.64) | 2.29(1.17-4.49)                   | 1.34(0.59-3.04)                   |
| <i>P</i> for trend*           |                  |                     | 0.36            | 0.00                              | 0.12                              |

<sup>a</sup>Model 1:Adjusted for total energy intake.

<sup>a</sup>Model 2:Adjusted further for age,income,smoking status,educational level, teaing status, occupationanl status,marital status,body mass index,physical activity,the history of diabetes,hypertension and hyperlipidemia,MUFA and PUFA intake.

<sup>b</sup>:further adiuusted for sex.

\**P* for trend: Trend across intake levels with the categorical median.

### Stratified Analyses

In the stratified analysis, the inverse association between total-nut consumption and NAFLD risk was consistent across age, sex, BMI, educational level, income, physical activity, smoking, tea drinking, and history of diabetes, hypertension, and hyperlipidemia. In addition to the association between nut consumption and NAFLD in men, we also found the highest nut-consumption category was associated with a lower risk of developing NAFLD than the reference (OR = 0.53; 95% CI: 0.31–0.93) among the participants who engaged in light and moderate physical activity. No significant interactions of total nut consumption and the potentially modifying effects of NAFLD risk factors were identified (Figure 1).

### Discussion

In this case-control study, we found a significant inverse relationship between high nut consumption and NAFLD risk among the males, but found either no or unclear associations among the females and the overall sample. Moreover, the associations seemed to be independent of other predictors, including diet and lifestyle factors. The effect of nut consumption remained among men after controlling for other known or suspected risk factors for developing NAFLD. Furthermore, no significant interactions between nut consumption and the potential modifying effects of NAFLD risk factors were identified. To the best of our knowledge, this was the first study to assess the association between nut consumption and the risk of NAFLD in a Chinese sample.

Our results are consistent with a previous study conducted in Korea, which found that a low intake of nuts and seeds (OR = 3.66;  $P_{\text{trend}} = 0.007$ ) was associated with a significantly higher risk of developing NAFLD among male participants, but not among females<sup>19</sup>. Although another case-control study found an association between

1  
2  
3 a high intake of nuts with a lower likelihood of NAFLD, after adjusting for the  
4 confounders age, sex, waist circumference, and the values of the homeostasis model  
5 assessment of insulin resistance (OR = 0.61; 95% CI: 0.38–0.98), the association  
6 disappeared after further adjustment for adiponectin and TNF- $\alpha$  (OR = 0.72; 95% CI:  
7 0.41–1.25)<sup>20</sup>. However, the study did not examine nut intake separately; therefore,  
8 the results cannot be directly compared with those of our study. Although the results  
9 of our study suggest nuts may play a protective role in the development of NAFLD in  
10 males, a significant association between nut intake and the risk of NAFLD was not  
11 found in females. NAFLD has been regarded as the “hepatic manifestation of MetS”;  
12 therefore, our findings are indirectly supported by several studies showing an inverse  
13 correlation between high nut intake and the risk of T2D and cardiovascular disease,  
14 which share common metabolic parameters with NAFLD<sup>21-23</sup>. Nevertheless, the  
15 relationship between nut intake and NAFLD warrants further exploration, and  
16 additional studies are needed to examine gender differences in the association  
17 between nut consumption and NAFLD, and its’ possible mechanisms should be  
18 explored.

19  
20  
21  
22  
23  
24  
25  
26  
27  
28  
29  
30  
31  
32  
33  
34  
35  
36  
37  
38  
39  
40 Several biological pathways have been proposed to explain the association  
41 between nut intake and NAFLD risk. Ellagic acid, a natural antioxidant polyphenol  
42 found in nuts, can suppress oxidative stress and inflammation<sup>24</sup> and improve hepatic  
43 insulin sensitivity and lipid metabolism<sup>25</sup>. Vitamin E and selenium in almonds and  
44 walnuts, as well as folic acid and resveratrol in pine nuts, have been reported to have  
45 beneficial effects on NAFLD. Numerous trials testing the therapeutic value of vitamin  
46 E in NAFLD prevention found that Vitamin E significantly improved liver function  
47 and histologic changes by significantly reducing aspartate aminotransferase, alanine  
48 aminotransferase, steatosis, and inflammation in patients with NAFLD/non-alcoholic  
49  
50  
51  
52  
53  
54  
55  
56  
57  
58  
59  
60

1  
2  
3 steatohepatitis (NASH) <sup>26</sup>. Selenium is an antioxidant agent, and selenium deficiency  
4 is associated with insulin resistance in patients with chronic liver disease <sup>27</sup>. Folate  
5 plays an essential role in lipid metabolism and folic acid supplementation can  
6 attenuate steatosis and improve oxidative stress in rodent models of NAFLD. Folate  
7 can also blunt the increase of inflammatory cytokines secreted by immune cells <sup>28</sup>.  
8 Resveratrol has antioxidant, anti-apoptotic, and anti-inflammatory properties in  
9 NAFLD patients <sup>29</sup>. Nuts, which are known to be rich in unsaturated fatty acids, are  
10 especially rich in n-3 PUFAs, a source of alpha-linolenic acid, which lowers LDL  
11 cholesterol <sup>30</sup>, and has been found to have beneficial effects on NAFLD <sup>31</sup>. Each type  
12 of nut has many nutrients and phytochemicals that may be beneficial to health, and it  
13 is likely that unknown salubrious effects of nuts may be related to NAFLD prevention.  
14 Moreover, many studies have shown a beneficial association between high nut intake  
15 and decreased risk of obesity <sup>32</sup>, T2D <sup>33</sup>, and MetS <sup>34</sup>, which are risk factors for  
16 NAFLD.

17  
18  
19  
20  
21  
22  
23  
24  
25  
26  
27  
28  
29  
30  
31  
32  
33  
34  
35 Our study has both strengths and limitations. The first strength is the large sample  
36 size, which may have reduced type II errors. Second, the collection of data using  
37 face-to-face interviews and a semi-quantitative food frequency questionnaire, which  
38 elicited extensive information on anthropometrics and lifestyle factors, allowed us to  
39 adjust for confounding factors. Finally, the study had sufficient power to investigate  
40 interactions between nut intake and other risk factors, for which a biologically  
41 plausible mechanism may exist. Nonetheless, several limitations should be considered  
42 when interpreting the study's findings. First, although we accounted for a wide range  
43 of socioeconomic characteristics and lifestyle factors, we cannot exclude the effects of  
44 unknown or poorly measured confounding variables or residual confounding  
45 attributable to other dietary/lifestyle factors, which might have influenced the  
46  
47  
48  
49  
50  
51  
52  
53  
54  
55  
56  
57  
58  
59  
60

1  
2  
3 observed associations. However, the associations persisted even after controlling for  
4 known and suspected predictors of NAFLD. Second, the intake of nuts was assessed  
5 by asking about using one question; therefore, we could not investigate the effects of  
6 different types of nuts, such as peanuts and walnuts, which contain different amounts  
7 of energy, fat content, and other nutrients<sup>35</sup>. Third, we did not consider manufacturing  
8 methods (e.g., raw, roasted, or boiled) or extra ingredients (e.g., sugar, salt, seasoning).  
9 Different preparation methods before and after roasting, the amount of time roasted,  
10 and the temperature used can affect the nutrient composition and ingredients in the  
11 nuts<sup>36, 37</sup>. Fourth, because we used a case-control study design, recall bias is an  
12 inherent limitation. People who are health-conscious may over-report or under-report  
13 some food items. However, the protective effect of nuts on NAFLD was not generally  
14 known at the time of the survey, and thus, should be unrelated to recall bias. Finally,  
15 due to the small number of participants in the highest nut-intake category, we cannot  
16 rule out the possibility that some of our results are due to chance. However, the  
17 associations were consistent in the analyses stratified by some of the other factors,  
18 which reduces the likelihood of chance findings. In these stratified analyses, the  
19 statistical power needed to detect differences was limited by the sample size, and such  
20 analyses should be considered exploratory.

21  
22  
23  
24  
25  
26  
27  
28  
29  
30  
31  
32  
33  
34  
35  
36  
37  
38  
39  
40  
41  
42  
43  
44  
45 Our study had a retrospective design, which is lower on the evidence hierarchy than  
46 prospective studies. Nevertheless, case-control studies can provide evidence  
47 supporting the general relationship between diet and NAFLD, as there currently are  
48 no available prospective studies.

49  
50  
51  
52  
53  
54 In conclusion, this case-control study indicated that high nut intake was associated  
55 with a significantly reduced risk of NAFLD among Han men in China. However, no  
56 relationship was found between total nut intake and NAFLD risk among the Han  
57  
58  
59  
60



1  
2  
3 women. Our data contribute to the growing evidence showing that a relatively simple  
4 prevention strategy of incorporating a modest amount of nuts in the diet may  
5 contribute to maintaining good health at both the individual and population levels.  
6  
7  
8  
9  
10  
11  
12  
13  
14  
15  
16  
17  
18  
19  
20  
21  
22  
23  
24  
25  
26  
27  
28  
29  
30  
31  
32  
33  
34  
35  
36  
37  
38  
39  
40  
41  
42  
43  
44  
45  
46  
47  
48  
49  
50  
51  
52  
53  
54  
55  
56  
57  
58  
59  
60

For peer review only

## Acknowledgements

We thank all study participants for their cooperation. We also thank our staff for recruiting participants and for their technical assistance.

## Contributors

BBC and YH are joint first authors. XEP obtained funding. XEP, XL and SHX designed the study. XTP, JHY, YFL and WJL collected the data. BBC and YH were involved in data cleaning and verification. BBC and XTP analyzed the data. BBC and YH drafted the manuscript. XEP, YFL and JHY contributed to the interpretation of the results and critical revision of the manuscript for important intellectual content and approved the final version of the manuscript. All authors have read and approved the final manuscript.

## Data sharing

No additional data are available.

## Conflict of Interest

The authors declare that they have no conflict of interest.

## Funding

This work was supported by the National Natural Science Foundation of China [grant number 81473047], the Training Program Foundation for Middle-aged and Young Talents from the Sanitation System of Fujian Province [grant number 2014-ZQN-ZD-23], and the Joint Innovation Project of Science and Technology of Fujian Province [grant number 2017Y9104].

## References

- 1 Maurice J, Manousou P. Non-alcoholic fatty liver disease. *Clin Med (Lond)* 2018; **18(3)**: 245-250.
- 2 Rietman A, Sluik D, Feskens E, Kok F, Mensink M. Associations between dietary factors and markers of NAFLD in a general Dutch adult population. *Eur J Clin Nutr* 2018; **72(1)**: 117-123.
- 3 Fan J. Epidemiology of alcoholic and nonalcoholic fatty liver disease in China. *J Gastroenterol. Hepatol.* 2013; **28 Suppl 1**: 11-17.
- 4 Katsagoni C, Georgoulis M, Papatheodoridis G, Panagiotakos D, Kontogianni M. Effects of lifestyle interventions on clinical characteristics of patients with non-alcoholic fatty liver disease: A meta-analysis. *Metab. Clin. Exp.* 2017; **68**: 119-132.
- 5 Zelber-Sagi S, Salomone F, Mlynarsky L. The Mediterranean dietary pattern as the diet of choice for non-alcoholic fatty liver disease: Evidence and plausible mechanisms. *Liver Int.* 2017; **37(7)**: 936-949.
- 6 Kosmidou M, Milionis H. Diabetes mellitus and non-alcoholic fatty liver disease: the thread of Ariadne. *Minerva Endocrinol.* 2017; **42(2)**: 109-121.
- 7 Petrović G, Bjelaković G, Benedeto-Stojanov D, Nagorni A, Brzački V, Marković-Živković B. Obesity and metabolic syndrome as risk factors for the development of non-alcoholic fatty liver disease as diagnosed by ultrasound. *Vojnosanit Pregl* 2016; **73(10)**: 910-920.
- 8 Ros E. Health benefits of nut consumption. *Nutrients* 2010; **2(7)**: 652-682.

- 1  
2  
3  
4 9 Lee J, Shin A, Oh JH, Kim J. The relationship between nut intake and risk of  
5  
6 colorectal cancer: a case control study. *Nutr J* 2018; **17**(1): 37.  
7  
8  
9 10 Lahong J, Dongmei Y, Xiaoli X. Status and variation trend of nut intake among  
10  
11 Chinese residents,2010-2012. *Chin J Public Health* 2017; **33**(6): 916-918.  
12  
13  
14 11 Larsson S, Drca N, Björck M, Bäck M, Wolk A. Nut consumption and incidence  
15  
16 of seven cardiovascular diseases. *Heart* 2018.  
17  
18  
19 12 Asghari G, Ghorbani Z, Mirmiran P, Azizi F. Nut consumption is associated with  
20  
21 lower incidence of type 2 diabetes: The Tehran Lipid and Glucose Study. *Diabetes*  
22  
23 *Metab.* 2017; **43**(1): 18-24.  
24  
25  
26  
27 13 O'Neil C, Fulgoni V, Nicklas T. Tree Nut consumption is associated with better  
28  
29 adiposity measures and cardiovascular and metabolic syndrome health risk factors in  
30  
31 U.S. Adults: NHANES 2005-2010. *Nutr J* 2015; **14**: 64.  
32  
33  
34  
35 14 Casas-Agustench P, López-Uriarte P, Bulló M, Ros E, Cabré-Vila J, Salas-Salvadó  
36  
37 J. Effects of one serving of mixed nuts on serum lipids, insulin resistance and  
38  
39 inflammatory markers in patients with the metabolic syndrome. *Nutr Metab*  
40  
41 *Cardiovasc Dis* 2011; **21**(2): 126-135.  
42  
43  
44  
45 15 Hernández-Alonso P, Salas-Salvadó J, Baldrich-Mora M, Juanola-Falgarona M,  
46  
47 Bulló M. Beneficial effect of pistachio consumption on glucose metabolism, insulin  
48  
49 resistance, inflammation, and related metabolic risk markers: a randomized clinical  
50  
51 trial. *Diabetes Care* 2014; **37**(11): 3098-3105.  
52  
53  
54  
55  
56 16 Grosso G, Yang J, Marventano S, Micek A, Galvano F, Kales S. Nut consumption  
57  
58 on all-cause, cardiovascular, and cancer mortality risk: a systematic review and  
59  
60

1  
2  
3  
4 meta-analysis of epidemiologic studies. *Am. J. Clin. Nutr.* 2015; **101**(4): 783-793.

5  
6  
7 17 Dreher M, Maher C, Kearney P. The traditional and emerging role of nuts in  
8  
9 healthful diets. *Nutr. Rev.* 1996; **54**(8): 241-245.

10  
11  
12 18 Ke L, Toshiro T, Fengyan S, Ping Y, Xiaoling D, Kazuo T. Relative validity of a  
13  
14 semi-quantitative food frequency questionnaire versus 3 day weighed diet records in  
15  
16 middle-aged inhabitants in Chaoshan area, China. *Asian Pac J Cancer Prev* 2005;  
17  
18 **6**(3): 376-381. e-pub ahead of print 2005/10/21.

19  
20  
21  
22 19 Han JM, Jo AN, Lee SM, Bae HS, Jun DW, Cho YK *et al.* Associations between  
23  
24 intakes of individual nutrients or whole food groups and non-alcoholic fatty liver  
25  
26 disease among Korean adults. *Journal of Gastroenterology and Hepatology* 2014;  
27  
28 **29**(6): 1265-1272.

29  
30  
31  
32 20 Katsagoni C, Georgoulis M, Papatheodoridis G, Fragopoulou E, Ioannidou P,  
33  
34 Papageorgiou M *et al.* Associations Between Lifestyle Characteristics and the  
35  
36 Presence of Nonalcoholic Fatty Liver Disease: A Case-Control Study. *Metab Syndr*  
37  
38 *Relat Disord* 2017; **15**(2): 72-79.

39  
40  
41  
42 21 Edens M, Kuipers F, Stolk R. Non-alcoholic fatty liver disease is associated with  
43  
44 cardiovascular disease risk markers. *Obes Rev* 2009; **10**(4): 412-419.

45  
46  
47  
48 22 Lonardo A, Ballestri S, Guaraldi G, Nascimbeni F, Romagnoli D, Zona S *et al.*

49  
50 Fatty liver is associated with an increased risk of diabetes and cardiovascular disease -  
51  
52 Evidence from three different disease models: NAFLD, HCV and HIV. *World J.*  
53  
54 *Gastroenterol.* 2016; **22**(44): 9674-9693.

55  
56  
57  
58 23 Gastaldelli A. Insulin resistance and reduced metabolic flexibility: cause or  
59  
60

1  
2  
3  
4 consequence of NAFLD? *Clin. Sci.* 2017; **131**(22): 2701-2704.

5  
6 24 Panchal SK, Ward L, Brown L. Ellagic acid attenuates high-carbohydrate, high-fat  
7  
8 diet-induced metabolic syndrome in rats. *Eur J Nutr* 2013; **52**(2): 559-568.

9  
10  
11 25 Polce S, Burke C, França L, Kramer B, de Andrade Paes A, Carrillo-Sepulveda M.  
12  
13 Ellagic Acid Alleviates Hepatic Oxidative Stress and Insulin Resistance in Diabetic  
14  
15 Female Rats. *Nutrients* 2018; **10**(5): 1-15.

16  
17 26 Sato K, Gosho M, Yamamoto T, Kobayashi Y, Ishii N, Ohashi T *et al.* Vitamin E  
18  
19 has a beneficial effect on nonalcoholic fatty liver disease: a meta-analysis of  
20  
21 randomized controlled trials. *Nutrition* 2015; **31**(7-8): 923-930.

22  
23 27 Himoto T, Yoneyama H, Kurokohchi K, Inukai M, Masugata H, Goda F *et al.*  
24  
25 Selenium deficiency is associated with insulin resistance in patients with hepatitis C  
26  
27 virus-related chronic liver disease. *Nutr Res* 2011; **31**(11): 829-835.

28  
29 28 Sid V, Siow Y, O K. Role of folate in nonalcoholic fatty liver disease. *Can. J.*  
30  
31 *Physiol. Pharmacol.* 2017; **95**(10): 1141-1148.

32  
33 29 Hajighasem A, Farzanegi P, Mazaheri Z. Effects of combined therapy with  
34  
35 resveratrol, continuous and interval exercises on apoptosis, oxidative stress, and  
36  
37 inflammatory biomarkers in the liver of old rats with non-alcoholic fatty liver disease.  
38  
39 *Arch. Physiol. Biochem.* 2018: 1-8.

40  
41 30 Jeznach-Steinhagen A, Ostrowska J, Czerwonogrodzka-Senczyna A, Boniecka I,  
42  
43 Gronostajska W. [Dietary recommendation for non-alcoholic fatty liver disease].  
44  
45 *Pol. Merkur. Lekarski* 2017; **43**(258): 281-286.

46  
47 31 Musa-Veloso K, Venditti C, Lee H, Darch M, Floyd S, West S *et al.* Systematic  
48  
49  
50  
51  
52  
53  
54  
55  
56  
57  
58  
59  
60

1  
2  
3  
4 review and meta-analysis of controlled intervention studies on the effectiveness of  
5  
6 long-chain omega-3 fatty acids in patients with nonalcoholic fatty liver disease. *Nutr.*  
7  
8  
9 *Rev.* 2018; **0(0)**: 1-22.

10  
11 32 Mohammadifard N, Yazdekhashti N, Stangl G, Sarrafzadegan N. Inverse  
12  
13 association between the frequency of nut consumption and obesity among Iranian  
14  
15 population: Isfahan Healthy Heart Program. *Eur J Nutr* 2015; **54(6)**: 925-931.

16  
17 33 Hernández-Alonso P, Camacho-Barcia L, Bulló M, Salas-Salvadó J. Nuts and  
18  
19 Dried Fruits: An Update of Their Beneficial Effects on Type 2 Diabetes. *Nutrients*  
20  
21  
22 2017; **9(7)**: 673.

23  
24 34 Hosseinpour-Niazi S, Hosseini S, Mirmiran P, Azizi F. Prospective Study of Nut  
25  
26 Consumption and Incidence of Metabolic Syndrome: Tehran Lipid and Glucose  
27  
28 Study. *Nutrients* 2017; **9(10)**: 1056.

29  
30 35 Wu L, Wang Z, Zhu J, Murad AL, Prokop LJ, Murad MH. Nut consumption and  
31  
32 risk of cancer and type 2 diabetes: a systematic review and meta-analysis. *Nutr Rev*  
33  
34 2015; **73(7)**: 409-425.

35  
36 36 Schlörmann W, Birringer M, Böhm V, Löber K, Jahreis G, Lorkowski S *et al.*  
37  
38 Influence of roasting conditions on health-related compounds in different nuts. *Food*  
39  
40  
41 *Chem* 2015; **180**: 77-85.

42  
43 37 Hosseini Bai S, Darby I, Nevenimo T, Hannel G, Hannel D, Poienou M *et al.*  
44  
45 Effects of roasting on kernel peroxide value, free fatty acid, fatty acid composition  
46  
47 and crude protein content. *PLoS ONE* 2017; **12(9)**: e0184279.

### Figure legends

Figure 1. Odds ratios (OR) and 95% CIs for NAFLD across the strata of various factors.

The forest plot represents the ORs of the comparison of the lowest nut-intake category versus the highest nut-intake category, adjusting for age, income, smoking status, educational level, tea-drinking status, occupational status, marital status, BMI, physical activity, history of diabetes, hypertension and hyperlipidemia, total energy intake, and MUFA and PUFA intake.  $P$ -values are two-tailed;  $P_{inter}$  indicates  $P$  for the interaction between strata and nut intake;  $P_{trend}$  indicates  $P$  for the trend across levels of nut intake.



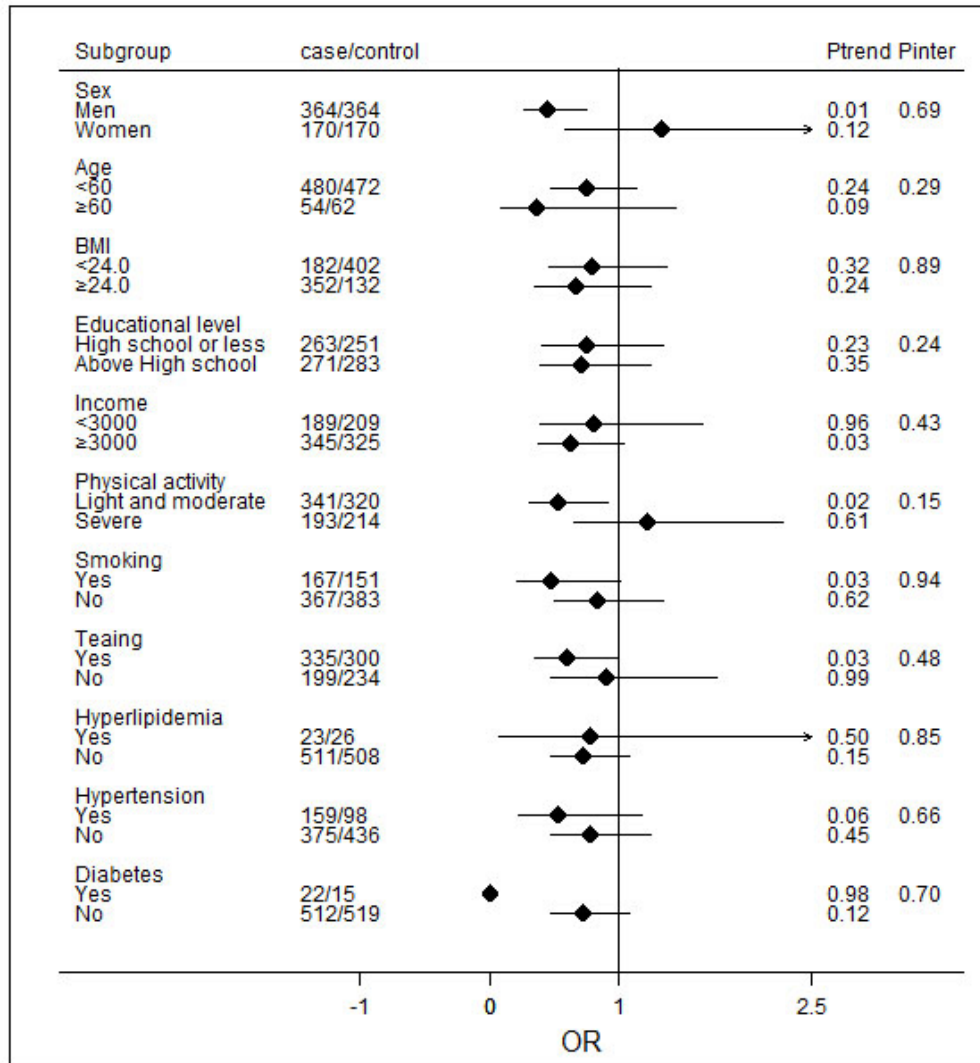

Figure 1. Odds ratios (OR) and 95% CIs for NAFLD across the strata of various factors. The forest plot represents the ORs of the comparison of the lowest nut-intake category versus the highest nut-intake category, adjusting for age, income, smoking status, educational level, tea-drinking status, occupational status, marital status, BMI, physical activity, history of diabetes, hypertension and hyperlipidemia, total energy intake, and MUFA and PUFA intake. P-values are two-tailed; Pinter indicates P for the interaction between strata and nut intake; Ptrend indicates P for the trend across levels of nut intake.

148x159mm (96 x 96 DPI)

# BMJ Open

## Association between nut intake and Non-alcoholic fatty liver disease risk: a retrospective case-control study in a sample of Chinese Han adults

|                                 |                                                                                                                                                                                                                                                                                                                                                                                                                                                                                                                                                                                                                                                                                                                                                                                                                                                                                                                                                                                                                                                                                                                                                                                                                                                                                    |
|---------------------------------|------------------------------------------------------------------------------------------------------------------------------------------------------------------------------------------------------------------------------------------------------------------------------------------------------------------------------------------------------------------------------------------------------------------------------------------------------------------------------------------------------------------------------------------------------------------------------------------------------------------------------------------------------------------------------------------------------------------------------------------------------------------------------------------------------------------------------------------------------------------------------------------------------------------------------------------------------------------------------------------------------------------------------------------------------------------------------------------------------------------------------------------------------------------------------------------------------------------------------------------------------------------------------------|
| Journal:                        | <i>BMJ Open</i>                                                                                                                                                                                                                                                                                                                                                                                                                                                                                                                                                                                                                                                                                                                                                                                                                                                                                                                                                                                                                                                                                                                                                                                                                                                                    |
| Manuscript ID                   | bmjopen-2019-028961.R1                                                                                                                                                                                                                                                                                                                                                                                                                                                                                                                                                                                                                                                                                                                                                                                                                                                                                                                                                                                                                                                                                                                                                                                                                                                             |
| Article Type:                   | Research                                                                                                                                                                                                                                                                                                                                                                                                                                                                                                                                                                                                                                                                                                                                                                                                                                                                                                                                                                                                                                                                                                                                                                                                                                                                           |
| Date Submitted by the Author:   | 27-Apr-2019                                                                                                                                                                                                                                                                                                                                                                                                                                                                                                                                                                                                                                                                                                                                                                                                                                                                                                                                                                                                                                                                                                                                                                                                                                                                        |
| Complete List of Authors:       | Chen, Bing bing; Fujian Medical University, Han, Ying; The First Affiliated Hospital of Fujian Medical University Pan, Xinting; Department of Epidemiology and Health Statistics, Fujian Provincial Key Laboratory of Environment Factors and Cancer, School of Public Health, Fujian Medical University<br>Yan, Jianhui; Department of Epidemiology and Health Statistics, Fujian Provincial Key Laboratory of Environment Factors and Cancer, School of Public Health, Fujian Medical University<br>Liu, Wenjuan; Department of Epidemiology and Health Statistics, Fujian Provincial Key Laboratory of Environment Factors and Cancer, School of Public Health, Fujian Medical University<br>li, yangfan; Department of Epidemiology and Health Statistics, Fujian Provincial Key Laboratory of Environment Factors and Cancer, School of Public Health, Fujian Medical University, Fujian, China, ;<br>lin, xu; Key Laboratory of Ministry of Education for Gastrointestinal Cancer, Fujian Medical University, Fujian, China<br>xu, shanghua; Department of Cardiology, Affiliated Nanping First Hospital, Fujian Medical University, Nanping, China<br>Peng, Xian-E; Key Laboratory of Ministry of Education for Gastrointestinal Cancer, Fujian Medical University, Fujian, |
| <b>Primary Subject Heading</b>: | Epidemiology                                                                                                                                                                                                                                                                                                                                                                                                                                                                                                                                                                                                                                                                                                                                                                                                                                                                                                                                                                                                                                                                                                                                                                                                                                                                       |
| Secondary Subject Heading:      | Nutrition and metabolism, Public health                                                                                                                                                                                                                                                                                                                                                                                                                                                                                                                                                                                                                                                                                                                                                                                                                                                                                                                                                                                                                                                                                                                                                                                                                                            |
| Keywords:                       | EPIDEMIOLOGY, NUTRITION & DIETETICS, Lipid disorders < DIABETES & ENDOCRINOLOGY                                                                                                                                                                                                                                                                                                                                                                                                                                                                                                                                                                                                                                                                                                                                                                                                                                                                                                                                                                                                                                                                                                                                                                                                    |
|                                 |                                                                                                                                                                                                                                                                                                                                                                                                                                                                                                                                                                                                                                                                                                                                                                                                                                                                                                                                                                                                                                                                                                                                                                                                                                                                                    |

SCHOLARONE™  
Manuscripts

1  
2  
3 **Association between nut intake and Non-alcoholic fatty liver disease risk: a**  
4 **retrospective case-control study in a sample of Chinese Han adults**  
5  
6

7 Bingbing Chen<sup>1#</sup>, Ying Han<sup>2#</sup>, Xinting Pan<sup>1</sup>, Jianhui Yan<sup>1</sup>, Wenjuan Liu<sup>1</sup>, Yangfan Li<sup>1</sup>, Xu Lin<sup>3</sup>,  
8 Shanghua Xu<sup>4</sup>, Xian-e Peng<sup>1,3\*</sup>  
9

10 <sup>1</sup> Department of Epidemiology and Health Statistics, Fujian Provincial Key  
11 Laboratory of Environment Factors and Cancer, School of Public Health, Fujian  
12 Medical University, Fujian, China;  
13  
14

15  
16  
17 <sup>2</sup> The First Affiliated Hospital of Fujian Medical University  
18

19 <sup>3</sup> Key Laboratory of Ministry of Education for Gastrointestinal Cancer, Fujian  
20 Medical University, Fujian, China;  
21  
22

23  
24 <sup>4</sup> Department of Cardiology, Affiliated Nanping First Hospital, Fujian Medical  
25 University, Nanping, China  
26  
27

28 <sup>#</sup> Both authors contributed equally to this work.  
29

30 <sup>\*</sup> Corresponding author. Xian-E Peng, Department of Epidemiology and Health  
31 Statistics, Fujian Provincial Key Laboratory of Environment Factors and Cancer,  
32 School of Public Health, Fujian Medical University, Fujian, China, 3501018  
33  
34  
35  
36  
37  
38  
39  
40  
41  
42  
43  
44  
45  
46  
47  
48  
49  
50  
51  
52  
53  
54  
55  
56  
57  
58  
59  
60  
Phone: +86-0591 22862648; E-mail: fmuxe@163.com

**Running title:** Nut intake and non-alcoholic fatty liver disease

**Word count:** 2823

## Abstract

**Objectives:** Nut consumption has been associated with a lower risk of type 2 diabetes, metabolic syndrome, and insulin resistance. However, its effect on the risk of non-alcoholic fatty liver disease (NAFLD) is unknown. Therefore, we investigated the relationship between nut consumption and NAFLD risk.

**Setting and participants:** We conducted a retrospective case-control study including 534 patients diagnosed with NAFLD and 534 controls matched by sex and age ( $\pm 5$ ) from the Affiliated Nanping First Hospital of Fujian Medical University in China.

**Main outcome measures:** Information on dietary intake was collected using a semi-quantitative food frequency questionnaires and nut consumption was calculated. Nut consumption was categorized using quartiles based on the distribution of daily nut intake of the controls. Binary logistic regression models were used to estimate odds ratio (ORs) and the 95% confidence intervals (CIs) for the association between nut consumption and NAFLD risk.

**Results:** After adjusting for potential confounding variables, nut consumption was not associated with NAFLD risk in the overall sample. When the fully adjusted model was stratified by sex, a significant inverse association was found between high nut consumption and NAFLD only among the men in the highest quartile (OR = 0.45; 95% CI: 0.27–0.76;  $P_{\text{trend}} = 0.01$ ). The inverse association of nut consumption with NAFLD risk in men remained significant after controlling for other known or suspected risk factors for NAFLD.

**Conclusions:** Diets with a higher intake of nuts may be associated with a decreased risk of NAFLD, particularly in men.

### Strengths and limitations of this study

1. This study had a considerable sample size and several potential confounding variables such as energy intake and physical activity, were taken into account.

2. The study had sufficient power to investigate interactions between nut intake and other risk factors, for which a biologically plausible mechanism may exist.

3. This study was a case-control design, thus the causal association between nut intake and NAFLD could not be precisely identified.

4. This study was a case-control study, recall bias was inevitable and randomized controlled trial studies are therefore required for more accurate results.

### Introduction

Non-alcoholic fatty liver disease (NAFLD) is defined as macrovesicular steatosis in  $\geq 5\%$  of hepatocytes, in the absence of a secondary cause, such as alcohol or drug use. NAFLD has become a leading cause of chronic liver disease, with a 25% prevalence worldwide<sup>1</sup>. Furthermore, a fatty liver is more prevalent in men compared with women<sup>2</sup>. The prevalence of NAFLD among the adults in China's general population is approximately 15% (6.3–27.0%), depending on the population studied<sup>3</sup>. Many studies suggest that diet and lifestyle may significantly influence the risk of NAFLD<sup>4,5</sup>. These studies indicate that type 2 diabetes (T2D)<sup>6</sup>, metabolic syndrome (MetS), obesity<sup>7</sup>, physical activity, and a high-fat diet<sup>4</sup> are associated with an increased risk for the development of NAFLD.

Nuts are nutrient-dense foods with complex matrices rich in unsaturated fatty and other bioactive compounds (e.g., high-quality vegetable protein, fiber, minerals, tocopherols, phytosterols, and phenolic compounds)<sup>8</sup>. The global intake of nuts has increased by 59% over the past decade<sup>9</sup>. China's per capita intake of nuts was 2.2 g/day in 1982, and increased to 3.8g/day in 2012<sup>10</sup>. Although they are high in fat and

1  
2  
3 energy dense, a high intake of nuts has been associated with several health benefits,  
4 including reduced risk of cardiovascular disease <sup>11</sup>, T2D <sup>12</sup>, MetS<sup>13</sup>, and insulin  
5 resistance<sup>14</sup> <sup>15</sup>. Moreover, nuts have antioxidative effects by decreasing lipid  
6 peroxidation and protecting against oxidative DNA damage <sup>16</sup>. Beneficial health  
7 effects have been attributed to the macronutrient and micronutrient profiles of nuts <sup>17</sup>.

14  
15 NAFLD is regarded as the “hepatic manifestation of MetS.” Few studies have  
16 assessed the effects of nut intake on NAFLD, despite previous findings of an inverse  
17 correlation between high nut consumption and the risk of T2D and cardiovascular  
18 disease. In this study, we analyzed the association between nut intake and NAFLD  
19 risk and the interactions between nut intake and other established NAFLD risk factors  
20 in a large case-control study with a sample of Han adults in China.

## 28 **Methods**

### 31 **Study design**

32  
33 We conducted the retrospective case-control study in a health examination center at  
34 the Affiliated Nanping First Hospital of Fujian Medical University from April 2015 to  
35 August 2017. Data were obtained from subjects who underwent routine health  
36 examination in the examination center. Patients newly diagnosed with NAFLD using  
37 abdominal ultrasonography in accordance with the “Guidelines for the diagnosis and  
38 management of nonalcoholic fatty liver disease: update 2010” were included in the  
39 study. Hepatic ultrasonography examination was performed by trained  
40 ultrasonographers who were blinded to the clinical and laboratory data. Hepatic  
41 steatosis was diagnosed by characteristic echo patterns according to conventional  
42 criteria, such as the evidence of diffuse hyper-echogenicity of the liver relative to the  
43 kidneys, ultrasound beam attenuation, and poor visualization of intrahepatic  
44 structures.

### Sample size calculation

This study is a case-control design, thus we estimate the sample size based on the Case-control study formula. By consulting the literature<sup>18</sup>, we estimate  $OR=0.74$ ,  $p_0=0.8$ , the calculated sample size was  $N_{case}=N_{control}=489$ . Finally 1068 subjects (534 cases and 534 controls) were recruited in this study.

### Outcome--eligibility of NAFLD cases and controls

All participants were of Chinese Han ethnicity. The cases were newly diagnosed with NAFLD. The exclusion criteria were as follows: (a) daily alcohol intake of  $>40$  g (men) and  $>20$  g (women), (b) a history of other liver diseases including drug-induced liver disease, viral hepatitis, autoimmune hepatitis, total parenteral nutrition, and hepatolenticular degeneration, (c) taking hypolipidemic or weight reduction drugs, (d) age  $<18$  or  $>70$  years, (e) non-resident of Nanping, or (f) not of Han ethnicity. Adults who reported extremely abnormal levels of energy intake (2 511.60 kJ [600 kcal] or 17 581.20 kJ [4 200 kcal] per day for men; 2 093 kJ [500 kcal] or 14,651.00 kJ [3500 kcal] per day for women), and those who did not answer 25 or more food-related items or questions about nut intake on the questionnaire, were excluded from the study.

The controls were randomly selected from the same center during the study period. Their eligibility criteria were identical to those of the cases, except for the requirement of a diagnosis of liver steatosis; they were frequency-matched with cases by age (within 5-yr intervals), gender, ethnicity, and region of origin.

### Potential confounders--Data measurements and data collection

Trained interviewers performed a comprehensive medical history on each participant that included eliciting information about their demographic and socio-economic characteristics (e.g., age, gender, education, income, marriage status

1  
2  
3 and history of diabetes, hypertension, hyperlipidemia and ), lifestyle habits (e.g.,  
4 smoking, drinking (alcohol), tea drinking, and physical activity), anthropometric  
5 assessment (e.g., height, body weight and blood pressure). The data were obtained  
6 from participants using structured questionnaires during face-to-face interviews.  
7  
8  
9

### 10 11 12 **Exposure-Nut consumption**

13  
14 Information about participants' typical food consumption was collected using a  
15 semi-quantitative food frequency questionnaire that included 110 food items, which  
16 was developed and validated in a sample from southern China <sup>19</sup>. Participants were  
17 asked to estimate the average frequency of consumption of selected foods using the  
18 following response options: rarely, <once/month, 1–3 times/month, 1–2 times/week,  
19 3–4 times/week, 5–6 times/week, once/day, twice/day, and >twice/day. Nut intake  
20 was defined as the consumption of “peanuts, walnuts, seeds, or other nuts.” Data from  
21 a semi-quantitative food frequency questionnaire were used to calculate daily nut and  
22 energy intake. Nut consumption was converted to grams/day by multiplying the  
23 food-intake frequency by fixed portion sizes. Nutrient intake, such as  
24 mono-unsaturated fatty acids (MUFAs) and poly-unsaturated fatty acids (PUFAs)  
25 were calculated by multiplying the intake frequency of each food by the nutrient  
26 content of the specified portion, and summing the products of all the food items.  
27  
28  
29  
30  
31  
32  
33  
34  
35  
36  
37  
38  
39  
40  
41  
42  
43  
44

### 45 **Statistical analyses**

46  
47 Participants' characteristics were analyzed using Pearson's Chi-square test for  
48 categorical variables, and Wilcoxon's rank-sum test and ANOVA for continuous  
49 variables. Nut consumption was categorized by quartiles based on the distribution of  
50 daily nut intake by the controls (Q1-Q4). Binary logistic regression models were used  
51 to estimate the odds ratios (ORs) and their 95% confidence intervals (CIs) for the  
52 associations between nut consumption and NAFLD risk. To account for the energy  
53  
54  
55  
56  
57  
58  
59  
60



1  
2  
3 content of the nut, our initial model adjusted for total energy intake by using the  
4 residuals method. The final model adjusted for potential confounders, including age,  
5 income, smoking status, educational level, and tea-drinking status, occupational status,  
6 marital status, body mass index (BMI), physical activity, and history of diabetes,  
7 hypertension, and hyperlipidemia. The final model also adjusted for MUFA and  
8 PUFA intake to control for their effects. The selection of covariates for the final  
9 model was based on clinical significance, results of previous studies. We tested for  
10 linear trends across categories of nut intake by assigning each participant the median  
11 value for each category and modeling this value as a continuous variable, consistent  
12 with prior studies<sup>20-22</sup>.

13  
14 We evaluated the influence of nut consumption across strata of other potential  
15 confounders, comparing participants in the highest nut-consumption category to the  
16 lowest nut-consumption category(reference). We also analyzed the interactions of nut  
17 consumption with age, sex, BMI, smoking status, educational level, tea-drinking  
18 status, and other factors. We used the medians of the continuous variables to  
19 categorize them and evaluate the interactions. The criteria for statistical significance  
20 of the likelihood-ratio test of interaction effects was  $P < 0.05$ . Statistical analyses  
21 were performed using SPSS version 22 (IBM, Armonk, NY, US). All P-values were  
22 2-tailed, and  $P < 0.05$  was considered statistically significant.

### 23 24 25 26 27 28 29 30 31 32 33 34 35 36 37 38 39 40 41 42 43 44 45 46 47 **Patient and public involvement statement**

48  
49 The study was approved by the local ethics committees of Fujian Medical  
50 University (ethics number 2014096). All methods were performed in accordance with  
51 the relevant guidelines and regulations. In addition, each subject gave written informed  
52 consent before participation in the study.

## Results

### Baseline Characteristics

Table 1 presents health-related and demographic characteristics of the NAFLD cases and matched controls. Compared with the controls, the NAFLD cases tended to have a higher BMI, higher total intake of energy, higher MUFA and PUFA consumption, and a higher number of participants with a history of hyperlipidemia among both men and women. Patients with NAFLD had a lower educational level and the men engaged in less physical activity than the controls. No statistically significant associations were found for age, occupational status, income, marital status, smoking status, history of diabetes, or hypertension between the cases and the controls.

Table 1 General characteristics of cases and controls stratified by sex, n(%)

| Variables                       | Men (n=728)         |                     |                      | Women(n=340)        |                     |                      |
|---------------------------------|---------------------|---------------------|----------------------|---------------------|---------------------|----------------------|
|                                 | Cases               | Controls(n=364)     | P-value <sup>a</sup> | Cases (n=170)       | Controls(n=170)     | P-value <sup>a</sup> |
| Age                             |                     |                     | 0.66                 |                     |                     | 0.99                 |
| <40                             | 118(32.42)          | 116(31.87)          |                      | 25(14.71)           | 22(12.94)           |                      |
| 40~60                           | 217(59.61)          | 212(58.24)          |                      | 123(72.35)          | 122(71.76)          |                      |
| ≥60                             | 29(7.97)            | 36(9.89)            |                      | 22(12.94)           | 26(15.30)           |                      |
| Educational level               |                     |                     | 0.04                 |                     |                     | 0.75                 |
| primary school and less than    | 10(2.75)            | 23(6.32)            |                      | 30(17.65)           | 26(15.29)           |                      |
| junior middle and high school   | 147(40.38)          | 128(35.16)          |                      | 76(44.70)           | 74(43.53)           |                      |
| junior college or above         | 207(56.87)          | 213(58.52)          |                      | 64(37.65)           | 70(41.18)           |                      |
| Occupational status             |                     |                     | 0.39                 |                     |                     | 0.43                 |
| mental labour                   | 108(29.67)          | 104(28.57)          |                      | 50(29.41)           | 48(28.24)           |                      |
| physical labor                  | 86(23.63)           | 102(28.02)          |                      | 25(14.71)           | 34(20.00)           |                      |
| other                           | 170(46.70)          | 158(43.41)          |                      | 95(55.88)           | 88(51.76)           |                      |
| Income(yuan/month)              |                     |                     | 0.35                 |                     |                     | 0.85                 |
| <2000                           | 17(4.67)            | 17(4.67)            |                      | 15(8.82)            | 18(10.59)           |                      |
| 2000~3000                       | 87(23.90)           | 104(28.57)          |                      | 70(41.18)           | 70(41.18)           |                      |
| ≥3000                           | 260(71.43)          | 243(66.76)          |                      | 85(50.00)           | 82(48.23)           |                      |
| Marital status                  |                     |                     | 0.24                 |                     |                     | 0.52                 |
| single                          | 45(12.36)           | 56(15.38)           |                      | 4(2.35)             | 6(3.53)             |                      |
| married or other                | 319(87.64)          | 308(84.62)          |                      | 166(97.65)          | 164(96.47)          |                      |
| Smoking status                  |                     |                     | 0.30                 |                     |                     | 0.16                 |
| never smoker                    | 199(54.67)          | 213(58.52)          |                      | 168(98.82)          | 170(100)            |                      |
| smoker                          | 165(45.33)          | 151(41.48)          |                      | 2(1.18)             | 0(0.00)             |                      |
| Tea-drinking status             |                     |                     | 0.30                 |                     |                     | 0.01                 |
| yes                             | 258(70.88)          | 245(63.31)          |                      | 77(45.29)           | 55(32.35)           |                      |
| no                              | 106(29.12)          | 119(32.69)          |                      | 93(54.71)           | 115(67.55)          |                      |
| Physical activity               |                     |                     | 0.02                 |                     |                     | 0.88                 |
| light                           | 175(48.08)          | 137(37.64)          |                      | 19(11.18)           | 19(11.18)           |                      |
| moderate                        | 100(27.47)          | 121(33.24)          |                      | 47(27.64)           | 43(25.29)           |                      |
| severe                          | 89(24.45)           | 106(29.12)          |                      | 104(61.18)          | 108(63.53)          |                      |
| BMI(kg/m <sup>2</sup> )         |                     |                     | <0.001               |                     |                     | <0.001               |
| <18.5                           | 2(0.55)             | 11(3.02)            |                      | 1(0.59)             | 9(5.29)             |                      |
| 18.5~24.0                       | 107(29.40)          | 257(70.61)          |                      | 72(42.35)           | 125(73.53)          |                      |
| ≥24.0                           | 255(70.05)          | 96(26.37)           |                      | 97(57.06)           | 36(21.18)           |                      |
| History of diabetes             |                     |                     | 0.67                 |                     |                     | 0.18                 |
| yes                             | 12(3.30)            | 10(2.75)            |                      | 10(5.88)            | 5(2.94)             |                      |
| no                              | 352(96.70)          | 354(97.25)          |                      | 160(94.12)          | 165(94.06)          |                      |
| History of hypertension         |                     |                     | 0.85                 |                     |                     | 0.63                 |
| yes                             | 15(4.12)            | 16(4.40)            |                      | 8(4.71)             | 10(5.88)            |                      |
| no                              | 349(95.88)          | 348(95.60)          |                      | 162(95.29)          | 160(94.12)          |                      |
| History of hyperlipidemia       |                     |                     | 0.01                 |                     |                     | <0.001               |
| yes                             | 108(29.67)          | 77(21.15)           |                      | 51(30.00)           | 21(12.35)           |                      |
| no                              | 256(70.33)          | 287(78.85)          |                      | 119(70.00)          | 149(87.65)          |                      |
| MUFA intake,g/d <sup>b</sup>    | 34.10(28.49, 31.39) | 26.55(26.55, 36.79) | <0.001               | 29.99(26.37, 36.37) | 28.05(22.40, 31.39) | <0.001               |
| PUFA intake,g/d <sup>b</sup>    | 26.25(24.04, 23.90) | 22.01(22.01, 26.02) | <0.001               | 24.52(22.11, 27.12) | 21.21(18.83, 24.53) | <0.001               |
| Energy intake,kJ/d <sup>c</sup> | 10395.64±24989.07   | 97±2348.76          | 0.01                 | 7509.73±1650.71     | 7323.78±1852.97     | 0.04                 |

<sup>a</sup>P-values were calculated by using the Chi-square test for categorical variables and Wilcoxon rank sum test and ANOVA test for continues variables.

<sup>b</sup>Medians (IQRs).

For peer review only - <http://bmjopen.bmj.com/site/about/guidelines.xhtml>

<sup>c</sup>Mean(s.d).

### The associations of dietary nut intake with NAFLD

The participants' nut consumption is summarized in Table 2. Among the women, those in the NAFLD group consumed a significantly higher amount of nuts (6.80 g/d vs. 2.50 g/d;  $P = 0.02$ ) than those in the control group. No statistically significant differences were found between the cases and controls in the the sample or among the male participants. In order to adjust for potential confounding factors, quartile distributions of dietary nut consumption among the controls were used to categorize the nut intake of all the participants; the results are shown in Table 3. After adjusting for potential confounders, nut consumption was not associated with NAFLD risk among the participants in the sample. When the fully adjusted model was stratified by sex, a significant inverse association was found between nut consumption and NAFLD, but only among the men in the highest quartile (OR = 0.45; 95% CI: 0.27–0.76;  $P_{\text{trend}} = 0.01$ ).

Table 2 Comparison of nut daily intake between the case and the control

| Nut intake<br>(g/d) | Case   |           | Control |           | <i>P</i> -value <sup>a</sup> | <i>P</i> -value <sup>b</sup> |
|---------------------|--------|-----------|---------|-----------|------------------------------|------------------------------|
|                     | Median | Quartile  | Median  | Quartile  |                              |                              |
| Total population    | 3.15   | 1.46-8.80 | 2.86    | 1.22-8.98 | 0.35                         | 0.18                         |
| Men                 | 2.68   | 1.15-8.43 | 2.86    | 1.22-8.98 | 0.36                         | 0.94                         |
| Women               | 6.80   | 1.75-8.86 | 2.50    | 1.07-7.84 | 0.01                         | 0.02                         |

<sup>a</sup>*P*-values:calculated by using Wilcoxon rank sum test;before adjusting for energy.

<sup>b</sup>*P*-values :calculated by using Wilcoxon rank sum test; after adjusting for energy by using the residuals methods.

Table 3 Odds ratios (OR) and 95% confidence intervals (CI) for NAFLD in relation to nut intake

| Nut intake                    | Case<br><i>n</i> | Control<br><i>n</i> | Crude OR(95%CI) | Model 1 <sup>a</sup><br>OR(95%CI) | Model 2 <sup>a</sup><br>OR(95%CI) |
|-------------------------------|------------------|---------------------|-----------------|-----------------------------------|-----------------------------------|
| Total population <sup>b</sup> | 534              | 534                 |                 |                                   |                                   |
| Q1                            | 125              | 133                 | 1               | 1                                 | 1                                 |
| Q2                            | 112              | 134                 | 1.30(0.93-1.81) | 0.89(0.63-1.26)                   | 0.98(0.65-1.47)                   |
| Q3                            | 159              | 134                 | 1.77(1.29-2.44) | 1.26(0.90-1.77)                   | 1.16(0.78-1.72)                   |
| Q4                            | 138              | 133                 | 1.17(0.81-1.68) | 1.10(0.78-1.55)                   | 0.85(0.57-1.27)                   |
| <i>P</i> for trend*           |                  |                     | 0.46            | 0.45                              | 0.07                              |
| Men                           | 364              | 364                 |                 |                                   |                                   |
| Q1                            | 106              | 102                 | 1               | 1                                 | 1                                 |
| Q2                            | 91               | 79                  | 1.31(0.88-1.94) | 0.90(0.60-1.35)                   | 0.92(0.56-1.49)                   |
| Q3                            | 74               | 123                 | 1.81(1.24-2.65) | 1.73(1.16-2.57)                   | 1.36(0.85-2.18)                   |
| Q4                            | 93               | 60                  | 1.04(0.66-1.63) | 0.67(0.44-1.02)                   | 0.45(0.27-0.76)                   |
| <i>P</i> for trend*           |                  |                     | 0.81            | 0.04                              | 0.01                              |
| Women                         | 170              | 170                 |                 |                                   |                                   |
| Q1                            | 23               | 27                  | 1               | 1                                 | 1                                 |
| Q2                            | 33               | 43                  | 1.28(0.69-2.37) | 0.90(0.44-1.85)                   | 0.86(0.37-2.02)                   |
| Q3                            | 36               | 60                  | 1.71(0.95-3.08) | 0.70(0.35-1.41)                   | 0.56(0.25-1.28)                   |
| Q4                            | 78               | 40                  | 1.41(0.76-2.64) | 2.29(1.17-4.49)                   | 1.34(0.59-3.04)                   |
| <i>P</i> for trend*           |                  |                     | 0.36            | <0.001                            | 0.12                              |

<sup>a</sup>Model 1: Adjusted for total energy intake.

<sup>a</sup>Model 2: Adjusted further for age, income, smoking status, educational level, teaing status, occupationanl status, marital status, body mass index, physical activity, the history of diabetes, hypertension and hyperlipidemia, MUFA and PUFA intake.

<sup>b</sup>: further adiusted for sex.

\**P* for trend: Trend across intake levels with the categorical median.

For total population: Q1, <1.46 g/d; Q2, 1.46-3.15 g/d; Q3, 3.15-8.80 g/d; Q4, ≥8.80 g/d

For men: Q1, <1.15 g/d; Q2, 1.15-2.68 g/d; Q3, 2.68-8.43 g/d; Q4, ≥8.43g/d

For women: Q1, <1.75 g/d; Q2, 1.75-6.80 g/d; Q3, 6.80-8.86 g/d; Q4, ≥8.86 g/d.

### Stratified Analyses

In the stratified analysis, the inverse association between total-nut consumption and NAFLD risk was consistent across strata of age, sex, BMI, educational level, income, physical activity, smoking, tea drinking, and history of diabetes, hypertension, and hyperlipidemia. In addition to the association between nut consumption and NAFLD in men, we also found the highest nut-consumption category was associated

1  
2  
3 with a lower risk of developing NAFLD than the reference (OR = 0.53; 95% CI:  
4 0.31–0.93) among the participants who engaged in light and moderate physical  
5 activity. No significant interactions of total nut consumption and the potentially  
6 confounding effects of NAFLD risk factors were identified (Figure 1).  
7  
8  
9  
10

## 11 **Discussion**

12  
13  
14 In this case-control study, we found a significant inverse relationship between  
15 high nut consumption and NAFLD risk among the males, but found either no or  
16 unclear associations among the females and the overall sample. Moreover, the  
17 associations seemed to be independent of other predictors, including diet and lifestyle  
18 factors. The effect of nut consumption remained among men after controlling for  
19 other known or suspected risk factors for developing NAFLD. Furthermore, no  
20 significant interactions between nut consumption and the potential modifying effects  
21 of NAFLD risk factors were identified. To the best of our knowledge, this was the  
22 first study to assess the association between nut consumption and the risk of NAFLD  
23 in a Chinese sample.  
24  
25  
26  
27  
28  
29  
30  
31  
32  
33  
34  
35  
36

37 Our results are consistent with a previous study conducted in Korea, which found  
38 that a low intake of nuts and seeds (OR = 3.66;  $P_{\text{trend}} = 0.007$ ) was associated with a  
39 significantly higher risk of developing NAFLD among male participants, but not  
40 among females<sup>23</sup>. Although another case-control study found an association between  
41 a high intake of nuts with a lower likelihood of NAFLD, after adjusting for the  
42 confounders age, sex, waist circumference, and the values of the homeostasis model  
43 assessment of insulin resistance (OR = 0.61; 95% CI: 0.38–0.98), the association  
44 disappeared after further adjustment for adiponectin and TNF- $\alpha$  (OR = 0.72; 95% CI:  
45 0.41–1.25)<sup>18</sup>. However, the study did not examine nut intake separately; therefore,  
46 the results cannot be directly compared with those of our study. Although the results  
47  
48  
49  
50  
51  
52  
53  
54  
55  
56  
57  
58  
59  
60

1  
2  
3 of our study suggest nuts may play a protective role in the development of NAFLD in  
4  
5 males, a significant association between nut intake and the risk of NAFLD was not  
6  
7 found in females. NAFLD has been regarded as the “hepatic manifestation of MetS”;  
8  
9 therefore, our findings are indirectly supported by several studies showing an inverse  
10  
11 correlation between high nut intake and the risk of T2D and cardiovascular disease,  
12  
13 which share common metabolic parameters with NAFLD <sup>24-26</sup>. Nevertheless, the  
14  
15 relationship between nut intake and NAFLD warrants further exploration, and  
16  
17 additional studies are needed to examine gender differences in the association  
18  
19 between nut consumption and NAFLD, and its’ possible mechanisms should be  
20  
21 explored.  
22  
23  
24  
25

26  
27 Several biological pathways have been proposed to explain the association  
28  
29 between nut intake and NAFLD risk. Ellagic acid, a natural antioxidant polyphenol  
30  
31 found in nuts, can suppress oxidative stress and inflammation <sup>27</sup> and improve hepatic  
32  
33 insulin sensitivity and lipid metabolism <sup>28</sup>. Vitamin E and selenium in almonds and  
34  
35 walnuts, as well as folic acid and resveratrol in pine nuts, have been reported to have  
36  
37 beneficial effects on NAFLD. Numerous trials testing the therapeutic value of vitamin  
38  
39 E in NAFLD prevention found that Vitamin E significantly improved liver function  
40  
41 and histologic changes by significantly reducing aspartate aminotransferase, alanine  
42  
43 aminotransferase, steatosis, and inflammation in patients with NAFLD/non-alcoholic  
44  
45 steatohepatitis (NASH) <sup>29</sup>. Selenium is an antioxidant agent, and selenium deficiency  
46  
47 is associated with insulin resistance in patients with chronic liver disease <sup>30</sup>. Folate  
48  
49 plays an essential role in lipid metabolism and folic acid supplementation can  
50  
51 attenuate steatosis and improve oxidative stress in rodent models of NAFLD. Folate  
52  
53 can also blunt the increase of inflammatory cytokines secreted by immune cells <sup>31</sup>.  
54  
55 Resveratrol has antioxidant, anti-apoptotic, and anti-inflammatory properties in  
56  
57  
58  
59  
60

1  
2  
3 NAFLD patients <sup>32</sup>. Nuts, which are known to be rich in unsaturated fatty acids, are  
4 especially rich in n-3 PUFAs, a source of alpha-linolenic acid, which lowers LDL  
5 cholesterol <sup>33</sup>, and has been found to have beneficial effects on NAFLD <sup>34</sup>. Each type  
6 of nut has many nutrients and phytochemicals that may be beneficial to health, and it  
7 is likely that unknown salubrious effects of nuts may be related to NAFLD prevention.  
8 Moreover, many studies have shown a beneficial association between high nut intake  
9 and decreased risk of obesity <sup>35</sup>, T2D <sup>36</sup>, and MetS <sup>37</sup>, which are risk factors for  
10 NAFLD.  
11  
12

13  
14  
15 Our study has both strengths and limitations. The first strength is the large sample  
16 size, which may have reduced type II errors. Second, the collection of data using  
17 face-to-face interviews and a semi-quantitative food frequency questionnaire, which  
18 elicited extensive information on anthropometrics and lifestyle factors, allowed us to  
19 adjust for confounding factors. Finally, the study had sufficient power to investigate  
20 interactions between nut intake and other risk factors, for which a biologically  
21 plausible mechanism may exist. Nonetheless, several limitations should be considered  
22 when interpreting the study's findings. First, although we accounted for a wide range  
23 of socioeconomic characteristics and lifestyle factors, we cannot exclude the effects of  
24 unknown or poorly measured confounding variables or residual confounding  
25 attributable to other dietary/lifestyle factors, which might have influenced the  
26 observed associations. However, the associations persisted even after controlling for  
27 known and suspected predictors of NAFLD. Second, the intake of nuts was assessed  
28 by asking about using one question; therefore, we could not investigate the effects of  
29 different types of nuts, such as peanuts and walnuts, which contain different amounts  
30 of energy, fat content, and other nutrients<sup>38</sup>. Third, categorization of the intake of nuts  
31 in quartiles may lead to bias and inefficiency. Fourth, we did not consider  
32  
33  
34  
35  
36  
37  
38  
39  
40  
41  
42  
43  
44  
45  
46  
47  
48  
49  
50  
51  
52  
53  
54  
55  
56  
57  
58  
59  
60



1  
2  
3 manufacturing methods (e.g., raw, roasted, or boiled) or extra ingredients (e.g., sugar,  
4 salt, seasoning). Different preparation methods before and after roasting, the amount  
5 of time roasted, and the temperature used can affect the nutrient composition and  
6 ingredients in the nuts<sup>39 40</sup>. What's more, the item 'nuts' in the FFQ used in this study  
7 cannot represent all nuts, because it only included peanuts, walnuts, seeds. For this  
8 reason, direct comparisons with the results of other studies may be difficult. Fifth,  
9 because we used a case-control study design, recall bias is an inherent limitation.  
10 People who are health-conscious may over-report or under-report some food items.  
11 However, the protective effect of nuts on NAFLD was not generally known at the  
12 time of the survey, and thus, should be unrelated to recall bias. In addition, the  
13 stratified analyses was not corrected for multiple testing, which may inflate the risk  
14 for type I error. Finally, due to the small number of participants in the highest  
15 nut-intake category, we cannot rule out the possibility that some of our results are due  
16 to chance. However, the associations were consistent in the analyses stratified by  
17 some of the other factors, which reduces the likelihood of chance findings. In these  
18 stratified analyses, the statistical power needed to detect differences was limited by  
19 the sample size, and such analyses should be considered exploratory.

20  
21  
22  
23  
24  
25  
26  
27  
28  
29  
30  
31  
32  
33  
34  
35  
36  
37  
38  
39  
40  
41  
42 Our study had a retrospective design, which is lower on the evidence hierarchy than  
43 prospective studies. Nevertheless, case-control studies can provide evidence  
44 supporting the general relationship between diet and NAFLD, as there currently are  
45 no available prospective studies.

46  
47  
48  
49  
50  
51 In conclusion, this case-control study indicated that high nut intake was associated  
52 with a significantly reduced risk of NAFLD among Han men in China. However, no  
53 relationship was found between total nut intake and NAFLD risk among the Han  
54 women. Our data contribute to the growing evidence showing that a relatively simple  
55  
56  
57  
58  
59  
60

1  
2  
3 prevention strategy of incorporating a modest amount of nuts in the diet may  
4  
5 contribute to maintaining good health at both the individual and population levels.  
6  
7  
8  
9  
10  
11  
12  
13  
14  
15  
16  
17  
18  
19  
20  
21  
22  
23  
24  
25  
26  
27  
28  
29  
30  
31  
32  
33  
34  
35  
36  
37  
38  
39  
40  
41  
42  
43  
44  
45  
46  
47  
48  
49  
50  
51  
52  
53  
54  
55  
56  
57  
58  
59  
60

For peer review only

## Acknowledgements

We thank all study participants for their cooperation. We also thank our staff for recruiting participants and for their technical assistance.

## Contributors

BBC and YH are joint first authors. XEP obtained funding. XEP, XL and SHX designed the study. XTP, JHY, YFL and WJL collected the data. BBC and YH were involved in data cleaning and verification. BBC and XTP analyzed the data. BBC and YH drafted the manuscript. XEP, YFL and JHY contributed to the interpretation of the results and critical revision of the manuscript for important intellectual content and approved the final version of the manuscript. All authors have read and approved the final manuscript.

## Data sharing

No additional data are available.

## Conflict of Interest

The authors declare that they have no conflict of interest.

## Funding

This work was supported by the National Natural Science Foundation of China [grant number 81473047], the Training Program Foundation for Middle-aged and Young Talents from the Sanitation System of Fujian Province [grant number 2014-ZQN-ZD-23], and the Joint Innovation Project of Science and Technology of Fujian Province [grant number 2017Y9104].

## References

1. Maurice J, Manousou P. Non-alcoholic fatty liver disease. *Clin Med (Lond)* 2018;**18**(3):245-50. doi: 10.7861/clinmedicine.18-3-245
2. Rietman A, Sluik D, Feskens E, *et al.* Associations between dietary factors and markers of NAFLD in a general Dutch adult population. *Eur J Clin Nutr* 2018;**72**(1):117-23. doi: 10.1038/ejcn.2017.148
3. Fan J. Epidemiology of alcoholic and nonalcoholic fatty liver disease in China. *J Gastroenterol Hepatol* 2013;**28** Suppl 1:11-17. doi: 10.1111/jgh.12036
4. Katsagoni C, Georgoulis M, Papatheodoridis G, *et al.* Effects of lifestyle interventions on clinical characteristics of patients with non-alcoholic fatty liver disease: A meta-analysis. *Metab Clin Exp* 2017;**68**:119-32. doi: 10.1016/j.metabol.2016.12.006
5. Zelber-Sagi S, Salomone F, Mlynarsky L. The Mediterranean dietary pattern as the diet of choice for non-alcoholic fatty liver disease: Evidence and plausible mechanisms. *Liver Int* 2017;**37**(7):936-49. doi: 10.1111/liv.13435
6. Kosmidou M, Milionis H. Diabetes mellitus and non-alcoholic fatty liver disease: the thread of Ariadne. *Minerva Endocrinol* 2017;**42**(2):109-21. doi: 10.23736/S0391-1977.16.02562-1
7. Petrović G, Bjelaković G, Benedeto-Stojanov D, *et al.* Obesity and metabolic syndrome as risk factors for the development of non-alcoholic fatty liver disease as diagnosed by ultrasound. *Vojnosanit Pregl* 2016;**73**(10):910-20. doi: 10.2298/vsp150514093p

- 1  
2  
3  
4 8. Ros E. Health benefits of nut consumption. *Nutrients* 2010;**2(7)**:652-82. doi:  
5  
6 10.3390/nu2070652  
7  
8  
9 9. Lee J, Shin A, Oh JH, *et al.* The relationship between nut intake and risk of  
10  
11 colorectal cancer: a case control study. *Nutr J* 2018;**17(1)**:37. doi:  
12  
13 10.1186/s12937-018-0345-y  
14  
15  
16 10. Lahong J, Dongmei Y, Xiaoli X. Status and variation trend of nut intake among  
17  
18 Chinese residents,2010-2012. *Chin J Public Health* 2017;**33(6)**:916-18.  
19  
20  
21 11. Larsson S, Drea N, Björck M, *et al.* Nut consumption and incidence of seven  
22  
23 cardiovascular diseases. *Heart* 2018 doi: 10.1136/heartjnl-2017-312819  
24  
25  
26 12. Asghari G, Ghorbani Z, Mirmiran P, *et al.* Nut consumption is associated with  
27  
28 lower incidence of type 2 diabetes: The Tehran Lipid and Glucose Study.  
29  
30  
31 *Diabetes Metab* 2017;**43(1)**:18-24. doi: 10.1016/j.diabet.2016.09.008  
32  
33  
34 13. O'Neil C, Fulgoni V, Nicklas T. Tree Nut consumption is associated with better  
35  
36 adiposity measures and cardiovascular and metabolic syndrome health risk  
37  
38 factors in U.S. Adults: NHANES 2005-2010. *Nutr J* 2015;**14**:64. doi:  
39  
40  
41 10.1186/s12937-015-0052-x  
42  
43  
44 14. Casas-Agustench P, López-Uriarte P, Bulló M, *et al.* Effects of one serving of  
45  
46 mixed nuts on serum lipids, insulin resistance and inflammatory markers in  
47  
48 patients with the metabolic syndrome. *Nutr Metab Cardiovasc Dis*  
49  
50  
51 2011;**21(2)**:126-35. doi: 10.1016/j.numecd.2009.08.005  
52  
53  
54 15. Hernández-Alonso P, Salas-Salvadó J, Baldrich-Mora M, *et al.* Beneficial effect  
55  
56 of pistachio consumption on glucose metabolism, insulin resistance,  
57  
58  
59  
60

- 1  
2  
3  
4 inflammation, and related metabolic risk markers: a randomized clinical trial.  
5  
6 *Diabetes Care* 2014;**37(11)**:3098-105. doi: 10.2337/dc14-1431  
7  
8
- 9 16. Grosso G, Yang J, Marventano S, *et al.* Nut consumption on all-cause,  
10  
11 cardiovascular, and cancer mortality risk: a systematic review and  
12  
13 meta-analysis of epidemiologic studies. *Am J Clin Nutr* 2015;**101(4)**:783-93.  
14  
15  
16 doi: 10.3945/ajcn.114.099515  
17  
18
- 19 17. Dreher M, Maher C, Kearney P. The traditional and emerging role of nuts in  
20  
21 healthful diets. *Nutr Rev* 1996;**54(8)**:241-45.  
22  
23
- 24 18. Katsagoni C, Georgoulis M, Papatheodoridis G, *et al.* Associations Between  
25  
26 Lifestyle Characteristics and the Presence of Nonalcoholic Fatty Liver  
27  
28 Disease: A Case-Control Study. *Metab Syndr Relat Disord* 2017;**15(2)**:72-79.  
29  
30  
31 doi: 10.1089/met.2016.0105  
32  
33
- 34 19. Ke L, Toshiro T, Fengyan S, *et al.* Relative validity of a semi-quantitative food  
35  
36 frequency questionnaire versus 3 day weighed diet records in middle-aged  
37  
38 inhabitants in Chaoshan area, China. *Asian Pac J Cancer Prev*  
39  
40  
41 2005;**6(3)**:376-81. [published Online First: 2005/10/21]  
42  
43  
44
- 45 20. T F, S Z, D N, *et al.* Nut Consumption and Survival in Patients With Stage III  
46  
47 Colon Cancer: Results From CALGB 89803 (Alliance). *Journal of clinical*  
48  
49 *oncology : official journal of the American Society of Clinical Oncology*  
50  
51  
52 2018;**36(11)**:1112-20. doi: 10.1200/JCO.2017.75.5413  
53  
54
- 55 21. MA F, K S, D N, *et al.* Sugar-sweetened beverage intake and cancer recurrence  
56  
57  
58 and survival in CALGB 89803 (Alliance). *PloS one* 2014;**9(6)**:e99816. doi:  
59  
60

- 1  
2  
3  
4 10.1371/journal.pone.0099816  
5  
6  
7 22. JA M, K S, D N, *et al.* Dietary glycemic load and cancer recurrence and survival  
8  
9 in patients with stage III colon cancer: findings from CALGB 89803. *Journal*  
10  
11 *of the National Cancer Institute* 2012;**104(22)**:1702-11. doi:  
12  
13 10.1093/jnci/djs399  
14  
15  
16  
17 23. Han JM, Jo AN, Lee SM, *et al.* Associations between intakes of individual  
18  
19 nutrients or whole food groups and non-alcoholic fatty liver disease among  
20  
21 Korean adults. *Journal of Gastroenterology and Hepatology*  
22  
23 2014;**29(6)**:1265-72. doi: 10.1111/jgh.12520  
24  
25  
26  
27 24. Edens M, Kuipers F, Stolk R. Non-alcoholic fatty liver disease is associated with  
28  
29 cardiovascular disease risk markers. *Obes Rev* 2009;**10(4)**:412-19. doi:  
30  
31 10.1111/j.1467-789X.2009.00594.x  
32  
33  
34  
35 25. Lonardo A, Ballestri S, Guaraldi G, *et al.* Fatty liver is associated with an  
36  
37 increased risk of diabetes and cardiovascular disease - Evidence from three  
38  
39 different disease models: NAFLD, HCV and HIV. *World J Gastroenterol*  
40  
41 2016;**22(44)**:9674-93. doi: 10.3748/wjg.v22.i44.9674  
42  
43  
44  
45 26. Gastaldelli A. Insulin resistance and reduced metabolic flexibility: cause or  
46  
47 consequence of NAFLD? *Clin Sci* 2017;**131(22)**:2701-04. doi:  
48  
49 10.1042/CS20170987  
50  
51  
52  
53 27. Panchal SK, Ward L, Brown L. Ellagic acid attenuates high-carbohydrate, high-fat  
54  
55 diet-induced metabolic syndrome in rats. *Eur J Nutr* 2013;**52(2)**:559-68. doi:  
56  
57 10.1007/s00394-012-0358-9  
58  
59  
60

- 1  
2  
3  
4 28. Polce S, Burke C, França L, *et al.* Ellagic Acid Alleviates Hepatic Oxidative  
5  
6 Stress and Insulin Resistance in Diabetic Female Rats. *Nutrients*  
7  
8  
9 2018;**10(5)**:1-15. doi: 10.3390/nu10050531  
10  
11  
12 29. Sato K, Gosho M, Yamamoto T, *et al.* Vitamin E has a beneficial effect on  
13  
14 nonalcoholic fatty liver disease: a meta-analysis of randomized controlled  
15  
16 trials. *Nutrition* 2015;**31(7-8)**:923-30. doi: 10.1016/j.nut.2014.11.018  
17  
18  
19 30. Himoto T, Yoneyama H, Kurokohchi K, *et al.* Selenium deficiency is associated  
20  
21 with insulin resistance in patients with hepatitis C virus-related chronic liver  
22  
23 disease. *Nutr Res* 2011;**31(11)**:829-35. doi: 10.1016/j.nutres.2011.09.021  
24  
25  
26 31. Sid V, Siow Y, O K. Role of folate in nonalcoholic fatty liver disease. *Can J*  
27  
28 *Physiol Pharmacol* 2017;**95(10)**:1141-48. doi: 10.1139/cjpp-2016-0681  
29  
30  
31  
32 32. Hajjighasem A, Farzanegi P, Mazaheri Z. Effects of combined therapy with  
33  
34 resveratrol, continuous and interval exercises on apoptosis, oxidative stress,  
35  
36 and inflammatory biomarkers in the liver of old rats with non-alcoholic fatty  
37  
38 liver disease. *Arch Physiol Biochem* 2018:1-8. doi:  
39  
40 0.1080/13813455.2018.1441872  
41  
42  
43  
44 33. Jeznach-Steinhagen A, Ostrowska J, Czerwonogrodzka-Senczyna A, *et al.*  
45  
46 [Dietary recommendation for non-alcoholic fatty liver disease]. *Pol Merkur*  
47  
48 *Lekarski* 2017;**43(258)**:281-86.  
49  
50  
51  
52  
53 34. Musa-Veloso K, Venditti C, Lee H, *et al.* Systematic review and meta-analysis of  
54  
55 controlled intervention studies on the effectiveness of long-chain omega-3  
56  
57 fatty acids in patients with nonalcoholic fatty liver disease. *Nutr Rev*  
58  
59  
60



- 2018;**0(0)**:1-22. doi: 10.1093/nutrit/nuy022
35. Mohammadifard N, Yazdekhashti N, Stangl G, *et al.* Inverse association between the frequency of nut consumption and obesity among Iranian population: Isfahan Healthy Heart Program. *Eur J Nutr* 2015;**54(6)**:925-31. doi: 10.1007/s00394-014-0769-x
36. Hernández-Alonso P, Camacho-Barcia L, Bulló M, *et al.* Nuts and Dried Fruits: An Update of Their Beneficial Effects on Type 2 Diabetes. *Nutrients* 2017;**9(7)**:673. doi: 10.3390/nu9070673
37. Hosseinpour-Niazi S, Hosseini S, Mirmiran P, *et al.* Prospective Study of Nut Consumption and Incidence of Metabolic Syndrome: Tehran Lipid and Glucose Study. *Nutrients* 2017;**9(10)**:1056. doi: 10.3390/nu9101056
38. Wu L, Wang Z, Zhu J, *et al.* Nut consumption and risk of cancer and type 2 diabetes: a systematic review and meta-analysis. *Nutr Rev* 2015;**73(7)**:409-25. doi: 10.1093/nutrit/nuv006
39. Schlörmann W, Birringer M, Böhm V, *et al.* Influence of roasting conditions on health-related compounds in different nuts. *Food Chem* 2015;**180**:77-85. doi: 10.1016/j.foodchem.2015.02.017
40. Hosseini Bai S, Darby I, Nevenimo T, *et al.* Effects of roasting on kernel peroxide value, free fatty acid, fatty acid composition and crude protein content. *PLoS ONE* 2017;**12(9)**:e0184279. doi: 10.1371/journal.pone.0184279

### Figure legends

Figure 1. Odds ratios (OR) and 95% CIs for NAFLD across the strata of various factors.

The forest plot represents the ORs of the comparison of the lowest nut-intake category versus the highest nut-intake category, adjusting for age, income, smoking status, educational level, tea-drinking status, occupational status, marital status, BMI, physical activity, history of diabetes, hypertension and hyperlipidemia, total energy intake, and MUFA and PUFA intake.  $P$ -values are two-tailed;  $P_{\text{inter}}$  indicates  $P$  for the interaction between strata and nut intake;  $P_{\text{trend}}$  indicates  $P$  for the trend across levels of nut intake.

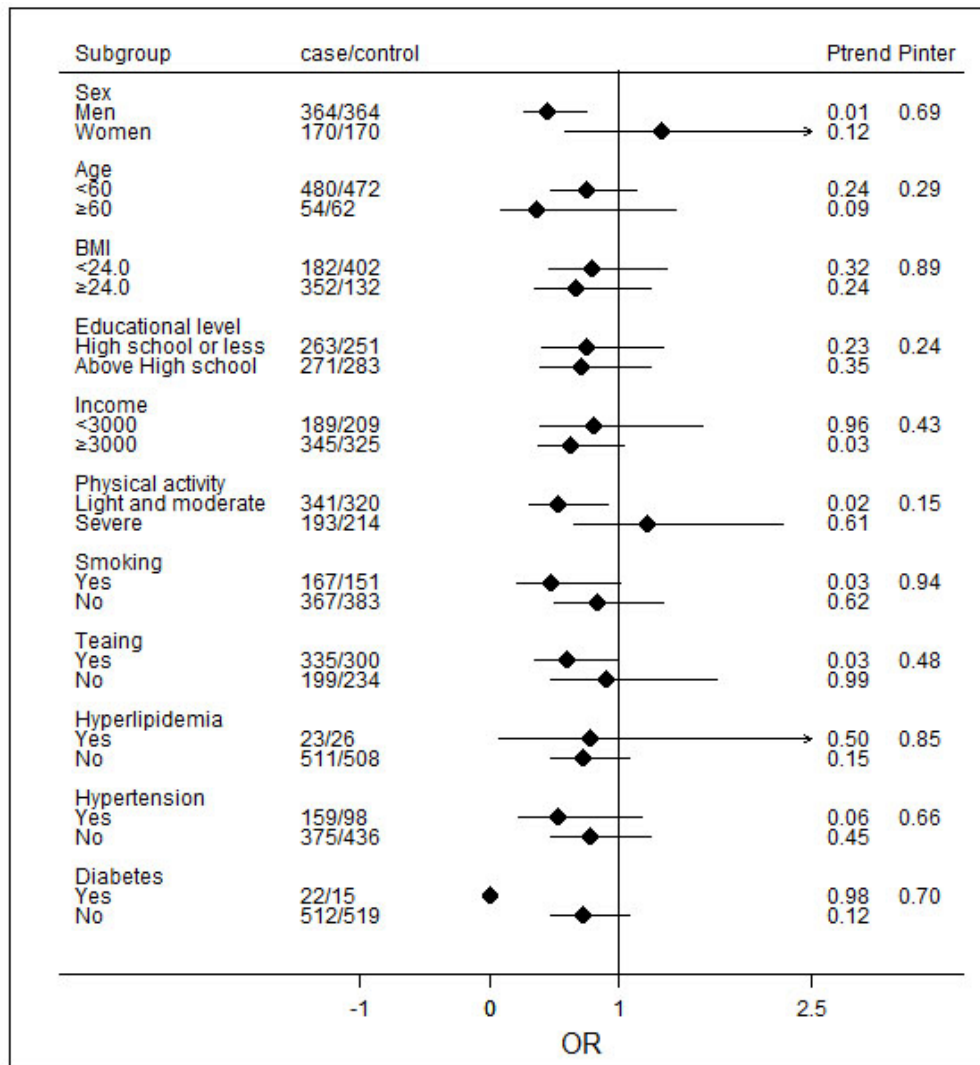

Figure 1. Odds ratios (OR) and 95% CIs for NAFLD across the strata of various factors. The forest plot represents the ORs of the comparison of the lowest nut-intake category versus the highest nut-intake category, adjusting for age, income, smoking status, educational level, tea-drinking status, occupational status, marital status, BMI, physical activity, history of diabetes, hypertension and hyperlipidemia, total energy intake, and MUFA and PUFA intake. P-values are two-tailed; Pinter indicates P for the interaction between strata and nut intake; Ptrend indicates P for the trend across levels of nut intake.

148x159mm (96 x 96 DPI)

**STROBE 2007 (v4) Statement—Checklist of items that should be included in reports of *case-control studies***

| Section/Topic                | Item # | Recommendation                                                                                                                                                                       | Reported on page # |
|------------------------------|--------|--------------------------------------------------------------------------------------------------------------------------------------------------------------------------------------|--------------------|
| Title and abstract           | 1      | (a) Indicate the study's design with a commonly used term in the title or the abstract                                                                                               | 1                  |
|                              |        | (b) Provide in the abstract an informative and balanced summary of what was done and what was found                                                                                  | 2                  |
| <b>Introduction</b>          |        |                                                                                                                                                                                      |                    |
| Background/rationale         | 2      | Explain the scientific background and rationale for the investigation being reported                                                                                                 | 3                  |
| Objectives                   | 3      | State specific objectives, including any prespecified hypotheses                                                                                                                     | 4                  |
| <b>Methods</b>               |        |                                                                                                                                                                                      |                    |
| Study design                 | 4      | Present key elements of study design early in the paper                                                                                                                              | 4                  |
| Setting                      | 5      | Describe the setting, locations, and relevant dates, including periods of recruitment, exposure, follow-up, and data collection                                                      | 4                  |
| Participants                 | 6      | (a) Give the eligibility criteria, and the sources and methods of case ascertainment and control selection. Give the rationale for the choice of cases and controls                  | 5                  |
|                              |        | (b) For matched studies, give matching criteria and the number of controls per case                                                                                                  | 5                  |
| Variables                    | 7      | Clearly define all outcomes, exposures, predictors, potential confounders, and effect modifiers. Give diagnostic criteria, if applicable                                             | 5-6                |
| Data sources/<br>measurement | 8*     | For each variable of interest, give sources of data and details of methods of assessment (measurement). Describe comparability of assessment methods if there is more than one group | 5-6                |
| Bias                         | 9      | Describe any efforts to address potential sources of bias                                                                                                                            | 7                  |

|                        |     |                                                                                                                                                                                                              |       |
|------------------------|-----|--------------------------------------------------------------------------------------------------------------------------------------------------------------------------------------------------------------|-------|
| Study size             | 10  | Explain how the study size was arrived at                                                                                                                                                                    | 5     |
| Quantitative variables | 11  | Explain how quantitative variables were handled in the analyses. If applicable, describe which groupings were chosen and why                                                                                 | 5-6   |
| Statistical methods    | 12  | (a) Describe all statistical methods, including those used to control for confounding                                                                                                                        | 6-7   |
|                        |     | (b) Describe any methods used to examine subgroups and interactions                                                                                                                                          | 7     |
|                        |     | (c) Explain how missing data were addressed                                                                                                                                                                  |       |
|                        |     | (d) If applicable, explain how matching of cases and controls was addressed                                                                                                                                  | 5     |
|                        |     | (e) Describe any sensitivity analyses                                                                                                                                                                        |       |
| <b>Results</b>         |     |                                                                                                                                                                                                              |       |
| Participants           | 13* | (a) Report numbers of individuals at each stage of study—eg numbers potentially eligible, examined for eligibility, confirmed eligible, included in the study, completing follow-up, and analysed            |       |
|                        |     | (b) Give reasons for non-participation at each stage                                                                                                                                                         |       |
|                        |     | (c) Consider use of a flow diagram                                                                                                                                                                           |       |
| Descriptive data       | 14* | (a) Give characteristics of study participants (eg demographic, clinical, social) and information on exposures and potential confounders                                                                     | 8-9   |
|                        |     | (b) Indicate number of participants with missing data for each variable of interest                                                                                                                          |       |
| Outcome data           | 15* | Report numbers in each exposure category, or summary measures of exposure                                                                                                                                    | 8-9   |
| Main results           | 16  | (a) Give unadjusted estimates and, if applicable, confounder-adjusted estimates and their precision (eg, 95% confidence interval). Make clear which confounders were adjusted for and why they were included | 9-10  |
|                        |     | (b) Report category boundaries when continuous variables were categorized                                                                                                                                    | 10-11 |

|                          |    |                                                                                                                                                                            |       |
|--------------------------|----|----------------------------------------------------------------------------------------------------------------------------------------------------------------------------|-------|
|                          |    | (c) If relevant, consider translating estimates of relative risk into absolute risk for a meaningful time period                                                           |       |
| Other analyses           | 17 | Report other analyses done—eg analyses of subgroups and interactions, and sensitivity analyses                                                                             | 11    |
| <b>Discussion</b>        |    |                                                                                                                                                                            |       |
| Key results              | 18 | Summarise key results with reference to study objectives                                                                                                                   | 12    |
| Limitations              | 19 | Discuss limitations of the study, taking into account sources of potential bias or imprecision.<br>Discuss both direction and magnitude of any potential bias              | 14    |
| Interpretation           | 20 | Give a cautious overall interpretation of results considering objectives, limitations, multiplicity of analyses, results from similar studies, and other relevant evidence | 12-14 |
| Generalisability         | 21 | Discuss the generalisability (external validity) of the study results                                                                                                      | 15    |
| <b>Other information</b> |    |                                                                                                                                                                            |       |
| Funding                  | 22 | Give the source of funding and the role of the funders for the present study and, if applicable, for the original study on which the present article is based              | 17    |

\*Give information separately for cases and controls in case-control studies and, if applicable, for exposed and unexposed groups in cohort and cross-sectional studies.

**Note:** An Explanation and Elaboration article discusses each checklist item and gives methodological background and published examples of transparent reporting. The STROBE checklist is best used in conjunction with this article (freely available on the Web sites of PLoS Medicine at <http://www.plosmedicine.org/>, Annals of Internal Medicine at <http://www.annals.org/>, and Epidemiology at <http://www.epidem.com/>). Information on the STROBE Initiative is available at [www.strobe-statement.org](http://www.strobe-statement.org).

# BMJ Open

## Association between nut intake and Non-alcoholic fatty liver disease risk: a retrospective case-control study in a sample of Chinese Han adults

|                                 |                                                                                                                                                                                                                                                                                                                                                                                                                                                                                                                                                                                                                                                                                                                                                                                                                                                                                                                                                                                                                                                                                                                                                                                                                                                                                    |
|---------------------------------|------------------------------------------------------------------------------------------------------------------------------------------------------------------------------------------------------------------------------------------------------------------------------------------------------------------------------------------------------------------------------------------------------------------------------------------------------------------------------------------------------------------------------------------------------------------------------------------------------------------------------------------------------------------------------------------------------------------------------------------------------------------------------------------------------------------------------------------------------------------------------------------------------------------------------------------------------------------------------------------------------------------------------------------------------------------------------------------------------------------------------------------------------------------------------------------------------------------------------------------------------------------------------------|
| Journal:                        | <i>BMJ Open</i>                                                                                                                                                                                                                                                                                                                                                                                                                                                                                                                                                                                                                                                                                                                                                                                                                                                                                                                                                                                                                                                                                                                                                                                                                                                                    |
| Manuscript ID                   | bmjopen-2019-028961.R2                                                                                                                                                                                                                                                                                                                                                                                                                                                                                                                                                                                                                                                                                                                                                                                                                                                                                                                                                                                                                                                                                                                                                                                                                                                             |
| Article Type:                   | Research                                                                                                                                                                                                                                                                                                                                                                                                                                                                                                                                                                                                                                                                                                                                                                                                                                                                                                                                                                                                                                                                                                                                                                                                                                                                           |
| Date Submitted by the Author:   | 25-Jun-2019                                                                                                                                                                                                                                                                                                                                                                                                                                                                                                                                                                                                                                                                                                                                                                                                                                                                                                                                                                                                                                                                                                                                                                                                                                                                        |
| Complete List of Authors:       | Chen, Bing bing; Fujian Medical University, Han, Ying; The First Affiliated Hospital of Fujian Medical University Pan, Xinting; Department of Epidemiology and Health Statistics, Fujian Provincial Key Laboratory of Environment Factors and Cancer, School of Public Health, Fujian Medical University<br>Yan, Jianhui; Department of Epidemiology and Health Statistics, Fujian Provincial Key Laboratory of Environment Factors and Cancer, School of Public Health, Fujian Medical University<br>Liu, Wenjuan; Department of Epidemiology and Health Statistics, Fujian Provincial Key Laboratory of Environment Factors and Cancer, School of Public Health, Fujian Medical University<br>li, yangfan; Department of Epidemiology and Health Statistics, Fujian Provincial Key Laboratory of Environment Factors and Cancer, School of Public Health, Fujian Medical University, Fujian, China, ;<br>lin, xu; Key Laboratory of Ministry of Education for Gastrointestinal Cancer, Fujian Medical University, Fujian, China<br>xu, shanghua; Department of Cardiology, Affiliated Nanping First Hospital, Fujian Medical University, Nanping, China<br>Peng, Xian-E; Key Laboratory of Ministry of Education for Gastrointestinal Cancer, Fujian Medical University, Fujian, |
| <b>Primary Subject Heading</b>: | Epidemiology                                                                                                                                                                                                                                                                                                                                                                                                                                                                                                                                                                                                                                                                                                                                                                                                                                                                                                                                                                                                                                                                                                                                                                                                                                                                       |
| Secondary Subject Heading:      | Nutrition and metabolism, Public health                                                                                                                                                                                                                                                                                                                                                                                                                                                                                                                                                                                                                                                                                                                                                                                                                                                                                                                                                                                                                                                                                                                                                                                                                                            |
| Keywords:                       | EPIDEMIOLOGY, NUTRITION & DIETETICS, Lipid disorders < DIABETES & ENDOCRINOLOGY                                                                                                                                                                                                                                                                                                                                                                                                                                                                                                                                                                                                                                                                                                                                                                                                                                                                                                                                                                                                                                                                                                                                                                                                    |
|                                 |                                                                                                                                                                                                                                                                                                                                                                                                                                                                                                                                                                                                                                                                                                                                                                                                                                                                                                                                                                                                                                                                                                                                                                                                                                                                                    |

SCHOLARONE™  
Manuscripts

1  
2  
3 **Association between nut intake and Non-alcoholic fatty liver disease risk: a**  
4 **retrospective case-control study in a sample of Chinese Han adults**  
5  
6

7 Bingbing Chen<sup>1#</sup>, Ying Han<sup>2#</sup>, Xinting Pan<sup>1</sup>, Jianhui Yan<sup>1</sup>, Wenjuan Liu<sup>1</sup>, Yangfan Li<sup>1</sup>, Xu Lin<sup>3</sup>,  
8 Shanghua Xu<sup>4</sup>, Xian-e Peng<sup>1,3\*</sup>  
9

10 <sup>1</sup> Department of Epidemiology and Health Statistics, Fujian Provincial Key  
11 Laboratory of Environment Factors and Cancer, School of Public Health, Fujian  
12 Medical University, Fujian, China;  
13  
14

15  
16  
17 <sup>2</sup> The First Affiliated Hospital of Fujian Medical University  
18

19 <sup>3</sup> Key Laboratory of Ministry of Education for Gastrointestinal Cancer, Fujian  
20 Medical University, Fujian, China;  
21  
22

23  
24 <sup>4</sup> Department of Cardiology, Affiliated Nanping First Hospital, Fujian Medical  
25 University, Nanping, China  
26  
27

28 <sup>#</sup> Both authors contributed equally to this work.  
29

30 <sup>\*</sup> Corresponding author. Xian-E Peng, Department of Epidemiology and Health  
31 Statistics, Fujian Provincial Key Laboratory of Environment Factors and Cancer,  
32 School of Public Health, Fujian Medical University, Fujian, China, 3501018  
33  
34  
35  
36  
37  
38  
39  
40  
41  
42  
43  
44  
45  
46  
47  
48  
49  
50  
51  
52  
53  
54  
55  
56  
57  
58  
59  
60  
Phone: +86-0591 22862648; E-mail: fmuxe@163.com

**Running title:** Nut intake and non-alcoholic fatty liver disease

**Word count:** 3055



## Abstract

**Objectives:** Nut consumption has been associated with a lower risk of type 2 diabetes, metabolic syndrome, and insulin resistance. However, its effect on the risk of non-alcoholic fatty liver disease (NAFLD) is unknown. Therefore, we investigated the relationship between nut consumption and NAFLD risk.

**Setting and participants:** We conducted a retrospective case-control study including 534 patients diagnosed with NAFLD and 534 controls matched by sex and age ( $\pm 5$ ) from the Affiliated Nanping First Hospital of Fujian Medical University in China.

**Main outcome measures:** Information on dietary intake was collected using a semi-quantitative food frequency questionnaires and nut consumption was calculated. Nut consumption was categorized using quartiles based on the distribution of daily nut intake of the controls. Binary logistic regression models were used to estimate odds ratio (ORs) and the 95% confidence intervals (CIs) for the association between nut consumption and NAFLD risk.

**Results:** After adjusting for potential confounding variables, nut consumption was not associated with NAFLD risk in the overall sample. When the fully adjusted model was stratified by sex, a significant inverse association was found between high nut consumption and NAFLD only among the men in the highest quartile (OR = 0.43; 95% CI: 0.26–0.71;  $P_{\text{trend}} = 0.01$ ). The inverse association of nut consumption with NAFLD risk in men remained significant after controlling for other known or suspected risk factors for NAFLD.

**Conclusions:** Diets with a higher intake of nuts may be associated with a decreased risk of NAFLD, particularly in men.

### Strengths and limitations of this study

1. In this study, several potential confounding variables such as energy intake and physical activity, were taken into account.

2. The study had tried to investigate interactions between nut intake and other risk factors, for which a biologically plausible mechanism may exist.

3. This study was a case-control design, thus the causal association between nut intake and NAFLD could not be precisely identified.

4. This study was a case-control study, recall bias was inevitable and randomized controlled trial studies are therefore required for more accurate results.

### Introduction

Non-alcoholic fatty liver disease (NAFLD) is defined as macrovesicular steatosis in  $\geq 5\%$  of hepatocytes, in the absence of a secondary cause, such as alcohol or drug use. NAFLD has become a leading cause of chronic liver disease, with a 25% prevalence worldwide<sup>1</sup>. Furthermore, a fatty liver is more prevalent in men compared with women<sup>2</sup>. The prevalence of NAFLD among the adults in China's general population is approximately 15% (6.3–27.0%), depending on the population studied<sup>3</sup>. Many studies suggest that diet and lifestyle may significantly influence the risk of NAFLD<sup>4,5</sup>. These studies indicate that type 2 diabetes (T2D)<sup>6</sup>, metabolic syndrome (MetS), obesity<sup>7</sup>, physical activity, and a high-fat diet<sup>4</sup> are associated with an increased risk for the development of NAFLD.

Nuts are nutrient-dense foods with complex matrices rich in unsaturated fatty and other bioactive compounds (e.g., high-quality vegetable protein, fiber, minerals, tocopherols, phytosterols, and phenolic compounds)<sup>8</sup>. The global intake of nuts has increased by 59% over the past decade<sup>9</sup>. China's per capita intake of nuts was 2.2 g/day in 1982, and increased to 3.8g/day in 2012<sup>10</sup>. Although they are high in fat and

1  
2  
3 energy dense, a high intake of nuts has been associated with several health benefits,  
4 including reduced risk of cardiovascular disease <sup>11</sup>, T2D <sup>12</sup>, MetS<sup>13</sup>, and insulin  
5 resistance<sup>14</sup> <sup>15</sup>.Moreover, nuts have antioxidative effects by decreasing lipid  
6 peroxidation and protecting against oxidative DNA damage <sup>16</sup>. Beneficial health  
7 effects have been attributed to the macronutrient and micronutrient profiles of nuts <sup>17</sup>.

14 NAFLD is regarded as the “hepatic manifestation of MetS.” Few studies have  
15 assessed the effects of nut intake on NAFLD, despite previous findings of an inverse  
16 correlation between high nut consumption and the risk of T2D and cardiovascular  
17 disease. In this study, we analyzed the association between nut intake and NAFLD  
18 risk and the interactions between nut intake and other established NAFLD risk factors  
19 in a large case-control study with a sample of Han adults in China.

## 28 **Methods**

### 31 **Patient and public involvement statement**

32 The study was approved by the local ethics committees of Fujian Medical University  
33 (ethics number 2014096). All subjects underwent abdominal ultrasound and blood  
34 biochemical tests. Once cases and controls have been linked to the NAFLD, a letter of  
35 invitation and information about the study will be sent to each potential case and  
36 control to obtain consent. All methods were performed in accordance with the  
37 relevant guidelines and regulations. The subjects were not involved in the design and  
38 planning of the study .They were not involved in the recruitment to and conduct of the  
39 study.

### 51 **Study design**

52 We conducted the retrospective case-control study in a health examination cent  
53 er at the Affiliated Nanping First Hospital of Fujian Medical University from  
54 April 2015 to August 2017. Data were obtained from subjects who underwent  
55  
56  
57  
58  
59  
60

1  
2  
3 routine health examination in the examination center. Patients newly diagnosed  
4 with NAFLD using abdominal ultrasonography in accordance with the “Guideli  
5 nes for the diagnosis and management of nonalcoholic fatty liver disease: update  
6 2010” were included in the study. Hepatic ultrasonography examination was pe  
7 rformed by trained ultrasonographers who were blinded to the clinical and labo  
8 ratory data. Hepatic steatosis was diagnosed by characteristic echo patterns acc  
9 ording to conventional criteria, such as the evidence of diffuse hyper-echogenic  
10 ity of the liver relative to the kidneys, ultrasound beam attenuation, and poor  
11 visualization of intrahepatic structures.  
12  
13  
14  
15  
16  
17  
18  
19  
20  
21  
22

### 23 **Sample size calculation**

24  
25 This study is a case-control design, thus we estimate the sample size based on the  
26 case-control study formula:  $n = 2\bar{p}\bar{q}(z_{\alpha} + z_{\beta})^2 / (p_1 - p_0)^2$ ,  $p_1 = \frac{p_0 RR}{1 + p_0(RR - 1)}$ ,  
27  
28  $\bar{p} = 0.5 \times (p_1 + p_0)$ ,  $\bar{q} = 1 - \bar{p}$ . By consulting the literature<sup>18</sup>, we estimate  $OR_{\text{nut intake}} =$   
29  
30  
31  
32  
33  
34  
35  
36  
37  
38  
39  
40  
41  
42  
43  
44  
45  
46  
47  
48  
49  
50  
51  
52  
53  
54  
55  
56  
57  
58  
59  
60  
0.72,  $p_0 = 0.50$ ,  $\alpha = 0.05$ ,  $\beta = 0.20$ , the calculated sample size was  $N_{\text{case}} = N_{\text{control}} = 609$ .  
Finally 1068 subjects (534 cases and 534 controls) were recruited in this study.

### 40 **Outcome--eligibility of NAFLD cases and controls**

41  
42 All participants were of Chinese Han ethnicity. The cases were newly diagnosed  
43 with NAFLD. The exclusion criteria were as follows: (a) daily alcohol intake of >40 g  
44 (men) and >20 g (women), (b) a history of other liver diseases including drug-induced  
45 liver disease, viral hepatitis, autoimmune hepatitis, total parenteral nutrition, and  
46 hepatolenticular degeneration, (c) taking hypolipidemic or weight reduction drugs, (d)  
47 age <18 or >70 years, (e) non-resident of Nanping, or (f) not of Han ethnicity. Adults  
48 who reported extremely abnormal levels of energy intake (2 511.60 kJ [600 kcal] or  
49  
50  
51  
52  
53  
54  
55  
56  
57  
58  
59  
60  
17 581.20 kJ [4 200 kcal] per day for men; 2 093 kJ [500 kcal] or 14,651.00 kJ [3500

1  
2  
3 kcal] per day for women), and those who did not answer 25 or more food-related  
4 items or questions about nut intake on the questionnaire, were excluded from the  
5 study.  
6  
7  
8  
9

10 The controls were randomly selected from the same center during the study period.  
11 Their eligibility criteria were identical to those of the cases, except for the  
12 requirement of a diagnosis of liver steatosis; they were frequency-matched with cases  
13 by age (within 5-yr intervals), gender, ethnicity, and region of origin.  
14  
15  
16  
17  
18

### 19 **Potential confounders--Data measurements and data collection**

20  
21 Trained interviewers performed a comprehensive medical history on each  
22 participant that included eliciting information about their demographic and  
23 socio-economic characteristics (e.g., age, gender, education, income, marriage status  
24 and history of diabetes, hypertension, hyperlipidemia and ), lifestyle habits (e.g.,  
25 smoking, drinking (alcohol), tea drinking, and physical activity), anthropometric  
26 assessment (e.g., height, body weight and blood pressure). The data were obtained  
27 from participants using structured questionnaires during face-to-face interviews.  
28  
29  
30  
31  
32  
33  
34  
35  
36

### 37 **Exposure-Nut consumption**

38  
39 Information about participants' typical food consumption was collected using a  
40 semi-quantitative food frequency questionnaire that included 110 food items, which  
41 was developed and validated in a sample from southern China <sup>19</sup>. Participants were  
42 asked to estimate the average frequency of consumption of selected foods using the  
43 following response options: rarely, <once/month, 1–3 times/month, 1–2 times/week,  
44 3–4 times/week, 5–6 times/week, once/day, twice/day, and >twice/day. Nut intake  
45 was defined as the consumption of “peanuts, walnuts, seeds, or other nuts.” Data from  
46 a semi-quantitative food frequency questionnaire were used to calculate daily nut and  
47 energy intake. Nut consumption was converted to grams/day by multiplying the  
48  
49  
50  
51  
52  
53  
54  
55  
56  
57  
58  
59  
60

1  
2  
3 food-intake frequency by fixed portion sizes. Nutrient intake, such as  
4 mono-unsaturated fatty acids (MUFAs) and poly-unsaturated fatty acids (PUFAs)  
5 were calculated by multiplying the intake frequency of each food by the nutrient  
6 content of the specified portion, and summing the products of all the food items.  
7  
8  
9  
10  
11

## 12 **Statistical analyses**

13  
14 Participants' characteristics were analyzed using Pearson's Chi-square test for  
15 categorical variables, and Wilcoxon's rank-sum test and ANOVA for continuous  
16 variables. Nut consumption was categorized by quartiles based on the distribution of  
17 daily nut intake by the controls (Q1-Q4). Binary logistic regression models were used  
18 to estimate the odds ratios (ORs) and their 95% confidence intervals (CIs) for the  
19 associations between nut consumption and NAFLD risk. To account for the energy  
20 content of the nut, our initial model adjusted for total energy intake by using the  
21 residuals method. The final model adjusted for potential confounders, including age,  
22 income, smoking status, educational level, and tea-drinking status, occupational status,  
23 marital status, body mass index (BMI), physical activity, and history of diabetes,  
24 hypertension, and hyperlipidemia. In order to reflect the matching protocol, when  
25 adjust for age, we entered a term for residual age into the regression analysis<sup>20</sup>. The  
26 final model also adjusted for MUFA and PUFA intake to control for their effects. The  
27 selection of covariates for the final model was based on clinical significance, results  
28 of previous studies. We tested for linear trends across categories of nut intake by  
29 assigning each participant the median value for each category and modeling this value  
30 as a continuous variable, consistent with prior studies<sup>21-23</sup>.  
31  
32  
33  
34  
35  
36  
37  
38  
39  
40  
41  
42  
43  
44  
45  
46  
47  
48  
49  
50  
51  
52  
53

54 We evaluated the influence of nut consumption across strata of other potential  
55 confounders, comparing participants in the highest nut-consumption category to the  
56 lowest nut-consumption category(reference). We also analyzed the interactions of nut  
57  
58  
59  
60

1  
2  
3 consumption with age, sex, BMI, smoking status, educational level, tea-drinking  
4 status, and other factors. We used the medians of the continuous variables to  
5  
6 categorize them and evaluate the interactions. The criteria for statistical significance  
7  
8 of the likelihood-ratio test of interaction effects was  $P < 0.05$ . Statistical analyses  
9  
10 were performed using SPSS version 22 (IBM, Armonk, NY, US). All P-values were  
11  
12  
13  
14  
15 2-tailed, and  $P < 0.05$  was considered statistically significant.

## 16 17 **Results**

### 18 19 **Baseline Characteristics**

20  
21 Table 1 presents health-related and demographic characteristics of the NAFLD  
22 cases and matched controls. Compared with the controls, the NAFLD cases tended to  
23  
24 have a higher BMI, higher total intake of energy, higher MUFA and PUFA  
25  
26 consumption, and a higher number of participants with a history of hyperlipidemia  
27  
28 among both men and women. Patients with NAFLD had a lower educational level and  
29  
30 the men engaged in less physical activity than the controls. No statistically significant  
31  
32 associations were found for age, occupational status, income, marital status, smoking  
33  
34 status, history of diabetes, or hypertension between the cases and the controls.  
35  
36  
37  
38  
39  
40  
41  
42  
43  
44  
45  
46  
47  
48  
49  
50  
51  
52  
53  
54  
55  
56  
57  
58  
59  
60

Table 1 General characteristics of cases and controls stratified by sex, n(%)

| Variables                        | Men (n=728)         |                     |                      | Women (n=340)       |                     |                      |
|----------------------------------|---------------------|---------------------|----------------------|---------------------|---------------------|----------------------|
|                                  | Cases               | Controls (n=364)    | P-value <sup>a</sup> | Cases (n=170)       | Controls (n=170)    | P-value <sup>a</sup> |
| Age                              |                     |                     | 0.66                 |                     |                     | 0.99                 |
| <40                              | 118(32.42)          | 116(31.87)          |                      | 25(14.71)           | 22(12.94)           |                      |
| 40~60                            | 217(59.61)          | 212(58.24)          |                      | 123(72.35)          | 122(71.76)          |                      |
| ≥60                              | 29(7.97)            | 36(9.89)            |                      | 22(12.94)           | 26(15.30)           |                      |
| Educational level                |                     |                     | 0.04                 |                     |                     | 0.75                 |
| primary school and less than     | 10(2.75)            | 23(6.32)            |                      | 30(17.65)           | 26(15.29)           |                      |
| junior middle and high school    | 147(40.38)          | 128(35.16)          |                      | 76(44.70)           | 74(43.53)           |                      |
| junior college or above          | 207(56.87)          | 213(58.52)          |                      | 64(37.65)           | 70(41.18)           |                      |
| Occupational status              |                     |                     | 0.39                 |                     |                     | 0.43                 |
| mental labour                    | 108(29.67)          | 104(28.57)          |                      | 50(29.41)           | 48(28.24)           |                      |
| physical labor                   | 86(23.63)           | 102(28.02)          |                      | 25(14.71)           | 34(20.00)           |                      |
| other                            | 170(46.70)          | 158(43.41)          |                      | 95(55.88)           | 88(51.76)           |                      |
| Income(yuan/month)               |                     |                     | 0.35                 |                     |                     | 0.85                 |
| <2000                            | 17(4.67)            | 17(4.67)            |                      | 15(8.82)            | 18(10.59)           |                      |
| 2000~3000                        | 87(23.90)           | 104(28.57)          |                      | 70(41.18)           | 70(41.18)           |                      |
| ≥3000                            | 260(71.43)          | 243(66.76)          |                      | 85(50.00)           | 82(48.23)           |                      |
| Marital status                   |                     |                     | 0.24                 |                     |                     | 0.52                 |
| single                           | 45(12.36)           | 56(15.38)           |                      | 4(2.35)             | 6(3.53)             |                      |
| married or other                 | 319(87.64)          | 308(84.62)          |                      | 166(97.65)          | 164(96.47)          |                      |
| Smoking status                   |                     |                     | 0.30                 |                     |                     | 0.16                 |
| never smoker                     | 199(54.67)          | 213(58.52)          |                      | 168(98.82)          | 170(100)            |                      |
| smoker                           | 165(45.33)          | 151(41.48)          |                      | 2(1.18)             | 0(0.00)             |                      |
| Tea-drinking status              |                     |                     | 0.30                 |                     |                     | 0.01                 |
| yes                              | 258(70.88)          | 245(63.31)          |                      | 77(45.29)           | 55(32.35)           |                      |
| no                               | 106(29.12)          | 119(32.69)          |                      | 93(54.71)           | 115(67.55)          |                      |
| Physical activity                |                     |                     | 0.02                 |                     |                     | 0.88                 |
| light                            | 175(48.08)          | 137(37.64)          |                      | 19(11.18)           | 19(11.18)           |                      |
| moderate                         | 100(27.47)          | 121(33.24)          |                      | 47(27.64)           | 43(25.29)           |                      |
| severe                           | 89(24.45)           | 106(29.12)          |                      | 104(61.18)          | 108(63.53)          |                      |
| BMI(kg/m <sup>2</sup> )          |                     |                     | <0.001               |                     |                     | <0.001               |
| <18.5                            | 2(0.55)             | 11(3.02)            |                      | 1(0.59)             | 9(5.29)             |                      |
| 18.5~24.0                        | 107(29.40)          | 257(70.61)          |                      | 72(42.35)           | 125(73.53)          |                      |
| ≥24.0                            | 255(70.05)          | 96(26.37)           |                      | 97(57.06)           | 36(21.18)           |                      |
| History of diabetes              |                     |                     | 0.67                 |                     |                     | 0.18                 |
| yes                              | 12(3.30)            | 10(2.75)            |                      | 10(5.88)            | 5(2.94)             |                      |
| no                               | 352(96.70)          | 354(97.25)          |                      | 160(94.12)          | 165(94.06)          |                      |
| History of hypertension          |                     |                     | 0.85                 |                     |                     | 0.63                 |
| yes                              | 15(4.12)            | 16(4.40)            |                      | 8(4.71)             | 10(5.88)            |                      |
| no                               | 349(95.88)          | 348(95.60)          |                      | 162(95.29)          | 160(94.12)          |                      |
| History of hyperlipidemia        |                     |                     | 0.01                 |                     |                     | <0.001               |
| yes                              | 108(29.67)          | 77(21.15)           |                      | 51(30.00)           | 21(12.35)           |                      |
| no                               | 256(70.33)          | 287(78.85)          |                      | 119(70.00)          | 149(87.65)          |                      |
| MUFA intake, g/d <sup>b</sup>    | 34.10(28.49, 31.39) | 26.55(26.55, 36.79) | <0.001               | 29.99(26.37, 36.37) | 28.05(22.40, 31.39) | <0.001               |
| PUFA intake, g/d <sup>b</sup>    | 26.25(24.04, 23.90) | 22.01(26.02)        | <0.001               | 24.52(22.11, 27.12) | 21.21(18.83, 24.53) | <0.001               |
| Energy intake, kJ/d <sup>c</sup> | 10395.64±24989.07   | 97±2348.76          | 0.01                 | 7509.73±1650.71     | 7323.78±1852.97     | 0.04                 |

<sup>a</sup>P-values were calculated by using the Chi-square test for categorical variables and Wilcoxon rank sum test and ANOVA test for continues variables.

<sup>b</sup>Medians (IQRs).

For peer review only - <http://bmjopen.bmj.com/site/about/guidelines.xhtml>

<sup>c</sup>Mean(s.d).



### The associations of dietary nut intake with NAFLD

The participants' nut consumption is summarized in Table 2. Among the women, those in the NAFLD group consumed a significantly higher amount of nuts (6.80 g/d vs. 2.50 g/d;  $P = 0.02$ ) than those in the control group. No statistically significant differences were found between the cases and controls in the the sample or among the male participants. In order to adjust for potential confounding factors, quartile distributions of dietary nut consumption among the controls were used to categorize the nut intake of all the participants; the results are shown in Table 3. After adjusting for potential confounders, nut consumption was not associated with NAFLD risk among the participants in the sample. When the fully adjusted model was stratified by sex, a significant inverse association was found between nut consumption and NAFLD, but only among the men in the highest quartile (OR = 0.43; 95% CI: 0.26–0.71;  $P_{\text{trend}} = 0.01$ ).

Table 2 Comparison of nut daily intake between the case and the control

| Nut intake<br>(g/d) | Case   |           | Control |           | <i>P</i> -value <sup>a</sup> | <i>P</i> -value <sup>b</sup> |
|---------------------|--------|-----------|---------|-----------|------------------------------|------------------------------|
|                     | Median | Quartile  | Median  | Quartile  |                              |                              |
| Total population    | 3.15   | 1.46-8.80 | 2.86    | 1.22-8.98 | 0.35                         | 0.18                         |
| Men                 | 2.68   | 1.15-8.43 | 2.86    | 1.22-8.98 | 0.36                         | 0.94                         |
| Women               | 6.80   | 1.75-8.86 | 2.50    | 1.07-7.84 | 0.01                         | 0.02                         |

<sup>a</sup>*P*-values:calculated by using Wilcoxon rank sum test;before adjusting for energy.

<sup>b</sup>*P*-values :calculated by using Wilcoxon rank sum test; after adjusting for energy by using the residuals methods.

Table 3 Odds ratios (OR) and 95% confidence intervals (CI) for NAFLD in relation to nut intake

| Nut intake                    | Case<br><i>n</i> | Control<br><i>n</i> | Crude OR(95%CI) | Model 1 <sup>a</sup><br>OR(95%CI) | Model 2 <sup>a</sup><br>OR(95%CI) |
|-------------------------------|------------------|---------------------|-----------------|-----------------------------------|-----------------------------------|
| Total population <sup>b</sup> | 534              | 534                 |                 |                                   |                                   |
| Q1                            | 125              | 133                 | 1               | 1                                 | 1                                 |
| Q2                            | 112              | 134                 | 1.30(0.93-1.81) | 0.89(0.63-1.26)                   | 0.85(0.56-1.29)                   |
| Q3                            | 159              | 134                 | 1.77(1.29-2.44) | 1.26(0.90-1.77)                   | 1.01(0.68-1.50)                   |
| Q4                            | 138              | 133                 | 1.17(0.81-1.68) | 1.10(0.78-1.55)                   | 0.67(0.44-1.02)                   |
| <i>P</i> for trend*           |                  |                     | 0.46            | 0.45                              | 0.07                              |
| Men                           | 364              | 364                 |                 |                                   |                                   |
| Q1                            | 106              | 102                 | 1               | 1                                 | 1                                 |
| Q2                            | 91               | 79                  | 1.31(0.88-1.94) | 0.90(0.60-1.35)                   | 0.88(0.54-1.43)                   |
| Q3                            | 74               | 123                 | 1.81(1.24-2.65) | 1.73(1.16-2.57)                   | 1.34(0.84-2.16)                   |
| Q4                            | 93               | 60                  | 1.04(0.66-1.63) | 0.67(0.44-1.02)                   | 0.43(0.26-0.71)                   |
| <i>P</i> for trend*           |                  |                     | 0.81            | 0.04                              | 0.01                              |
| Women                         | 170              | 170                 |                 |                                   |                                   |
| Q1                            | 23               | 27                  | 1               | 1                                 | 1                                 |
| Q2                            | 33               | 43                  | 1.28(0.69-2.37) | 0.90(0.44-1.85)                   | 0.84(0.36-1.97)                   |
| Q3                            | 36               | 60                  | 1.71(0.95-3.08) | 0.70(0.35-1.41)                   | 0.55(0.24-1.25)                   |
| Q4                            | 78               | 40                  | 1.41(0.76-2.64) | 2.29(1.17-4.49)                   | 1.30(0.57-2.95)                   |
| <i>P</i> for trend*           |                  |                     | 0.36            | <0.001                            | 0.12                              |

<sup>a</sup>Model 1: Adjusted for total energy intake.

<sup>a</sup>Model 2: Adjusted further for age, income, smoking status, educational level, teaing status, occupationanl status, marital status, body mass index, physical activity, the history of diabetes, hypertension and hyperlipidemia, MUFA and PUFA intake.

<sup>b</sup>: further adiusted for sex.

\**P* for trend: Trend across intake levels with the categorical median.

For total population: Q1, <1.46 g/d; Q2, 1.46-3.15 g/d; Q3, 3.15-8.80 g/d; Q4, ≥8.80 g/d

For men: Q1, <1.15 g/d; Q2, 1.15-2.68 g/d; Q3, 2.68-8.43 g/d; Q4, ≥8.43g/d

For women: Q1, <1.75 g/d; Q2, 1.75-6.80 g/d; Q3, 6.80-8.86 g/d; Q4, ≥8.86 g/d.

### Stratified Analyses

In the stratified analysis, the inverse association between total-nut consumption and NAFLD risk was consistent across strata of age, sex, BMI, educational level, income, physical activity, smoking, tea drinking, and history of diabetes, hypertension, and hyperlipidemia. In addition to the association between nut consumption and

1  
2  
3 NAFLD in men, we also found the highest nut-consumption category was associated  
4 with a lower risk of developing NAFLD than the reference (OR = 0.53; 95% CI:  
5 0.31–0.93) among the participants who engaged in light and moderate physical  
6 activity. No significant interactions of total nut consumption and the potentially  
7 confounding effects of NAFLD risk factors were identified (Figure 1).  
8  
9  
10  
11  
12  
13

## 14 **Discussion**

15  
16  
17 In this case-control study, we found a significant inverse relationship between  
18 high nut consumption and NAFLD risk among the males, but found either no or  
19 unclear associations among the females and the overall sample. Moreover, the  
20 associations seemed to be independent of other predictors, including diet and lifestyle  
21 factors. The effect of nut consumption remained among men after controlling for  
22 other known or suspected risk factors for developing NAFLD. Furthermore, no  
23 significant interactions between nut consumption and the potential modifying effects  
24 of NAFLD risk factors were identified. To the best of our knowledge, this was the  
25 first study to assess the association between nut consumption and the risk of NAFLD  
26 in a Chinese sample.  
27  
28  
29  
30  
31  
32  
33  
34  
35  
36  
37  
38  
39

40 Our results are consistent with a previous study conducted in Korea, which found  
41 that a low intake of nuts and seeds (OR = 3.66;  $P_{\text{trend}} = 0.007$ ) was associated with a  
42 significantly higher risk of developing NAFLD among male participants, but not  
43 among females<sup>24</sup>. Although another case-control study found an association between  
44 a high intake of nuts with a lower likelihood of NAFLD, after adjusting for the  
45 confounders age, sex, waist circumference, and the values of the homeostasis model  
46 assessment of insulin resistance (OR = 0.61; 95% CI: 0.38–0.98), the association  
47 disappeared after further adjustment for adiponectin and TNF- $\alpha$  (OR = 0.72; 95% CI:  
48 0.41–1.25)<sup>18</sup>. However, the study did not examine nut intake separately; therefore,  
49  
50  
51  
52  
53  
54  
55  
56  
57  
58  
59  
60

1  
2  
3 the results cannot be directly compared with those of our study. Although the results  
4  
5 of our study suggest nuts may play a protective role in the development of NAFLD in  
6  
7 males, a significant association between nut intake and the risk of NAFLD was not  
8  
9 found in females. NAFLD has been regarded as the “hepatic manifestation of MetS”;  
10  
11 therefore, our findings are indirectly supported by several studies showing an inverse  
12  
13 correlation between high nut intake and the risk of T2D and cardiovascular disease,  
14  
15 which share common metabolic parameters with NAFLD <sup>25-27</sup>. Nevertheless, the  
16  
17 relationship between nut intake and NAFLD warrants further exploration, and  
18  
19 additional studies are needed to examine gender differences in the association  
20  
21 between nut consumption and NAFLD, and its’ possible mechanisms should be  
22  
23 explored.  
24  
25  
26  
27

28  
29 Several biological pathways have been proposed to explain the association  
30  
31 between nut intake and NAFLD risk. Ellagic acid, a natural antioxidant polyphenol  
32  
33 found in nuts, can suppress oxidative stress and inflammation <sup>28</sup> and improve hepatic  
34  
35 insulin sensitivity and lipid metabolism <sup>29</sup>. Vitamin E and selenium in almonds and  
36  
37 walnuts, as well as folic acid and resveratrol in pine nuts, have been reported to have  
38  
39 beneficial effects on NAFLD. Numerous trials testing the therapeutic value of vitamin  
40  
41 E in NAFLD prevention found that Vitamin E significantly improved liver function  
42  
43 and histologic changes by significantly reducing aspartate aminotransferase, alanine  
44  
45 aminotransferase, steatosis, and inflammation in patients with NAFLD/non-alcoholic  
46  
47 steatohepatitis (NASH) <sup>30</sup>. Selenium is an antioxidant agent, and selenium deficiency  
48  
49 is associated with insulin resistance in patients with chronic liver disease <sup>31</sup>. Folate  
50  
51 plays an essential role in lipid metabolism and folic acid supplementation can  
52  
53 attenuate steatosis and improve oxidative stress in rodent models of NAFLD. Folate  
54  
55 can also blunt the increase of inflammatory cytokines secreted by immune cells <sup>32</sup>.  
56  
57  
58  
59  
60

1  
2  
3 Resveratrol has antioxidant, anti-apoptotic, and anti-inflammatory properties in  
4 NAFLD patients<sup>33</sup>. Nuts, which are known to be rich in unsaturated fatty acids, are  
5 especially rich in n-3 PUFAs, a source of alpha-linolenic acid, which lowers LDL  
6 cholesterol<sup>34</sup>, and has been found to have beneficial effects on NAFLD<sup>35</sup>. Each type  
7 of nut has many nutrients and phytochemicals that may be beneficial to health, and it  
8 is likely that unknown salubrious effects of nuts may be related to NAFLD prevention.  
9  
10 Moreover, many studies have shown a beneficial association between high nut intake  
11 and decreased risk of obesity<sup>36</sup>, T2D<sup>37</sup>, and MetS<sup>38</sup>, which are risk factors for  
12 NAFLD.  
13  
14

15  
16  
17 Our study has both strengths and limitations. The first strength is the large sample  
18 size, which may have reduced type II errors. Second, the collection of data using  
19 face-to-face interviews and a semi-quantitative food frequency questionnaire, which  
20 elicited extensive information on anthropometrics and lifestyle factors, allowed us to  
21 adjust for confounding factors. Finally, the study tried to investigate interactions  
22 between nut intake and other risk factors, for which a biologically plausible  
23 mechanism may exist. Nonetheless, several limitations should be considered when  
24 interpreting the study's findings. First, although we accounted for a wide range of  
25 socioeconomic characteristics and lifestyle factors, we cannot exclude the effects of  
26 unknown or poorly measured confounding variables or residual confounding  
27 attributable to other dietary/lifestyle factors, which might have influenced the  
28 observed associations. However, the associations persisted even after controlling for  
29 known and suspected predictors of NAFLD. Second, the intake of nuts was assessed  
30 by asking about using one question; therefore, we could not investigate the effects of  
31 different types of nuts, such as peanuts and walnuts, which contain different amounts  
32 of energy, fat content, and other nutrients<sup>39</sup>. Third, categorization of the intake of nuts  
33  
34  
35  
36  
37  
38  
39  
40  
41  
42  
43  
44  
45  
46  
47  
48  
49  
50  
51  
52  
53  
54  
55  
56  
57  
58  
59  
60

1  
2  
3 in quartiles may lead to bias and inefficiency. Fourth, we did not consider  
4 manufacturing methods (e.g., raw, roasted, or boiled) or extra ingredients (e.g., sugar,  
5 salt, seasoning). Different preparation methods before and after roasting, the amount  
6 of time roasted, and the temperature used can affect the nutrient composition and  
7 ingredients in the nuts<sup>40 41</sup>. What's more, the item 'nuts' in the FFQ used in this study  
8 cannot represent all nuts, because it only included peanuts, walnuts, seeds. For this  
9 reason, direct comparisons with the results of other studies may be difficult. Fifth,  
10 because we used a case-control study design, recall bias is an inherent limitation.  
11 People who are health-conscious may over-report or under-report some food items.  
12 However, the protective effect of nuts on NAFLD was not generally known at the  
13 time of the survey, and thus, should be unrelated to recall bias. In addition, the  
14 stratified analyses was not corrected for multiple testing, which may inflate the risk  
15 for type I error. Sixth, NAFLD is a spectrum of disease ranging from essentially  
16 benign simple steatosis (fatty infiltration of the liver) to the more severe form  
17 non-alcoholic steatohepatitis (NASH- fat with inflammation and/or fibrosis), but we  
18 did not collect data about the severity of NAFLD, so we can't analysis the  
19 association between nuts intake with the the severity of NAFLD. Finally, due to the  
20 small number of participants in the highest nut-intake category, we cannot rule out the  
21 possibility that some of our results are due to chance. However, the associations were  
22 consistent in the analyses stratified by some of the other factors, which reduces the  
23 likelihood of chance findings. In these stratified analyses, the statistical power needed  
24 to detect differences was limited by the sample size, and such analyses should be  
25 considered exploratory.

26  
27  
28  
29  
30  
31  
32  
33  
34  
35  
36  
37  
38  
39  
40  
41  
42  
43  
44  
45  
46  
47  
48  
49  
50  
51  
52  
53  
54  
55  
56 Our study had a retrospective design, which is lower on the evidence hierarchy than  
57 prospective studies. Nevertheless, case-control studies can provide evidence  
58  
59  
60

1  
2  
3 supporting the general relationship between diet and NAFLD, as there currently are  
4  
5 no available prospective studies.  
6  
7

8 In conclusion, this case-control study indicated that high nut intake was associated  
9  
10 with a significantly reduced risk of NAFLD among Han men in China. However, no  
11  
12 relationship was found between total nut intake and NAFLD risk among the Han  
13  
14 women. Our data contribute to the growing evidence showing that a relatively simple  
15  
16 prevention strategy of incorporating a modest amount of nuts in the diet may  
17  
18 contribute to maintaining good health at both the individual and population levels.  
19  
20  
21  
22  
23  
24  
25  
26  
27  
28  
29  
30  
31  
32  
33  
34  
35  
36  
37  
38  
39  
40  
41  
42  
43  
44  
45  
46  
47  
48  
49  
50  
51  
52  
53  
54  
55  
56  
57  
58  
59  
60

## Acknowledgements

We thank all study participants for their cooperation. We also thank our staff for recruiting participants and for their technical assistance.

## Contributors

BBC and YH are joint first authors. XEP obtained funding. XEP, XL and SHX designed the study. XTP, JHY, YFL and WJL collected the data. BBC and YH were involved in data cleaning and verification. BBC and XTP analyzed the data. BBC and YH drafted the manuscript. XEP, YFL and JHY contributed to the interpretation of the results and critical revision of the manuscript for important intellectual content and approved the final version of the manuscript. All authors have read and approved the final manuscript.

## Data sharing

No additional data are available.

## Conflict of Interest

The authors declare that they have no conflict of interest.

## Funding

This work was supported by the National Natural Science Foundation of China [grant number 81473047], the Training Program Foundation for Middle-aged and Young Talents from the Sanitation System of Fujian Province [grant number 2014-ZQN-ZD-23], and the Joint Innovation Project of Science and Technology of Fujian Province [grant number 2017Y9104].



## References

1. Maurice J, Manousou P. Non-alcoholic fatty liver disease. *Clin Med (Lond)* 2018;**18(3)**:245-50. doi: 10.7861/clinmedicine.18-3-245
2. Rietman A, Sluik D, Feskens E, *et al.* Associations between dietary factors and markers of NAFLD in a general Dutch adult population. *Eur J Clin Nutr* 2018;**72(1)**:117-23. doi: 10.1038/ejcn.2017.148
3. Fan J. Epidemiology of alcoholic and nonalcoholic fatty liver disease in China. *J Gastroenterol Hepatol* 2013;**28 Suppl 1**:11-17. doi: 10.1111/jgh.12036
4. Katsagoni C, Georgoulis M, Papatheodoridis G, *et al.* Effects of lifestyle interventions on clinical characteristics of patients with non-alcoholic fatty liver disease: A meta-analysis. *Metab Clin Exp* 2017;**68**:119-32. doi: 10.1016/j.metabol.2016.12.006
5. Zelber-Sagi S, Salomone F, Mlynarsky L. The Mediterranean dietary pattern as the diet of choice for non-alcoholic fatty liver disease: Evidence and plausible mechanisms. *Liver Int* 2017;**37(7)**:936-49. doi: 10.1111/liv.13435
6. Kosmidou M, Milionis H. Diabetes mellitus and non-alcoholic fatty liver disease: the thread of Ariadne. *Minerva Endocrinol* 2017;**42(2)**:109-21. doi: 10.23736/S0391-1977.16.02562-1
7. Petrović G, Bjelaković G, Benedeto-Stojanov D, *et al.* Obesity and metabolic syndrome as risk factors for the development of non-alcoholic fatty liver disease as diagnosed by ultrasound. *Vojnosanit Pregl* 2016;**73(10)**:910-20. doi: 10.2298/vsp150514093p
8. Ros E. Health benefits of nut consumption. *Nutrients* 2010;**2(7)**:652-82. doi: 10.3390/nu2070652
9. Lee J, Shin A, Oh JH, *et al.* The relationship between nut intake and risk of colorectal cancer: a case control study. *Nutr J* 2018;**17(1)**:37. doi: 10.1186/s12937-018-0345-y
10. Lahong J, Dongmei Y, Xiaoli X. Status and variation trend of nut intake among Chinese residents,2010-2012. *Chin J Public Health* 2017;**33(6)**:916-18.

- 1  
2  
3  
4 11. Larsson S, Drca N, Björck M, *et al.* Nut consumption and incidence of seven  
5 cardiovascular diseases. *Heart* 2018 doi: 10.1136/heartjnl-2017-312819  
6
- 7  
8 12. Asghari G, Ghorbani Z, Mirmiran P, *et al.* Nut consumption is associated with  
9 lower incidence of type 2 diabetes: The Tehran Lipid and Glucose Study.  
10  
11 *Diabetes Metab* 2017;**43(1)**:18-24. doi: 10.1016/j.diabet.2016.09.008  
12
- 13  
14 13. O'Neil C, Fulgoni V, Nicklas T. Tree Nut consumption is associated with better  
15 adiposity measures and cardiovascular and metabolic syndrome health risk  
16 factors in U.S. Adults: NHANES 2005-2010. *Nutr J* 2015;**14**:64. doi:  
17  
18 10.1186/s12937-015-0052-x  
19
- 20  
21 14. Casas-Agustench P, López-Uriarte P, Bulló M, *et al.* Effects of one serving of  
22 mixed nuts on serum lipids, insulin resistance and inflammatory markers in  
23 patients with the metabolic syndrome. *Nutr Metab Cardiovasc Dis*  
24  
25 2011;**21(2)**:126-35. doi: 10.1016/j.numecd.2009.08.005  
26  
27
- 28  
29 15. Hernández-Alonso P, Salas-Salvadó J, Baldrich-Mora M, *et al.* Beneficial effect  
30 of pistachio consumption on glucose metabolism, insulin resistance,  
31 inflammation, and related metabolic risk markers: a randomized clinical trial.  
32  
33 *Diabetes Care* 2014;**37(11)**:3098-105. doi: 10.2337/dc14-1431  
34  
35
- 36  
37 16. Grosso G, Yang J, Marventano S, *et al.* Nut consumption on all-cause,  
38 cardiovascular, and cancer mortality risk: a systematic review and  
39 meta-analysis of epidemiologic studies. *Am J Clin Nutr* 2015;**101(4)**:783-93.  
40  
41 doi: 10.3945/ajcn.114.099515  
42  
43
- 44  
45 17. Dreher M, Maher C, Kearney P. The traditional and emerging role of nuts in  
46 healthful diets. *Nutr Rev* 1996;**54(8)**:241-45.  
47
- 48  
49 18. Katsagoni C, Georgoulis M, Papatheodoridis G, *et al.* Associations Between  
50 Lifestyle Characteristics and the Presence of Nonalcoholic Fatty Liver  
51 Disease: A Case-Control Study. *Metab Syndr Relat Disord* 2017;**15(2)**:72-79.  
52  
53 doi: 10.1089/met.2016.0105  
54  
55
- 56  
57 19. L K, T T, S F, *et al.* Relative validity of a semi-quantitative food frequency  
58 questionnaire versus 3 day weighed diet records in middle-aged inhabitants in  
59 Chaoshan area, China. *Asian Pacific journal of cancer prevention : APJCP*  
60

- 2005;**6(3)**:376-81.
20. MA M, NP J, S G. Case-control matching: effects, misconceptions, and recommendations. *European journal of epidemiology* 2018;**33(1)**:5-14. doi: 10.1007/s10654-017-0325-0
21. T F, S Z, D N, *et al.* Nut Consumption and Survival in Patients With Stage III Colon Cancer: Results From CALGB 89803 (Alliance). *Journal of clinical oncology : official journal of the American Society of Clinical Oncology* 2018;**36(11)**:1112-20. doi: 10.1200/JCO.2017.75.5413
22. MA F, K S, D N, *et al.* Sugar-sweetened beverage intake and cancer recurrence and survival in CALGB 89803 (Alliance). *PloS one* 2014;**9(6)**:e99816. doi: 10.1371/journal.pone.0099816
23. JA M, K S, D N, *et al.* Dietary glycemic load and cancer recurrence and survival in patients with stage III colon cancer: findings from CALGB 89803. *Journal of the National Cancer Institute* 2012;**104(22)**:1702-11. doi: 10.1093/jnci/djs399
24. Han JM, Jo AN, Lee SM, *et al.* Associations between intakes of individual nutrients or whole food groups and non-alcoholic fatty liver disease among Korean adults. *Journal of Gastroenterology and Hepatology* 2014;**29(6)**:1265-72. doi: 10.1111/jgh.12520
25. Edens M, Kuipers F, Stolk R. Non-alcoholic fatty liver disease is associated with cardiovascular disease risk markers. *Obes Rev* 2009;**10(4)**:412-19. doi: 10.1111/j.1467-789X.2009.00594.x
26. Lonardo A, Ballestri S, Guaraldi G, *et al.* Fatty liver is associated with an increased risk of diabetes and cardiovascular disease - Evidence from three different disease models: NAFLD, HCV and HIV. *World J Gastroenterol* 2016;**22(44)**:9674-93. doi: 10.3748/wjg.v22.i44.9674
27. Gastaldelli A. Insulin resistance and reduced metabolic flexibility: cause or consequence of NAFLD? *Clin Sci* 2017;**131(22)**:2701-04. doi: 10.1042/CS20170987
28. Panchal SK, Ward L, Brown L. Ellagic acid attenuates high-carbohydrate, high-fat

- 1  
2  
3 diet-induced metabolic syndrome in rats. *Eur J Nutr* 2013;**52(2)**:559-68. doi:  
4 10.1007/s00394-012-0358-9  
5  
6  
7  
8 29. Polce S, Burke C, França L, *et al.* Ellagic Acid Alleviates Hepatic Oxidative  
9 Stress and Insulin Resistance in Diabetic Female Rats. *Nutrients*  
10 2018;**10(5)**:1-15. doi: 10.3390/nu10050531  
11  
12  
13 30. Sato K, Gosho M, Yamamoto T, *et al.* Vitamin E has a beneficial effect on  
14 nonalcoholic fatty liver disease: a meta-analysis of randomized controlled  
15 trials. *Nutrition* 2015;**31(7-8)**:923-30. doi: 10.1016/j.nut.2014.11.018  
16  
17  
18 31. Himoto T, Yoneyama H, Kurokohchi K, *et al.* Selenium deficiency is associated  
19 with insulin resistance in patients with hepatitis C virus-related chronic liver  
20 disease. *Nutr Res* 2011;**31(11)**:829-35. doi: 10.1016/j.nutres.2011.09.021  
21  
22  
23 32. Sid V, Siow Y, O K. Role of folate in nonalcoholic fatty liver disease. *Can J*  
24 *Physiol Pharmacol* 2017;**95(10)**:1141-48. doi: 10.1139/cjpp-2016-0681  
25  
26  
27 33. Hajjighasem A, Farzanegi P, Mazaheri Z. Effects of combined therapy with  
28 resveratrol, continuous and interval exercises on apoptosis, oxidative stress,  
29 and inflammatory biomarkers in the liver of old rats with non-alcoholic fatty  
30 liver disease. *Arch Physiol Biochem* 2018:1-8. doi:  
31 0.1080/13813455.2018.1441872  
32  
33  
34 34. Jeznach-Steinhagen A, Ostrowska J, Czerwonogrodzka-Senczyzna A, *et al.*  
35 [Dietary recommendation for non-alcoholic fatty liver disease]. *Pol Merkur*  
36 *Lekarski* 2017;**43(258)**:281-86.  
37  
38  
39 35. Musa-Veloso K, Venditti C, Lee H, *et al.* Systematic review and meta-analysis of  
40 controlled intervention studies on the effectiveness of long-chain omega-3  
41 fatty acids in patients with nonalcoholic fatty liver disease. *Nutr Rev*  
42 2018;**0(0)**:1-22. doi: 10.1093/nutrit/nuy022  
43  
44  
45 36. Mohammadifard N, Yazdekhashti N, Stangl G, *et al.* Inverse association between  
46 the frequency of nut consumption and obesity among Iranian population:  
47 Isfahan Healthy Heart Program. *Eur J Nutr* 2015;**54(6)**:925-31. doi:  
48 10.1007/s00394-014-0769-x  
49  
50  
51 37. Hernández-Alonso P, Camacho-Barcia L, Bulló M, *et al.* Nuts and Dried Fruits:  
52  
53  
54  
55  
56  
57  
58  
59  
60

- 1  
2  
3  
4 An Update of Their Beneficial Effects on Type 2 Diabetes. *Nutrients*  
5 2017;**9(7)**:673. doi: 10.3390/nu9070673  
6  
7  
8 38. Hosseinpour-Niazi S, Hosseini S, Mirmiran P, *et al.* Prospective Study of Nut  
9 Consumption and Incidence of Metabolic Syndrome: Tehran Lipid and  
10 Glucose Study. *Nutrients* 2017;**9(10)**:1056. doi: 10.3390/nu9101056  
11  
12  
13 39. Wu L, Wang Z, Zhu J, *et al.* Nut consumption and risk of cancer and type 2  
14 diabetes: a systematic review and meta-analysis. *Nutr Rev* 2015;**73(7)**:409-25.  
15 doi: 10.1093/nutrit/nuv006  
16  
17  
18  
19 40. Schlörmann W, Birringer M, Böhm V, *et al.* Influence of roasting conditions on  
20 health-related compounds in different nuts. *Food Chem* 2015;**180**:77-85. doi:  
21 10.1016/j.foodchem.2015.02.017  
22  
23  
24  
25 41. Hosseini Bai S, Darby I, Nevenimo T, *et al.* Effects of roasting on kernel peroxide  
26 value, free fatty acid, fatty acid composition and crude protein content. *PLoS*  
27 *ONE* 2017;**12(9)**:e0184279. doi: 10.1371/journal.pone.0184279  
28  
29  
30  
31  
32  
33  
34  
35  
36  
37  
38  
39  
40  
41  
42  
43  
44  
45  
46  
47  
48  
49  
50  
51  
52  
53  
54  
55  
56  
57  
58  
59  
60

### Figure legends

Figure 1. Odds ratios (OR) and 95% CIs for NAFLD across the strata of various factors.

The forest plot represents the ORs of the comparison of the lowest nut-intake category versus the highest nut-intake category, adjusting for age, income, smoking status, educational level, tea-drinking status, occupational status, marital status, BMI, physical activity, history of diabetes, hypertension and hyperlipidemia, total energy intake, and MUFA and PUFA intake.  $P$ -values are two-tailed;  $P_{inter}$  indicates  $P$  for the interaction between strata and nut intake;  $P_{trend}$  indicates  $P$  for the trend across levels of nut intake.

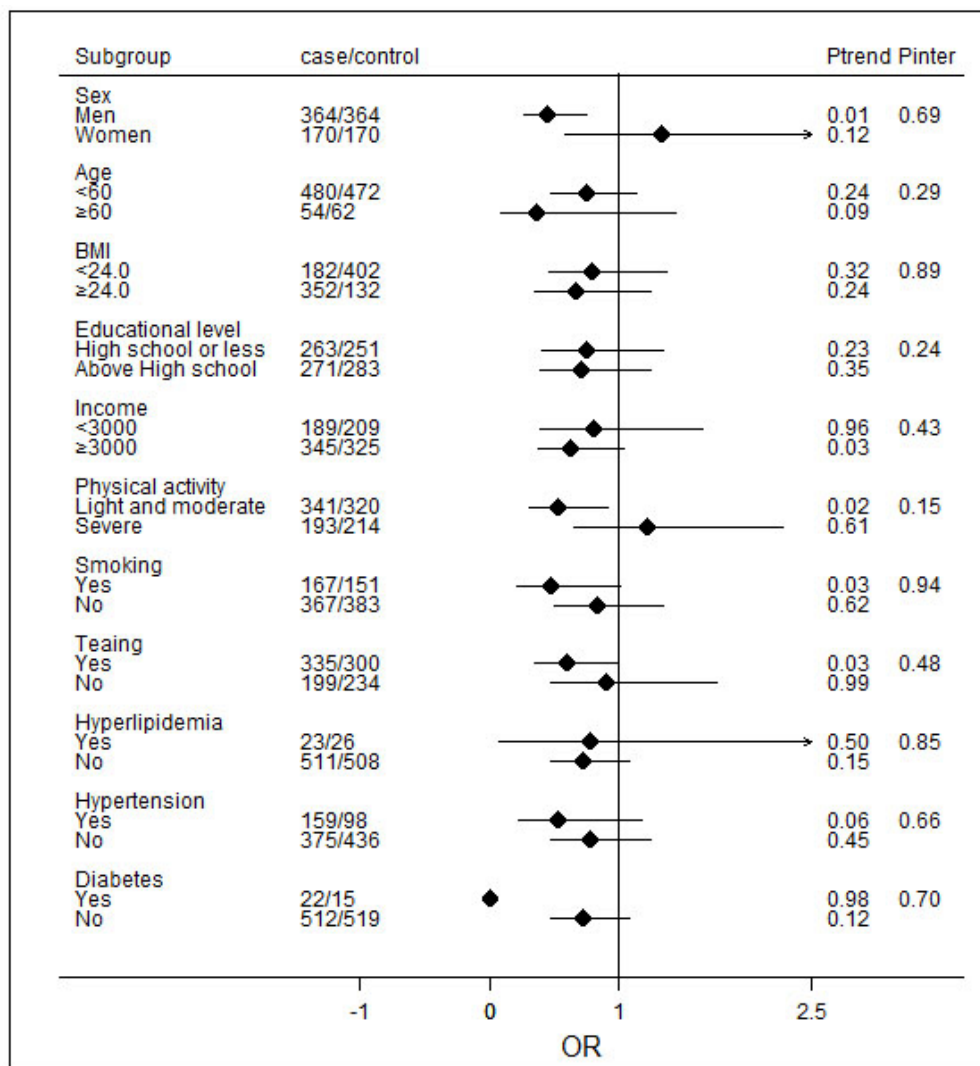

Figure 1. Odds ratios (OR) and 95% CIs for NAFLD across the strata of various factors. The forest plot represents the ORs of the comparison of the lowest nut-intake category versus the highest nut-intake category, adjusting for age, income, smoking status, educational level, tea-drinking status, occupational status, marital status, BMI, physical activity, history of diabetes, hypertension and hyperlipidemia, total energy intake, and MUFA and PUFA intake. P-values are two-tailed; Pinter indicates P for the interaction between strata and nut intake; Ptrend indicates P for the trend across levels of nut intake.

148x159mm (96 x 96 DPI)

**STROBE 2007 (v4) Statement—Checklist of items that should be included in reports of *case-control studies***

| Section/Topic             | Item # | Recommendation                                                                                                                                                                       | Reported on page # |
|---------------------------|--------|--------------------------------------------------------------------------------------------------------------------------------------------------------------------------------------|--------------------|
| Title and abstract        | 1      | (a) Indicate the study’s design with a commonly used term in the title or the abstract                                                                                               | 1                  |
|                           |        | (b) Provide in the abstract an informative and balanced summary of what was done and what was found                                                                                  | 2                  |
| <b>Introduction</b>       |        |                                                                                                                                                                                      |                    |
| Background/rationale      | 2      | Explain the scientific background and rationale for the investigation being reported                                                                                                 | 3                  |
| Objectives                | 3      | State specific objectives, including any prespecified hypotheses                                                                                                                     | 4                  |
| <b>Methods</b>            |        |                                                                                                                                                                                      |                    |
| Study design              | 4      | Present key elements of study design early in the paper                                                                                                                              | 4                  |
| Setting                   | 5      | Describe the setting, locations, and relevant dates, including periods of recruitment, exposure, follow-up, and data collection                                                      | 4                  |
| Participants              | 6      | (a) Give the eligibility criteria, and the sources and methods of case ascertainment and control selection. Give the rationale for the choice of cases and controls                  | 5                  |
|                           |        | (b) For matched studies, give matching criteria and the number of controls per case                                                                                                  | 5                  |
| Variables                 | 7      | Clearly define all outcomes, exposures, predictors, potential confounders, and effect modifiers. Give diagnostic criteria, if applicable                                             | 5-6                |
| Data sources/ measurement | 8*     | For each variable of interest, give sources of data and details of methods of assessment (measurement). Describe comparability of assessment methods if there is more than one group | 5-6                |
| Bias                      | 9      | Describe any efforts to address potential sources of bias                                                                                                                            | 7                  |

1  
2  
3  
4  
5  
6  
7  
8  
9  
10  
11  
12  
13  
14  
15  
16  
17  
18  
19  
20  
21  
22  
23  
24  
25  
26  
27  
28  
29  
30  
31  
32  
33  
34  
35  
36  
37  
38  
39  
40  
41  
42  
43  
44  
45  
46



|                        |     |                                                                                                                                                                                                              |       |
|------------------------|-----|--------------------------------------------------------------------------------------------------------------------------------------------------------------------------------------------------------------|-------|
| Study size             | 10  | Explain how the study size was arrived at                                                                                                                                                                    | 5     |
| Quantitative variables | 11  | Explain how quantitative variables were handled in the analyses. If applicable, describe which groupings were chosen and why                                                                                 | 5-6   |
| Statistical methods    | 12  | (a) Describe all statistical methods, including those used to control for confounding                                                                                                                        | 6-7   |
|                        |     | (b) Describe any methods used to examine subgroups and interactions                                                                                                                                          | 7     |
|                        |     | (c) Explain how missing data were addressed                                                                                                                                                                  |       |
|                        |     | (d) If applicable, explain how matching of cases and controls was addressed                                                                                                                                  | 5     |
|                        |     | (e) Describe any sensitivity analyses                                                                                                                                                                        |       |
| <b>Results</b>         |     |                                                                                                                                                                                                              |       |
| Participants           | 13* | (a) Report numbers of individuals at each stage of study—eg numbers potentially eligible, examined for eligibility, confirmed eligible, included in the study, completing follow-up, and analysed            |       |
|                        |     | (b) Give reasons for non-participation at each stage                                                                                                                                                         |       |
|                        |     | (c) Consider use of a flow diagram                                                                                                                                                                           |       |
| Descriptive data       | 14* | (a) Give characteristics of study participants (eg demographic, clinical, social) and information on exposures and potential confounders                                                                     | 8-9   |
|                        |     | (b) Indicate number of participants with missing data for each variable of interest                                                                                                                          |       |
| Outcome data           | 15* | Report numbers in each exposure category, or summary measures of exposure                                                                                                                                    | 8-9   |
| Main results           | 16  | (a) Give unadjusted estimates and, if applicable, confounder-adjusted estimates and their precision (eg, 95% confidence interval). Make clear which confounders were adjusted for and why they were included | 9-10  |
|                        |     | (b) Report category boundaries when continuous variables were categorized                                                                                                                                    | 10-11 |

|                          |    |                                                                                                                                                                            |       |
|--------------------------|----|----------------------------------------------------------------------------------------------------------------------------------------------------------------------------|-------|
|                          |    | (c) If relevant, consider translating estimates of relative risk into absolute risk for a meaningful time period                                                           |       |
| Other analyses           | 17 | Report other analyses done—eg analyses of subgroups and interactions, and sensitivity analyses                                                                             | 11    |
| <b>Discussion</b>        |    |                                                                                                                                                                            |       |
| Key results              | 18 | Summarise key results with reference to study objectives                                                                                                                   | 12    |
| Limitations              | 19 | Discuss limitations of the study, taking into account sources of potential bias or imprecision.<br>Discuss both direction and magnitude of any potential bias              | 14    |
| Interpretation           | 20 | Give a cautious overall interpretation of results considering objectives, limitations, multiplicity of analyses, results from similar studies, and other relevant evidence | 12-14 |
| Generalisability         | 21 | Discuss the generalisability (external validity) of the study results                                                                                                      | 15    |
| <b>Other information</b> |    |                                                                                                                                                                            |       |
| Funding                  | 22 | Give the source of funding and the role of the funders for the present study and, if applicable, for the original study on which the present article is based              | 17    |

\*Give information separately for cases and controls in case-control studies and, if applicable, for exposed and unexposed groups in cohort and cross-sectional studies.

**Note:** An Explanation and Elaboration article discusses each checklist item and gives methodological background and published examples of transparent reporting. The STROBE checklist is best used in conjunction with this article (freely available on the Web sites of PLoS Medicine at <http://www.plosmedicine.org/>, Annals of Internal Medicine at <http://www.annals.org/>, and Epidemiology at <http://www.epidem.com/>). Information on the STROBE Initiative is available at [www.strobe-statement.org](http://www.strobe-statement.org).

# BMJ Open

## Association between nut intake and Non-alcoholic fatty liver disease risk: a retrospective case-control study in a sample of Chinese Han adults

|                                 |                                                                                                                                                                                                                                                                                                                                                                                                                                                                                                                                                                                                                                                                                                                                                                                                                                                                                                                                                                                                                                                                                                                                                                                                                                                                                    |
|---------------------------------|------------------------------------------------------------------------------------------------------------------------------------------------------------------------------------------------------------------------------------------------------------------------------------------------------------------------------------------------------------------------------------------------------------------------------------------------------------------------------------------------------------------------------------------------------------------------------------------------------------------------------------------------------------------------------------------------------------------------------------------------------------------------------------------------------------------------------------------------------------------------------------------------------------------------------------------------------------------------------------------------------------------------------------------------------------------------------------------------------------------------------------------------------------------------------------------------------------------------------------------------------------------------------------|
| Journal:                        | <i>BMJ Open</i>                                                                                                                                                                                                                                                                                                                                                                                                                                                                                                                                                                                                                                                                                                                                                                                                                                                                                                                                                                                                                                                                                                                                                                                                                                                                    |
| Manuscript ID                   | bmjopen-2019-028961.R3                                                                                                                                                                                                                                                                                                                                                                                                                                                                                                                                                                                                                                                                                                                                                                                                                                                                                                                                                                                                                                                                                                                                                                                                                                                             |
| Article Type:                   | Research                                                                                                                                                                                                                                                                                                                                                                                                                                                                                                                                                                                                                                                                                                                                                                                                                                                                                                                                                                                                                                                                                                                                                                                                                                                                           |
| Date Submitted by the Author:   | 05-Aug-2019                                                                                                                                                                                                                                                                                                                                                                                                                                                                                                                                                                                                                                                                                                                                                                                                                                                                                                                                                                                                                                                                                                                                                                                                                                                                        |
| Complete List of Authors:       | Chen, Bing bing; Fujian Medical University, Han, Ying; The First Affiliated Hospital of Fujian Medical University Pan, Xinting; Department of Epidemiology and Health Statistics, Fujian Provincial Key Laboratory of Environment Factors and Cancer, School of Public Health, Fujian Medical University<br>Yan, Jianhui; Department of Epidemiology and Health Statistics, Fujian Provincial Key Laboratory of Environment Factors and Cancer, School of Public Health, Fujian Medical University<br>Liu, Wenjuan; Department of Epidemiology and Health Statistics, Fujian Provincial Key Laboratory of Environment Factors and Cancer, School of Public Health, Fujian Medical University<br>li, yangfan; Department of Epidemiology and Health Statistics, Fujian Provincial Key Laboratory of Environment Factors and Cancer, School of Public Health, Fujian Medical University, Fujian, China, ;<br>lin, xu; Key Laboratory of Ministry of Education for Gastrointestinal Cancer, Fujian Medical University, Fujian, China<br>xu, shanghua; Department of Cardiology, Affiliated Nanping First Hospital, Fujian Medical University, Nanping, China<br>Peng, Xian-E; Key Laboratory of Ministry of Education for Gastrointestinal Cancer, Fujian Medical University, Fujian, |
| <b>Primary Subject Heading</b>: | Epidemiology                                                                                                                                                                                                                                                                                                                                                                                                                                                                                                                                                                                                                                                                                                                                                                                                                                                                                                                                                                                                                                                                                                                                                                                                                                                                       |
| Secondary Subject Heading:      | Nutrition and metabolism, Public health                                                                                                                                                                                                                                                                                                                                                                                                                                                                                                                                                                                                                                                                                                                                                                                                                                                                                                                                                                                                                                                                                                                                                                                                                                            |
| Keywords:                       | EPIDEMIOLOGY, NUTRITION & DIETETICS, Lipid disorders < DIABETES & ENDOCRINOLOGY                                                                                                                                                                                                                                                                                                                                                                                                                                                                                                                                                                                                                                                                                                                                                                                                                                                                                                                                                                                                                                                                                                                                                                                                    |
|                                 |                                                                                                                                                                                                                                                                                                                                                                                                                                                                                                                                                                                                                                                                                                                                                                                                                                                                                                                                                                                                                                                                                                                                                                                                                                                                                    |

SCHOLARONE™  
Manuscripts

1  
2  
3  
4 **Association between nut intake and Non-alcoholic fatty liver disease risk: a**  
5 **retrospective case-control study in a sample of Chinese Han adults**  
6

7 Bingbing Chen<sup>1#</sup>, Ying Han<sup>2#</sup>, Xinting Pan<sup>1</sup>, Jianhui Yan<sup>1</sup>, Wenjuan Liu<sup>1</sup>, Yangfan Li<sup>1</sup>, Xu Lin<sup>3</sup>,  
8 Shanghua Xu<sup>4</sup>, Xian-e Peng<sup>1,3\*</sup>  
9

10 <sup>1</sup> Department of Epidemiology and Health Statistics, Fujian Provincial Key  
11 Laboratory of Environment Factors and Cancer, School of Public Health, Fujian  
12 Medical University, Fujian, China;  
13  
14

15  
16  
17 <sup>2</sup> The First Affiliated Hospital of Fujian Medical University  
18

19 <sup>3</sup> Key Laboratory of Ministry of Education for Gastrointestinal Cancer, Fujian  
20 Medical University, Fujian, China;  
21  
22

23  
24 <sup>4</sup> Department of Cardiology, Affiliated Nanping First Hospital, Fujian Medical  
25 University, Nanping, China  
26  
27

28 <sup>#</sup> Both authors contributed equally to this work.  
29

30 <sup>\*</sup> Corresponding author. Xian-E Peng, Department of Epidemiology and Health  
31 Statistics, Fujian Provincial Key Laboratory of Environment Factors and Cancer,  
32 School of Public Health, Fujian Medical University, Fujian, China, 3501018  
33  
34  
35  
36  
37  
38  
39  
40  
41  
42  
43  
44  
45  
46  
47  
48  
49  
50  
51  
52  
53  
54  
55  
56  
57  
58  
59  
60  
Phone: +86-0591 22862648; E-mail: [fmuxe@163.com](mailto:fmuxe@163.com)

**Running title:** Nut intake and non-alcoholic fatty liver disease

**Word count:** 3055

## Abstract

**Objectives:** Nut consumption has been associated with a lower risk of type 2 diabetes, metabolic syndrome, and insulin resistance. However, its effect on the risk of non-alcoholic fatty liver disease (NAFLD) is unknown. Therefore, we investigated the relationship between nut consumption and NAFLD risk.

**Setting and participants:** We conducted a retrospective case-control study including 534 patients diagnosed with NAFLD and 534 controls matched by sex and age ( $\pm 5$ ) from the Affiliated Nanping First Hospital of Fujian Medical University in China.

**Main outcome measures:** Information on dietary intake was collected using a semi-quantitative food frequency questionnaires and nut consumption was calculated. Nut consumption was categorized using quartiles based on the distribution of daily nut intake of the controls. Binary logistic regression models were used to estimate odds ratio (ORs) and the 95% confidence intervals (CIs) for the association between nut consumption and NAFLD risk.

**Results:** After adjusting for potential confounding variables, nut consumption was not associated with NAFLD risk in the overall sample. When the fully adjusted model was stratified by sex, a significant inverse association was found between high nut consumption and NAFLD only among the men in the highest quartile (OR = 0.43; 95% CI: 0.26–0.71;  $P_{\text{trend}} = 0.01$ ). The inverse association of nut consumption with NAFLD risk in men remained significant after controlling for other known or suspected risk factors for NAFLD.

**Conclusions:** Diets with a higher intake of nuts may be associated with a decreased risk of NAFLD, particularly in men.

### Strengths and limitations of this study

1. In this study, several potential confounding variables such as energy intake and physical activity, were taken into account.

2. The study had tried to investigate interactions between nut intake and other risk factors, for which a biologically plausible mechanism may exist.

3. This study was a case-control design, thus the causal association between nut intake and NAFLD could not be precisely identified.

4. This study was a case-control study, recall bias was inevitable and randomized controlled trial studies are therefore required for more accurate results.

### Introduction

Non-alcoholic fatty liver disease (NAFLD) is defined as macrovesicular steatosis in  $\geq 5\%$  of hepatocytes, in the absence of a secondary cause, such as alcohol or drug use. NAFLD has become a leading cause of chronic liver disease, with a 25% prevalence worldwide<sup>1</sup>. Furthermore, a fatty liver is more prevalent in men compared with women<sup>2</sup>. The prevalence of NAFLD among the adults in China's general population is approximately 15% (6.3–27.0%), depending on the population studied<sup>3</sup>. Many studies suggest that diet and lifestyle may significantly influence the risk of NAFLD<sup>4,5</sup>. These studies indicate that type 2 diabetes (T2D)<sup>6</sup>, metabolic syndrome (MetS), obesity<sup>7</sup>, physical activity, and a high-fat diet<sup>4</sup> are associated with an increased risk for the development of NAFLD.

Nuts are nutrient-dense foods with complex matrices rich in unsaturated fatty and other bioactive compounds (e.g., high-quality vegetable protein, fiber, minerals, tocopherols, phytosterols, and phenolic compounds)<sup>8</sup>. The global intake of nuts has increased by 59% over the past decade<sup>9</sup>. China's per capita intake of nuts was 2.2 g/day in 1982, and increased to 3.8g/day in 2012<sup>10</sup>. Although they are high in fat and

1  
2  
3 energy dense, a high intake of nuts has been associated with several health benefits,  
4 including reduced risk of cardiovascular disease <sup>11</sup>, T2D <sup>12</sup>, MetS<sup>13</sup>, and insulin  
5 resistance<sup>14</sup> <sup>15</sup>. Moreover, nuts have antioxidative effects by decreasing lipid  
6 peroxidation and protecting against oxidative DNA damage <sup>16</sup>. Beneficial health  
7 effects have been attributed to the macronutrient and micronutrient profiles of nuts <sup>17</sup>.

14 NAFLD is regarded as the “hepatic manifestation of MetS.” Few studies have  
15 assessed the effects of nut intake on NAFLD, despite previous findings of an inverse  
16 correlation between high nut consumption and the risk of T2D and cardiovascular  
17 disease. In this study, we analyzed the association between nut intake and NAFLD  
18 risk and the interactions between nut intake and other established NAFLD risk factors  
19 in a large case-control study with a sample of Han adults in China.

## 28 **Methods**

### 30 **Patient and public involvement statement**

31 Patients and public will not be involved in the development of the research question  
32 or in the design of the study. Subjects will receive oral and written information about  
33 this study, however, they will not be involved in the recruitment and conduct of the  
34 study. After signing an informed consent by the participants, they will be assessed for  
35 eligibility and data collection will begin. Eligible subjects will be interviewed  
36 face-to-face by investigators to collect data. In addition, all methods were performed  
37 in accordance with the relevant guidelines and regulations.

### 52 **Study design**

53 We conducted the retrospective case-control study in a health examination  
54 center at the Affiliated Nanping First Hospital of Fujian Medical University fro  
55 m April 2015 to August 2017. Data were obtained from subjects who underwe  
56  
57  
58  
59  
60

nt routine health examination in the examination center. Patients newly diagnosed with NAFLD using abdominal ultrasonography in accordance with the “Guidelines for the diagnosis and management of nonalcoholic fatty liver disease: update 2010” were included in the study. Hepatic ultrasonography examination was performed by trained ultrasonographers who were blinded to the clinical and laboratory data. Hepatic steatosis was diagnosed by characteristic echo patterns according to conventional criteria, such as the evidence of diffuse hyper-echogenicity of the liver relative to the kidneys, ultrasound beam attenuation, and poor visualization of intrahepatic structures.

### Sample size calculation

This study is a case-control design, thus we estimate the sample size based on the case-control study formula:  $n = 2\bar{p}\bar{q}(z_{\alpha} + z_{\beta})^2 / (p_1 - p_0)^2$ ,  $p_1 = \frac{p_0 RR}{1 + p_0(RR-1)}$ ,  $\bar{p} = 0.5 \times (p_1 + p_0)$ ,  $\bar{q} = 1 - \bar{p}$ . By consulting the literature<sup>18</sup>, we estimate  $OR_{\text{nut intake}} = 0.72$ ,  $p_0 = 0.50$ ,  $\alpha = 0.05$ ,  $\beta = 0.20$ , the calculated sample size was  $N_{\text{case}} = N_{\text{control}} = 609$ . Finally 1068 subjects (534 cases and 534 controls) were recruited in this study.

### Outcome--eligibility of NAFLD cases and controls

All participants were of Chinese Han ethnicity. The cases were newly diagnosed with NAFLD. The exclusion criteria were as follows: (a) daily alcohol intake of >40 g (men) and >20 g (women), (b) a history of other liver diseases including drug-induced liver disease, viral hepatitis, autoimmune hepatitis, total parenteral nutrition, and hepatocellular degeneration, (c) taking hypolipidemic or weight reduction drugs, (d) age <18 or >70 years, (e) non-resident of Nanping, or (f) not of Han ethnicity. Adults who reported extremely abnormal levels of energy intake (2 511.60 kJ [600 kcal] or 17 581.20 kJ [4 200 kcal] per day for men; 2 093 kJ [500 kcal] or 14,651.00 kJ [3500



1  
2  
3 kcal] per day for women), and those who did not answer 25 or more food-related  
4 items or questions about nut intake on the questionnaire, were excluded from the  
5 study.  
6  
7  
8  
9

10 The controls were randomly selected from the same center during the study period.  
11 Their eligibility criteria were identical to those of the cases, except for the  
12 requirement of a diagnosis of liver steatosis; they were frequency-matched with cases  
13 by age (within 5-yr intervals), gender, ethnicity, and region of origin.  
14  
15  
16  
17  
18

### 19 **Ethical considerations**

20  
21 All subjects who participated in this study provided written informed  
22 consent and the study was approved by the local ethics committees of  
23 Fujian Medical University (ethics number 2014096). In addition, all methods  
24 were performed in accordance with the relevant guidelines and  
25 regulations of the University.  
26  
27  
28  
29  
30  
31  
32  
33  
34  
35  
36  
37  
38  
39

### 40 **Potential confounders--Data measurements and data collection**

41 Trained interviewers performed a comprehensive medical history on each  
42 participant that included eliciting information about their demographic and  
43 socio-economic characteristics (e.g., age, gender, education, income, marriage status  
44 and history of diabetes, hypertension, hyperlipidemiaand ), lifestyle habits (e.g.,  
45 smoking, drinking (alcohol), tea drinking, and physical activity), anthropometric  
46 assessment (e.g., height, body weight and blood pressure). The data were obtained  
47 from participants using structured questionnaires during face-to-face interviews.  
48  
49  
50  
51  
52  
53  
54  
55  
56  
57

### 58 **Exposure-Nut consumption**

1  
2  
3 Information about participants' typical food consumption was collected using a  
4 semi-quantitative food frequency questionnaire that included 110 food items, which  
5 was developed and validated in a sample from southern China <sup>19</sup>. Participants were  
6 asked to estimate the average frequency of consumption of selected foods using the  
7 following response options: rarely, <once/month, 1–3 times/month, 1–2 times/week,  
8 3–4 times/week, 5–6 times/week, once/day, twice/day, and >twice/day. Nut intake  
9 was defined as the consumption of “peanuts, walnuts, seeds, or other nuts.” Data from  
10 a semi-quantitative food frequency questionnaire were used to calculate daily nut and  
11 energy intake. Nut consumption was converted to grams/day by multiplying the  
12 food-intake frequency by fixed portion sizes. Nutrient intake, such as  
13 mono-unsaturated fatty acids (MUFAs) and poly-unsaturated fatty acids (PUFAs)  
14 were calculated by multiplying the intake frequency of each food by the nutrient  
15 content of the specified portion, and summing the products of all the food items.  
16  
17  
18  
19  
20  
21  
22  
23  
24  
25  
26  
27  
28  
29  
30  
31  
32

### 33 **Statistical analyses**

34  
35 Participants' characteristics were analyzed using Pearson's Chi-square test for  
36 categorical variables, and Wilcoxon's rank-sum test and ANOVA for continuous  
37 variables. Nut consumption was categorized by quartiles based on the distribution of  
38 daily nut intake by the controls (Q1-Q4). Binary logistic regression models were used  
39 to estimate the odds ratios (ORs) and their 95% confidence intervals (CIs) for the  
40 associations between nut consumption and NAFLD risk. To account for the energy  
41 content of the nut, our initial model adjusted for total energy intake by using the  
42 residuals method. The final model adjusted for potential confounders, including age,  
43 income, smoking status, educational level, and tea-drinking status, occupational status,  
44 marital status, body mass index (BMI), physical activity, and history of diabetes,  
45 hypertension, and hyperlipidemia. In order to reflect the matching protocol, when  
46  
47  
48  
49  
50  
51  
52  
53  
54  
55  
56  
57  
58  
59  
60

1  
2  
3 adjust for age, we entered a term for residual age into the regression analysis<sup>20</sup>. The  
4  
5 final model also adjusted for MUFA and PUFA intake to control for their effects. The  
6  
7 selection of covariates for the final model was based on clinical significance, results  
8  
9 of previous studies. We tested for linear trends across categories of nut intake by  
10  
11 assigning each participant the median value for each category and modeling this value  
12  
13 as a continuous variable, consistent with prior studies<sup>21-23</sup>.  
14  
15

16  
17 We evaluated the influence of nut consumption across strata of other potential  
18  
19 confounders, comparing participants in the highest nut-consumption category to the  
20  
21 lowest nut-consumption category(reference). We also analyzed the interactions of nut  
22  
23 consumption with age, sex, BMI, smoking status, educational level, tea-drinking  
24  
25 status, and other factors. We used the medians of the continuous variables to  
26  
27 categorize them and evaluate the interactions. The criteria for statistical significance  
28  
29 of the likelihood-ratio test of interaction effects was  $P < 0.05$ . Statistical analyses  
30  
31 were performed using SPSS version 22 (IBM, Armonk, NY, US). All P-values were  
32  
33 2-tailed, and  $P < 0.05$  was considered statistically significant.  
34  
35  
36

## 37 **Results**

### 38 **Baseline Characteristics**

39  
40  
41 Table 1 presents health-related and demographic characteristics of the NAFLD  
42  
43 cases and matched controls. Compared with the controls, the NAFLD cases tended to  
44  
45 have a higher BMI, higher total intake of energy, higher MUFA and PUFA  
46  
47 consumption, and a higher number of participants with a history of hyperlipidemia  
48  
49 among both men and women. Patients with NAFLD had a lower educational level and  
50  
51 the men engaged in less physical activity than the controls. No statistically significant  
52  
53 associations were found for age, occupational status, income, marital status, smoking  
54  
55 status, history of diabetes, or hypertension between the cases and the controls.  
56  
57  
58  
59  
60

Table 1 General characteristics of cases and controls stratified by sex, n(%)

| Variables                       | Men (n=728)    |                 |                      | Women(n=340)       |                    |                      |
|---------------------------------|----------------|-----------------|----------------------|--------------------|--------------------|----------------------|
|                                 | Cases (n=364)  | Controls(n=364) | P-value <sup>a</sup> | Cases (n=170)      | Controls(n=170)    | P-value <sup>a</sup> |
| Age                             |                |                 | 0.66                 |                    |                    | 0.99                 |
| <40                             | 118(32.42)     | 116(31.87)      |                      | 25(14.71)          | 22(12.94)          |                      |
| 40~60                           | 217(59.61)     | 212(58.24)      |                      | 123(72.35)         | 122(71.76)         |                      |
| ≥60                             | 29(7.97)       | 36(9.89)        |                      | 22(12.94)          | 26(15.30)          |                      |
| Educational level               |                |                 | 0.04                 |                    |                    | 0.75                 |
| primary school and less than    | 10(2.75)       | 23(6.32)        |                      | 30(17.65)          | 26(15.29)          |                      |
| junior middle and high school   | 147(40.38)     | 128(35.16)      |                      | 76(44.70)          | 74(43.53)          |                      |
| junior college or above         | 207(56.87)     | 213(58.52)      |                      | 64(37.65)          | 70(41.18)          |                      |
| Occupational status             |                |                 | 0.39                 |                    |                    | 0.43                 |
| mental labour                   | 108(29.67)     | 104(28.57)      |                      | 50(29.41)          | 48(28.24)          |                      |
| physical labor                  | 86(23.63)      | 102(28.02)      |                      | 25(14.71)          | 34(20.00)          |                      |
| other                           | 170(46.70)     | 158(43.41)      |                      | 95(55.88)          | 88(51.76)          |                      |
| Income(yuan/month)              |                |                 | 0.35                 |                    |                    | 0.85                 |
| <2000                           | 17(4.67)       | 17(4.67)        |                      | 15(8.82)           | 18(10.59)          |                      |
| 2000~3000                       | 87(23.90)      | 104(28.57)      |                      | 70(41.18)          | 70(41.18)          |                      |
| ≥3000                           | 260(71.43)     | 243(66.76)      |                      | 85(50.00)          | 82(48.23)          |                      |
| Marital status                  |                |                 | 0.24                 |                    |                    | 0.52                 |
| single                          | 45(12.36)      | 56(15.38)       |                      | 4(2.35)            | 6(3.53)            |                      |
| married or other                | 319(87.64)     | 308(84.62)      |                      | 166(97.65)         | 164(96.47)         |                      |
| Smoking status                  |                |                 | 0.30                 |                    |                    | 0.16                 |
| never smoker                    | 199(54.67)     | 213(58.52)      |                      | 168(98.82)         | 170(100)           |                      |
| smoker                          | 165(45.33)     | 151(41.48)      |                      | 2(1.18)            | 0(0.00)            |                      |
| Tea-drinking status             |                |                 | 0.30                 |                    |                    | 0.01                 |
| yes                             | 258(70.88)     | 245(63.31)      |                      | 77(45.29)          | 55(32.35)          |                      |
| no                              | 106(29.12)     | 119(32.69)      |                      | 93(54.71)          | 115(67.55)         |                      |
| Physical activity               |                |                 | 0.02                 |                    |                    | 0.88                 |
| light                           | 175(48.08)     | 137(37.64)      |                      | 19(11.18)          | 19(11.18)          |                      |
| moderate                        | 100(27.47)     | 121(33.24)      |                      | 47(27.64)          | 43(25.29)          |                      |
| severe                          | 89(24.45)      | 106(29.12)      |                      | 104(61.18)         | 108(63.53)         |                      |
| BMI(kg/m <sup>2</sup> )         |                |                 | <0.001               |                    |                    | <0.001               |
| <18.5                           | 2(0.55)        | 11(3.02)        |                      | 1(0.59)            | 9(5.29)            |                      |
| 18.5~24.0                       | 107(29.40)     | 257(70.61)      |                      | 72(42.35)          | 125(73.53)         |                      |
| ≥24.0                           | 255(70.05)     | 96(26.37)       |                      | 97(57.06)          | 36(21.18)          |                      |
| History of diabetes             |                |                 | 0.67                 |                    |                    | 0.18                 |
| yes                             | 12(3.30)       | 10(2.75)        |                      | 10(5.88)           | 5(2.94)            |                      |
| no                              | 352(96.70)     | 354(97.25)      |                      | 160(94.12)         | 165(94.06)         |                      |
| History of hypertension         |                |                 | 0.85                 |                    |                    | 0.63                 |
| yes                             | 15(4.12)       | 16(4.40)        |                      | 8(4.71)            | 10(5.88)           |                      |
| no                              | 349(95.88)     | 348(95.60)      |                      | 162(95.29)         | 160(94.12)         |                      |
| History of hyperlipidemia       |                |                 | 0.01                 |                    |                    | <0.001               |
| yes                             | 108(29.67)     | 77(21.15)       |                      | 51(30.00)          | 21(12.35)          |                      |
| no                              | 256(70.33)     | 287(78.85)      |                      | 119(70.00)         | 149(87.65)         |                      |
| MUFA intake,g/d <sup>b</sup>    | 34.10(28.49,39 | 31.39(26.55,36. | <0.001               | 29.99(26.37,36.37) | 28.05(22.40,31.39) | <0.001               |
| PUFA intake,g/d <sup>b</sup>    | 26.25(24.04,29 | 23.90(22.01,26. | <0.001               | 24.52(22.11,27.12) | 21.21(18.83,24.53) | <0.001               |
| Energy intake,kJ/d <sup>c</sup> | 10395.64±242   | 9890.97±2348.7  | 0.01                 | 7509.73±1650.71    | 7323.78±1852.97    | 0.04                 |

<sup>a</sup>P-values were calculated by using the Chi-square test for categorical variables and Wilcoxon rank sum test and ANOVA test for continues variables.

<sup>b</sup>Medians (IQRs).

For peer review only - <http://bmjopen.bmj.com/site/about/guidelines.xhtml>

<sup>c</sup>Mean(s.d).

### The associations of dietary nut intake with NAFLD

The participants' nut consumption is summarized in Table 2. Among the women, those in the NAFLD group consumed a significantly higher amount of nuts (6.80 g/d vs. 2.50 g/d;  $P = 0.02$ ) than those in the control group. No statistically significant differences were found between the cases and controls in the the sample or among the male participants. In order to adjust for potential confounding factors, quartile distributions of dietary nut consumption among the controls were used to categorize the nut intake of all the participants; the results are shown in Table 3. After adjusting for potential confounders, nut consumption was not associated with NAFLD risk among the participants in the sample. When the fully adjusted model was stratified by sex, a significant inverse association was found between nut consumption and NAFLD, but only among the men in the highest quartile (OR = 0.43; 95% CI: 0.26–0.71;  $P_{\text{trend}} = 0.01$ ).

Table 2 Comparison of nut daily intake between the case and the control

| Nut intake<br>(g/d) | Case   |           | Control |           | $P$ -value <sup>a</sup> | $P$ -value <sup>b</sup> |
|---------------------|--------|-----------|---------|-----------|-------------------------|-------------------------|
|                     | Median | Quartile  | Median  | Quartile  |                         |                         |
| Total population    | 3.15   | 1.46-8.80 | 2.86    | 1.22-8.98 | 0.35                    | 0.18                    |
| Men                 | 2.68   | 1.15-8.43 | 2.86    | 1.22-8.98 | 0.36                    | 0.94                    |
| Women               | 6.80   | 1.75-8.86 | 2.50    | 1.07-7.84 | 0.01                    | 0.02                    |

<sup>a</sup> $P$ -values:calculated by using Wilcoxon rank sum test;before adjusting for energy.

<sup>b</sup> $P$ -values :calculated by using Wilcoxon rank sum test; after adjusting for energy by using the residuals methods.

Table 3 Odds ratios (OR) and 95% confidence intervals (CI) for NAFLD in relation to nut intake

| Nut intake                    | Case<br><i>n</i> | Control<br><i>n</i> | Crude OR(95%CI) | Model 1 <sup>a</sup><br>OR(95%CI) | Model 2 <sup>a</sup><br>OR(95%CI) |
|-------------------------------|------------------|---------------------|-----------------|-----------------------------------|-----------------------------------|
| Total population <sup>b</sup> | 534              | 534                 |                 |                                   |                                   |
| Q1                            | 125              | 133                 | 1               | 1                                 | 1                                 |
| Q2                            | 112              | 134                 | 1.30(0.93-1.81) | 0.89(0.63-1.26)                   | 0.85(0.56-1.29)                   |
| Q3                            | 159              | 134                 | 1.77(1.29-2.44) | 1.26(0.90-1.77)                   | 1.01(0.68-1.50)                   |
| Q4                            | 138              | 133                 | 1.17(0.81-1.68) | 1.10(0.78-1.55)                   | 0.67(0.44-1.02)                   |
| <i>P</i> for trend*           |                  |                     | 0.46            | 0.45                              | 0.07                              |
| Men                           | 364              | 364                 |                 |                                   |                                   |
| Q1                            | 106              | 102                 | 1               | 1                                 | 1                                 |
| Q2                            | 91               | 79                  | 1.31(0.88-1.94) | 0.90(0.60-1.35)                   | 0.88(0.54-1.43)                   |
| Q3                            | 74               | 123                 | 1.81(1.24-2.65) | 1.73(1.16-2.57)                   | 1.34(0.84-2.16)                   |
| Q4                            | 93               | 60                  | 1.04(0.66-1.63) | 0.67(0.44-1.02)                   | 0.43(0.26-0.71)                   |
| <i>P</i> for trend*           |                  |                     | 0.81            | 0.04                              | 0.01                              |
| Women                         | 170              | 170                 |                 |                                   |                                   |
| Q1                            | 23               | 27                  | 1               | 1                                 | 1                                 |
| Q2                            | 33               | 43                  | 1.28(0.69-2.37) | 0.90(0.44-1.85)                   | 0.84(0.36-1.97)                   |
| Q3                            | 36               | 60                  | 1.71(0.95-3.08) | 0.70(0.35-1.41)                   | 0.55(0.24-1.25)                   |
| Q4                            | 78               | 40                  | 1.41(0.76-2.64) | 2.29(1.17-4.49)                   | 1.30(0.57-2.95)                   |
| <i>P</i> for trend*           |                  |                     | 0.36            | <0.001                            | 0.12                              |

<sup>a</sup>Model 1: Adjusted for total energy intake.

<sup>a</sup>Model 2: Adjusted further for age, income, smoking status, educational level, teaing status, occupationanl status, marital status, body mass index, physical activity, the history of diabetes, hypertension and hyperlipidemia, MUFA and PUFA intake.

<sup>b</sup>: further adiusted for sex.

\**P* for trend: Trend across intake levels with the categorical median.

For total population: Q1, <1.46 g/d; Q2, 1.46-3.15 g/d; Q3, 3.15-8.80 g/d; Q4, ≥8.80 g/d

For men: Q1, <1.15 g/d; Q2, 1.15-2.68 g/d; Q3, 2.68-8.43 g/d; Q4, ≥8.43g/d

For women: Q1, <1.75 g/d; Q2, 1.75-6.80 g/d; Q3, 6.80-8.86 g/d; Q4, ≥8.86 g/d.

### Stratified Analyses

In the stratified analysis, the inverse association between total-nut consumption and NAFLD risk was consistent across strata of age, sex, BMI, educational level, income, physical activity, smoking, tea drinking, and history of diabetes, hypertension, and hyperlipidemia. In addition to the association between nut consumption and

1  
2  
3 NAFLD in men, we also found the highest nut-consumption category was associated  
4 with a lower risk of developing NAFLD than the reference (OR = 0.53; 95% CI:  
5 0.31–0.93) among the participants who engaged in light and moderate physical  
6 activity. No significant interactions of total nut consumption and the potentially  
7 confounding effects of NAFLD risk factors were identified (Figure 1).  
8  
9  
10  
11  
12  
13

## 14 **Discussion**

15  
16  
17 In this case-control study, we found a significant inverse relationship between  
18 high nut consumption and NAFLD risk among the males, but found either no or  
19 unclear associations among the females and the overall sample. Moreover, the  
20 associations seemed to be independent of other predictors, including diet and lifestyle  
21 factors. The effect of nut consumption remained among men after controlling for  
22 other known or suspected risk factors for developing NAFLD. Furthermore, no  
23 significant interactions between nut consumption and the potential modifying effects  
24 of NAFLD risk factors were identified. To the best of our knowledge, this was the  
25 first study to assess the association between nut consumption and the risk of NAFLD  
26 in a Chinese sample.  
27  
28  
29  
30  
31  
32  
33  
34  
35  
36  
37  
38  
39

40 Our results are consistent with a previous study conducted in Korea, which found  
41 that a low intake of nuts and seeds (OR = 3.66;  $P_{\text{trend}} = 0.007$ ) was associated with a  
42 significantly higher risk of developing NAFLD among male participants, but not  
43 among females<sup>24</sup>. Although another case-control study found an association between  
44 a high intake of nuts with a lower likelihood of NAFLD, after adjusting for the  
45 confounders age, sex, waist circumference, and the values of the homeostasis model  
46 assessment of insulin resistance (OR = 0.61; 95% CI: 0.38–0.98), the association  
47 disappeared after further adjustment for adiponectin and TNF- $\alpha$  (OR = 0.72; 95% CI:  
48 0.41–1.25)<sup>18</sup>. However, the study did not examine nut intake separately; therefore,  
49  
50  
51  
52  
53  
54  
55  
56  
57  
58  
59  
60

1  
2  
3 the results cannot be directly compared with those of our study. Although the results  
4  
5 of our study suggest nuts may play a protective role in the development of NAFLD in  
6  
7 males, a significant association between nut intake and the risk of NAFLD was not  
8  
9 found in females. NAFLD has been regarded as the “hepatic manifestation of MetS”;  
10  
11 therefore, our findings are indirectly supported by several studies showing an inverse  
12  
13 correlation between high nut intake and the risk of T2D and cardiovascular disease,  
14  
15 which share common metabolic parameters with NAFLD <sup>25-27</sup>. Nevertheless, the  
16  
17 relationship between nut intake and NAFLD warrants further exploration, and  
18  
19 additional studies are needed to examine gender differences in the association  
20  
21 between nut consumption and NAFLD, and its’ possible mechanisms should be  
22  
23 explored.  
24  
25  
26  
27

28  
29 Several biological pathways have been proposed to explain the association  
30  
31 between nut intake and NAFLD risk. Ellagic acid, a natural antioxidant polyphenol  
32  
33 found in nuts, can suppress oxidative stress and inflammation <sup>28</sup> and improve hepatic  
34  
35 insulin sensitivity and lipid metabolism <sup>29</sup>. Vitamin E and selenium in almonds and  
36  
37 walnuts, as well as folic acid and resveratrol in pine nuts, have been reported to have  
38  
39 beneficial effects on NAFLD. Numerous trials testing the therapeutic value of vitamin  
40  
41 E in NAFLD prevention found that Vitamin E significantly improved liver function  
42  
43 and histologic changes by significantly reducing aspartate aminotransferase, alanine  
44  
45 aminotransferase, steatosis, and inflammation in patients with NAFLD/non-alcoholic  
46  
47 steatohepatitis (NASH) <sup>30</sup>. Selenium is an antioxidant agent, and selenium deficiency  
48  
49 is associated with insulin resistance in patients with chronic liver disease <sup>31</sup>. Folate  
50  
51 plays an essential role in lipid metabolism and folic acid supplementation can  
52  
53 attenuate steatosis and improve oxidative stress in rodent models of NAFLD. Folate  
54  
55 can also blunt the increase of inflammatory cytokines secreted by immune cells <sup>32</sup>.  
56  
57  
58  
59  
60



1  
2  
3 Resveratrol has antioxidant, anti-apoptotic, and anti-inflammatory properties in  
4 NAFLD patients <sup>33</sup>. Nuts, which are known to be rich in unsaturated fatty acids, are  
5 especially rich in n-3 PUFAs, a source of alpha-linolenic acid, which lowers LDL  
6 cholesterol <sup>34</sup>, and has been found to have beneficial effects on NAFLD <sup>35</sup>. Each type  
7 of nut has many nutrients and phytochemicals that may be beneficial to health, and it  
8 is likely that unknown salubrious effects of nuts may be related to NAFLD prevention.  
9  
10 Moreover, many studies have shown a beneficial association between high nut intake  
11 and decreased risk of obesity <sup>36</sup>, T2D <sup>37</sup>, and MetS <sup>38</sup>, which are risk factors for  
12 NAFLD.  
13  
14

15  
16  
17 Our study has both strengths and limitations. The first strength is the large sample size,  
18 which may have reduced type II errors. Second, the collection of data using  
19 face-to-face interviews and a semi-quantitative food frequency questionnaire, which  
20 elicited extensive information on anthropometrics and lifestyle factors, allowed us to  
21 adjust for confounding factors. Finally, the study tried to investigate interactions  
22 between nut intake and other risk factors, for which a biologically plausible  
23 mechanism may exist. Nonetheless, several limitations should be considered when  
24 interpreting the study's findings. First, although we accounted for a wide range of  
25 socioeconomic characteristics and lifestyle factors, we cannot exclude the effects of  
26 unknown or poorly measured confounding variables or residual confounding  
27 attributable to other dietary/lifestyle factors, which might have influenced the  
28 observed associations. However, the associations persisted even after controlling for  
29 known and suspected predictors of NAFLD. Second, the intake of nuts was assessed  
30 by asking about using one question; therefore, we could not investigate the effects of  
31  
32  
33  
34  
35  
36  
37  
38  
39  
40  
41  
42  
43  
44  
45  
46  
47  
48  
49  
50  
51  
52  
53  
54  
55  
56  
57  
58  
59  
60

1  
2  
3  
4 different types of nuts, such as peanuts and walnuts, which contain different amounts  
5  
6 of energy, fat content, and other nutrients<sup>39</sup>. Third, categorization of the intake of nuts  
7  
8 in quartiles may lead to bias and inefficiency. Fourth, we did not consider  
9  
10 manufacturing methods (e.g., raw, roasted, or boiled) or extra ingredients (e.g., sugar,  
11  
12 salt, seasoning). Different preparation methods before and after roasting, the amount  
13  
14 of time roasted, and the temperature used can affect the nutrient composition and  
15  
16 ingredients in the nuts<sup>40 41</sup>. What's more, the item 'nuts' in the FFQ used in this study  
17  
18 cannot represent all nuts, because it only included peanuts, walnuts, seeds. For this  
19  
20 reason, direct comparisons with the results of other studies may be difficult. Fifth,  
21  
22 because we used a case-control study design, recall bias is an inherent limitation.  
23  
24 People who are health-conscious may over-report or under-report some food items.  
25  
26 However, the protective effect of nuts on NAFLD was not generally known at the  
27  
28 time of the survey, and thus, should be unrelated to recall bias. In addition, the  
29  
30 stratified analyses was not corrected for multiple testing, which may inflate the risk  
31  
32 for type I error. Sixth, NAFLD is a spectrum of disease ranging from essentially  
33  
34 benign simple steatosis (fatty infiltration of the liver) to the more severe form  
35  
36 non-alcoholic steatohepatitis (NASH- fat with inflammation and/or fibrosis). In the  
37  
38 present study, the data about the severity of NAFLD was absent, therefore we did not  
39  
40 analysis the association between nuts intake and the the severity of NAFLD. Seventh,  
41  
42 lack of interactions association between nut intake and other risk factors may be due  
43  
44 to lack of power, and a small interactive effect on NAFLD cannot be ruled out.  
45  
46 Finally, due to the small number of participants in the highest nut-intake category, we  
47  
48  
49  
50  
51  
52  
53  
54  
55  
56  
57  
58  
59  
60

1  
2  
3  
4 cannot rule out the possibility that some of our results are due to chance. However,  
5  
6 the associations were consistent in the analyses stratified by some of the other factors,  
7  
8 which reduces the likelihood of chance findings. In these stratified analyses, the  
9  
10 statistical power needed to detect differences was limited by the sample size, and such  
11  
12 analyses should be considered exploratory.  
13  
14  
15

16 Our study had a retrospective design, which is lower on the evidence hierarchy than  
17  
18 prospective studies. Nevertheless, case-control studies can provide evidence  
19  
20 supporting the general relationship between diet and NAFLD, as there currently are  
21  
22 no available prospective studies.  
23  
24

25 In conclusion, this case-control study indicated that high nut intake was associated  
26  
27 with a significantly reduced risk of NAFLD among Han men in China. However, no  
28  
29 relationship was found between total nut intake and NAFLD risk among the Han  
30  
31 women. Our data contribute to the growing evidence showing that a relatively simple  
32  
33 prevention strategy of incorporating a modest amount of nuts in the diet may  
34  
35 contribute to maintaining good health at both the individual and population levels.  
36  
37  
38  
39  
40  
41  
42  
43  
44  
45  
46  
47  
48  
49  
50  
51  
52  
53  
54  
55  
56  
57  
58  
59  
60

## Acknowledgements

We thank all study participants for their cooperation. We also thank our staff for recruiting participants and for their technical assistance.

## Contributors

BBC and YH are joint first authors. XEP obtained funding. XEP, XL and SHX designed the study. XTP, JHY, YFL and WJL collected the data. BBC and YH were involved in data cleaning and verification. BBC and XTP analyzed the data. BBC and YH drafted the manuscript. XEP, YFL and JHY contributed to the interpretation of the results and critical revision of the manuscript for important intellectual content and approved the final version of the manuscript. All authors have read and approved the final manuscript.

## Data sharing

Extra data can be accessed via the Dryad data repository at <http://datadryad.org/> with the doi:10.5061/dryad.8nn2j46

## Conflict of Interest

The authors declare that they have no conflict of interest.

## Funding

This work was supported by the National Natural Science Foundation of China [grant number 81473047], the National Natural Science Foundation of Fujian Province [grant number 2019J01316], and the Joint Innovation Project of Science and Technology of Fujian Province [grant number 2017Y9104].

## References

1. Maurice J, Manousou P. Non-alcoholic fatty liver disease. *Clin Med (Lond)* 2018;**18(3)**:245-50. doi: 10.7861/clinmedicine.18-3-245
2. Rietman A, Sluik D, Feskens E, *et al.* Associations between dietary factors and markers of NAFLD in a general Dutch adult population. *Eur J Clin Nutr* 2018;**72(1)**:117-23. doi: 10.1038/ejcn.2017.148
3. Fan J. Epidemiology of alcoholic and nonalcoholic fatty liver disease in China. *J Gastroenterol Hepatol* 2013;**28 Suppl 1**:11-17. doi: 10.1111/jgh.12036
4. Katsagoni C, Georgoulis M, Papatheodoridis G, *et al.* Effects of lifestyle interventions on clinical characteristics of patients with non-alcoholic fatty liver disease: A meta-analysis. *Metab Clin Exp* 2017;**68**:119-32. doi: 10.1016/j.metabol.2016.12.006
5. Zelber-Sagi S, Salomone F, Mlynarsky L. The Mediterranean dietary pattern as the diet of choice for non-alcoholic fatty liver disease: Evidence and plausible mechanisms. *Liver Int* 2017;**37(7)**:936-49. doi: 10.1111/liv.13435
6. Kosmidou M, Milionis H. Diabetes mellitus and non-alcoholic fatty liver disease: the thread of Ariadne. *Minerva Endocrinol* 2017;**42(2)**:109-21. doi: 10.23736/S0391-1977.16.02562-1
7. Petrović G, Bjelaković G, Benedeto-Stojanov D, *et al.* Obesity and metabolic syndrome as risk factors for the development of non-alcoholic fatty liver disease as diagnosed by ultrasound. *Vojnosanit Pregl* 2016;**73(10)**:910-20. doi: 10.2298/vsp150514093p
8. Ros E. Health benefits of nut consumption. *Nutrients* 2010;**2(7)**:652-82. doi: 10.3390/nu2070652
9. Lee J, Shin A, Oh JH, *et al.* The relationship between nut intake and risk of colorectal cancer: a case control study. *Nutr J* 2018;**17(1)**:37. doi: 10.1186/s12937-018-0345-y
10. Lahong J, Dongmei Y, Xiaoli X. Status and variation trend of nut intake among Chinese residents,2010-2012. *Chin J Public Health* 2017;**33(6)**:916-18.

- 1  
2  
3  
4 11. Larsson S, Drca N, Björck M, *et al.* Nut consumption and incidence of seven  
5  
6 cardiovascular diseases. *Heart* 2018 doi: 10.1136/heartjnl-2017-312819
- 7  
8 12. Asghari G, Ghorbani Z, Mirmiran P, *et al.* Nut consumption is associated with  
9  
10 lower incidence of type 2 diabetes: The Tehran Lipid and Glucose Study.  
11  
12 *Diabetes Metab* 2017;**43(1)**:18-24. doi: 10.1016/j.diabet.2016.09.008
- 13  
14 13. O'Neil C, Fulgoni V, Nicklas T. Tree Nut consumption is associated with better  
15  
16 adiposity measures and cardiovascular and metabolic syndrome health risk  
17  
18 factors in U.S. Adults: NHANES 2005-2010. *Nutr J* 2015;**14**:64. doi:  
19  
20 10.1186/s12937-015-0052-x
- 21  
22 14. Casas-Agustench P, López-Uriarte P, Bulló M, *et al.* Effects of one serving of  
23  
24 mixed nuts on serum lipids, insulin resistance and inflammatory markers in  
25  
26 patients with the metabolic syndrome. *Nutr Metab Cardiovasc Dis*  
27  
28 2011;**21(2)**:126-35. doi: 10.1016/j.numecd.2009.08.005
- 29  
30 15. Hernández-Alonso P, Salas-Salvadó J, Baldrich-Mora M, *et al.* Beneficial effect  
31  
32 of pistachio consumption on glucose metabolism, insulin resistance,  
33  
34 inflammation, and related metabolic risk markers: a randomized clinical trial.  
35  
36 *Diabetes Care* 2014;**37(11)**:3098-105. doi: 10.2337/dc14-1431
- 37  
38 16. Grosso G, Yang J, Marventano S, *et al.* Nut consumption on all-cause,  
39  
40 cardiovascular, and cancer mortality risk: a systematic review and  
41  
42 meta-analysis of epidemiologic studies. *Am J Clin Nutr* 2015;**101(4)**:783-93.  
43  
44 doi: 10.3945/ajcn.114.099515
- 45  
46 17. Dreher M, Maher C, Kearney P. The traditional and emerging role of nuts in  
47  
48 healthful diets. *Nutr Rev* 1996;**54(8)**:241-45.
- 49  
50 18. Katsagoni C, Georgoulis M, Papatheodoridis G, *et al.* Associations Between  
51  
52 Lifestyle Characteristics and the Presence of Nonalcoholic Fatty Liver  
53  
54 Disease: A Case-Control Study. *Metab Syndr Relat Disord* 2017;**15(2)**:72-79.  
55  
56 doi: 10.1089/met.2016.0105
- 57  
58 19. Ke L, Toshiro T, Fengyan S, *et al.* Relative validity of a semi-quantitative food  
59  
60 frequency questionnaire versus 3 day weighed diet records in middle-aged  
inhabitants in Chaoshan area, China. *Asian Pacific journal of cancer*

- 1  
2  
3  
4  
5  
6  
7  
8  
9  
10  
11  
12  
13  
14  
15  
16  
17  
18  
19  
20  
21  
22  
23  
24  
25  
26  
27  
28  
29  
30  
31  
32  
33  
34  
35  
36  
37  
38  
39  
40  
41  
42  
43  
44  
45  
46  
47  
48  
49  
50  
51  
52  
53  
54  
55  
56  
57  
58  
59  
60
- prevention* : *APJCP* 2005;**6(3)**:376-81.
20. Mansournia MA, Jewell NP, Greenland S. Case-control matching: effects, misconceptions, and recommendations. *European journal of epidemiology* 2018;**33(1)**:5-14. doi: 10.1007/s10654-017-0325-0
21. Fadelu T, Zhang S, Niedzwiecki D, *et al.* Nut Consumption and Survival in Patients With Stage III Colon Cancer: Results From CALGB 89803 (Alliance). *Journal of clinical oncology : official journal of the American Society of Clinical Oncology* 2018;**36(11)**:1112-20. doi: 10.1200/JCO.2017.75.5413
22. Fuchs MA, Sato K, Niedzwiecki D, *et al.* Sugar-sweetened beverage intake and cancer recurrence and survival in CALGB 89803 (Alliance). *PloS one* 2014;**9(6)**:e99816. doi: 10.1371/journal.pone.0099816
23. Meyerhardt JA, Sato K, Niedzwiecki D, *et al.* Dietary glycemic load and cancer recurrence and survival in patients with stage III colon cancer: findings from CALGB 89803. *Journal of the National Cancer Institute* 2012;**104(22)**:1702-11. doi: 10.1093/jnci/djs399
24. Han JM, Jo AN, Lee SM, *et al.* Associations between intakes of individual nutrients or whole food groups and non-alcoholic fatty liver disease among Korean adults. *Journal of Gastroenterology and Hepatology* 2014;**29(6)**:1265-72. doi: 10.1111/jgh.12520
25. Edens M, Kuipers F, Stolk R. Non-alcoholic fatty liver disease is associated with cardiovascular disease risk markers. *Obes Rev* 2009;**10(4)**:412-19. doi: 10.1111/j.1467-789X.2009.00594.x
26. Lonardo A, Ballestri S, Guaraldi G, *et al.* Fatty liver is associated with an increased risk of diabetes and cardiovascular disease - Evidence from three different disease models: NAFLD, HCV and HIV. *World J Gastroenterol* 2016;**22(44)**:9674-93. doi: 10.3748/wjg.v22.i44.9674
27. Gastaldelli A. Insulin resistance and reduced metabolic flexibility: cause or consequence of NAFLD? *Clin Sci* 2017;**131(22)**:2701-04. doi: 10.1042/CS20170987

- 1  
2  
3  
4 28. Panchal SK, Ward L, Brown L. Ellagic acid attenuates high-carbohydrate, high-fat  
5 diet-induced metabolic syndrome in rats. *Eur J Nutr* 2013;**52(2)**:559-68. doi:  
6 10.1007/s00394-012-0358-9  
7  
8  
9  
10 29. Polce S, Burke C, França L, *et al.* Ellagic Acid Alleviates Hepatic Oxidative  
11 Stress and Insulin Resistance in Diabetic Female Rats. *Nutrients*  
12 2018;**10(5)**:1-15. doi: 10.3390/nu10050531  
13  
14  
15 30. Sato K, Gosho M, Yamamoto T, *et al.* Vitamin E has a beneficial effect on  
16 nonalcoholic fatty liver disease: a meta-analysis of randomized controlled  
17 trials. *Nutrition* 2015;**31(7-8)**:923-30. doi: 10.1016/j.nut.2014.11.018  
18  
19  
20  
21 31. Himoto T, Yoneyama H, Kurokohchi K, *et al.* Selenium deficiency is associated  
22 with insulin resistance in patients with hepatitis C virus-related chronic liver  
23 disease. *Nutr Res* 2011;**31(11)**:829-35. doi: 10.1016/j.nutres.2011.09.021  
24  
25  
26  
27 32. Sid V, Siow Y, O K. Role of folate in nonalcoholic fatty liver disease. *Can J*  
28 *Physiol Pharmacol* 2017;**95(10)**:1141-48. doi: 10.1139/cjpp-2016-0681  
29  
30  
31 33. Hajighasem A, Farzanegi P, Mazaheri Z. Effects of combined therapy with  
32 resveratrol, continuous and interval exercises on apoptosis, oxidative stress,  
33 and inflammatory biomarkers in the liver of old rats with non-alcoholic fatty  
34 liver disease. *Arch Physiol Biochem* 2018:1-8. doi:  
35 0.1080/13813455.2018.1441872  
36  
37  
38  
39  
40  
41 34. Jeznach-Steinhagen A, Ostrowska J, Czerwonogrodzka-Senczyna A, *et al.*  
42 [Dietary recommendation for non-alcoholic fatty liver disease]. *Pol Merkur*  
43 *Lekarski* 2017;**43(258)**:281-86.  
44  
45  
46  
47 35. Musa-Veloso K, Venditti C, Lee H, *et al.* Systematic review and meta-analysis of  
48 controlled intervention studies on the effectiveness of long-chain omega-3  
49 fatty acids in patients with nonalcoholic fatty liver disease. *Nutr Rev*  
50 2018;**0(0)**:1-22. doi: 10.1093/nutrit/nuy022  
51  
52  
53  
54 36. Mohammadifard N, Yazdekhosti N, Stangl G, *et al.* Inverse association between  
55 the frequency of nut consumption and obesity among Iranian population:  
56 Isfahan Healthy Heart Program. *Eur J Nutr* 2015;**54(6)**:925-31. doi:  
57 10.1007/s00394-014-0769-x  
58  
59  
60



- 1  
2  
3  
4 37. Hernández-Alonso P, Camacho-Barcia L, Bulló M, *et al.* Nuts and Dried Fruits:  
5 An Update of Their Beneficial Effects on Type 2 Diabetes. *Nutrients*  
6 2017;**9(7)**:673. doi: 10.3390/nu9070673  
7  
8  
9 38. Hosseinpour-Niazi S, Hosseini S, Mirmiran P, *et al.* Prospective Study of Nut  
10 Consumption and Incidence of Metabolic Syndrome: Tehran Lipid and  
11 Glucose Study. *Nutrients* 2017;**9(10)**:1056. doi: 10.3390/nu9101056  
12  
13  
14 39. Wu L, Wang Z, Zhu J, *et al.* Nut consumption and risk of cancer and type 2  
15 diabetes: a systematic review and meta-analysis. *Nutr Rev* 2015;**73(7)**:409-25.  
16 doi: 10.1093/nutrit/nuv006  
17  
18  
19 40. Schlörmann W, Birringer M, Böhm V, *et al.* Influence of roasting conditions on  
20 health-related compounds in different nuts. *Food Chem* 2015;**180**:77-85. doi:  
21 10.1016/j.foodchem.2015.02.017  
22  
23  
24 41. Hosseini Bai S, Darby I, Nevenimo T, *et al.* Effects of roasting on kernel peroxide  
25 value, free fatty acid, fatty acid composition and crude protein content. *PLoS*  
26 *ONE* 2017;**12(9)**:e0184279. doi: 10.1371/journal.pone.0184279  
27  
28  
29  
30  
31  
32  
33  
34  
35  
36  
37  
38  
39  
40  
41  
42  
43  
44  
45  
46  
47  
48  
49  
50  
51  
52  
53  
54  
55  
56  
57  
58  
59  
60

### Figure legends

Figure 1. Odds ratios (OR) and 95% CIs for NAFLD across the strata of various factors.

The forest plot represents the ORs of the comparison of the lowest nut-intake category versus the highest nut-intake category, adjusting for age, income, smoking status, educational level, tea-drinking status, occupational status, marital status, BMI, physical activity, history of diabetes, hypertension and hyperlipidemia, total energy intake, and MUFA and PUFA intake.  $P$ -values are two-tailed;  $P_{\text{inter}}$  indicates  $P$  for the interaction between strata and nut intake;  $P_{\text{trend}}$  indicates  $P$  for the trend across levels of nut intake.



Figure 1. Odds ratios (OR) and 95% CIs for NAFLD across the strata of various factors. The forest plot represents the ORs of the comparison of the lowest nut-intake category versus the highest nut-intake category, adjusting for age, income, smoking status, educational level, tea-drinking status, occupational status, marital status, BMI, physical activity, history of diabetes, hypertension and hyperlipidemia, total energy intake, and MUFA and PUFA intake. P-values are two-tailed; Pinter indicates P for the interaction between strata and nut intake; Ptrend indicates P for the trend across levels of nut intake.

148x159mm (96 x 96 DPI)

**STROBE 2007 (v4) Statement—Checklist of items that should be included in reports of *case-control studies***

| Section/Topic             | Item # | Recommendation                                                                                                                                                                       | Reported on page # |
|---------------------------|--------|--------------------------------------------------------------------------------------------------------------------------------------------------------------------------------------|--------------------|
| Title and abstract        | 1      | (a) Indicate the study’s design with a commonly used term in the title or the abstract                                                                                               | 1                  |
|                           |        | (b) Provide in the abstract an informative and balanced summary of what was done and what was found                                                                                  | 2                  |
| <b>Introduction</b>       |        |                                                                                                                                                                                      |                    |
| Background/rationale      | 2      | Explain the scientific background and rationale for the investigation being reported                                                                                                 | 3                  |
| Objectives                | 3      | State specific objectives, including any prespecified hypotheses                                                                                                                     | 4                  |
| <b>Methods</b>            |        |                                                                                                                                                                                      |                    |
| Study design              | 4      | Present key elements of study design early in the paper                                                                                                                              | 4                  |
| Setting                   | 5      | Describe the setting, locations, and relevant dates, including periods of recruitment, exposure, follow-up, and data collection                                                      | 4                  |
| Participants              | 6      | (a) Give the eligibility criteria, and the sources and methods of case ascertainment and control selection. Give the rationale for the choice of cases and controls                  | 5                  |
|                           |        | (b) For matched studies, give matching criteria and the number of controls per case                                                                                                  | 5                  |
| Variables                 | 7      | Clearly define all outcomes, exposures, predictors, potential confounders, and effect modifiers. Give diagnostic criteria, if applicable                                             | 5-6                |
| Data sources/ measurement | 8*     | For each variable of interest, give sources of data and details of methods of assessment (measurement). Describe comparability of assessment methods if there is more than one group | 5-6                |
| Bias                      | 9      | Describe any efforts to address potential sources of bias                                                                                                                            | 7                  |

1  
2  
3  
4  
5  
6  
7  
8  
9  
10  
11  
12  
13  
14  
15  
16  
17  
18  
19  
20  
21  
22  
23  
24  
25  
26  
27  
28  
29  
30  
31  
32  
33  
34  
35  
36  
37  
38  
39  
40  
41  
42  
43  
44  
45  
46

|                        |     |                                                                                                                                                                                                              |       |
|------------------------|-----|--------------------------------------------------------------------------------------------------------------------------------------------------------------------------------------------------------------|-------|
| Study size             | 10  | Explain how the study size was arrived at                                                                                                                                                                    | 5     |
| Quantitative variables | 11  | Explain how quantitative variables were handled in the analyses. If applicable, describe which groupings were chosen and why                                                                                 | 5-6   |
| Statistical methods    | 12  | (a) Describe all statistical methods, including those used to control for confounding                                                                                                                        | 6-7   |
|                        |     | (b) Describe any methods used to examine subgroups and interactions                                                                                                                                          | 7     |
|                        |     | (c) Explain how missing data were addressed                                                                                                                                                                  |       |
|                        |     | (d) If applicable, explain how matching of cases and controls was addressed                                                                                                                                  | 5     |
|                        |     | (e) Describe any sensitivity analyses                                                                                                                                                                        |       |
| <b>Results</b>         |     |                                                                                                                                                                                                              |       |
| Participants           | 13* | (a) Report numbers of individuals at each stage of study—eg numbers potentially eligible, examined for eligibility, confirmed eligible, included in the study, completing follow-up, and analysed            |       |
|                        |     | (b) Give reasons for non-participation at each stage                                                                                                                                                         |       |
|                        |     | (c) Consider use of a flow diagram                                                                                                                                                                           |       |
| Descriptive data       | 14* | (a) Give characteristics of study participants (eg demographic, clinical, social) and information on exposures and potential confounders                                                                     | 8-9   |
|                        |     | (b) Indicate number of participants with missing data for each variable of interest                                                                                                                          |       |
| Outcome data           | 15* | Report numbers in each exposure category, or summary measures of exposure                                                                                                                                    | 8-9   |
| Main results           | 16  | (a) Give unadjusted estimates and, if applicable, confounder-adjusted estimates and their precision (eg, 95% confidence interval). Make clear which confounders were adjusted for and why they were included | 9-10  |
|                        |     | (b) Report category boundaries when continuous variables were categorized                                                                                                                                    | 10-11 |

|                          |    |                                                                                                                                                                            |       |
|--------------------------|----|----------------------------------------------------------------------------------------------------------------------------------------------------------------------------|-------|
|                          |    | (c) If relevant, consider translating estimates of relative risk into absolute risk for a meaningful time period                                                           |       |
| Other analyses           | 17 | Report other analyses done—eg analyses of subgroups and interactions, and sensitivity analyses                                                                             | 11    |
| <b>Discussion</b>        |    |                                                                                                                                                                            |       |
| Key results              | 18 | Summarise key results with reference to study objectives                                                                                                                   | 12    |
| Limitations              | 19 | Discuss limitations of the study, taking into account sources of potential bias or imprecision.<br>Discuss both direction and magnitude of any potential bias              | 14    |
| Interpretation           | 20 | Give a cautious overall interpretation of results considering objectives, limitations, multiplicity of analyses, results from similar studies, and other relevant evidence | 12-14 |
| Generalisability         | 21 | Discuss the generalisability (external validity) of the study results                                                                                                      | 15    |
| <b>Other information</b> |    |                                                                                                                                                                            |       |
| Funding                  | 22 | Give the source of funding and the role of the funders for the present study and, if applicable, for the original study on which the present article is based              | 17    |

\*Give information separately for cases and controls in case-control studies and, if applicable, for exposed and unexposed groups in cohort and cross-sectional studies.

**Note:** An Explanation and Elaboration article discusses each checklist item and gives methodological background and published examples of transparent reporting. The STROBE checklist is best used in conjunction with this article (freely available on the Web sites of PLoS Medicine at <http://www.plosmedicine.org/>, Annals of Internal Medicine at <http://www.annals.org/>, and Epidemiology at <http://www.epidem.com/>). Information on the STROBE Initiative is available at [www.strobe-statement.org](http://www.strobe-statement.org).
